# Supplementary material for: An unbiased template of the Drosophila brain and ventral nerve cord
Source: PubMed Central journal article supplement (PMC7774840; doi:10.1371/journal.pone.0236495), 2020-12-31
Supplement: pone.0236495.s001.pdf [file pone.0236495.s001.pdf]

# 1 Supplementary Tables

| Template | Algorithm | Mean  | Std dev | 10th perc | median | 90th perc | N      |
|----------|-----------|-------|---------|-----------|--------|-----------|--------|
| JFRC2010 | ANTs A    | 8.622 | 6.716   | 1.581     | 7.036  | 17.847    | 256308 |
|          | ANTs B    | 4.956 | 3.951   | 1.225     | 3.808  | 10.075    | 146800 |
|          | ANTs C    | 5.196 | 3.865   | 1.414     | 4.243  | 10.223    | 146628 |
|          | CMTK A    | 8.446 | 8.462   | 1.581     | 5.788  | 17.958    | 118112 |
|          | CMTK B    | 7.776 | 7.473   | 1.581     | 5.431  | 16.654    | 119994 |
|          | CMTK C    | 7.686 | 7.710   | 1.732     | 5.523  | 15.133    | 137414 |
|          | Elastix A | 5.452 | 4.060   | 1.414     | 4.528  | 10.794    | 141868 |
|          | Elastix B | 7.431 | 5.954   | 1.581     | 5.745  | 15.764    | 122728 |
| JFRC2013 | ANTs A    | 4.568 | 3.730   | 1.000     | 3.606  | 9.247     | 138368 |
|          | ANTs B    | 6.720 | 4.943   | 1.581     | 5.523  | 13.675    | 128144 |
|          | ANTs C    | 6.563 | 5.076   | 1.581     | 5.196  | 13.528    | 133550 |
|          | CMTK A    | 5.413 | 4.345   | 1.225     | 4.183  | 11.180    | 130310 |
|          | CMTK B    | 5.513 | 4.335   | 1.225     | 4.359  | 11.380    | 135338 |
|          | CMTK C    | 6.112 | 4.696   | 1.414     | 5.000  | 12.490    | 141378 |
|          | Elastix A | 5.079 | 3.812   | 1.414     | 4.123  | 9.950     | 135046 |
|          | Elastix B | 5.653 | 4.511   | 1.414     | 4.472  | 11.533    | 132788 |
| JRC2018  | ANTs A    | 4.659 | 3.824   | 1.000     | 3.606  | 9.513     | 140804 |
|          | ANTs B    | 4.925 | 3.849   | 1.225     | 3.873  | 9.721     | 135624 |
|          | ANTs C    | 5.311 | 4.045   | 1.414     | 4.301  | 10.464    | 141770 |
|          | CMTK A    | 5.000 | 4.021   | 1.225     | 3.873  | 10.025    | 124912 |
|          | CMTK B    | 4.913 | 3.969   | 1.225     | 3.808  | 9.849     | 124664 |
|          | CMTK C    | 4.834 | 3.885   | 1.225     | 3.808  | 9.667     | 128432 |
|          | Elastix A | 4.972 | 3.857   | 1.225     | 4.062  | 9.721     | 130008 |
|          | Elastix B | 5.796 | 4.684   | 1.414     | 4.528  | 12.062    | 119008 |
| FCWB     | ANTs A    | 5.500 | 4.759   | 1.000     | 4.000  | 12.124    | 128116 |
|          | ANTs B    | 8.149 | 5.519   | 2.121     | 7.036  | 16.093    | 103628 |
|          | ANTs C    | 7.903 | 5.370   | 2.000     | 6.819  | 15.330    | 113236 |
|          | CMTK A    | 7.257 | 5.367   | 1.581     | 5.874  | 15.182    | 105712 |
|          | CMTK B    | 6.848 | 5.312   | 1.581     | 5.339  | 14.916    | 109638 |
|          | CMTK C    | 6.666 | 4.872   | 1.581     | 5.431  | 13.656    | 125260 |
|          | Elastix A | 8.217 | 5.590   | 2.000     | 7.106  | 16.340    | 122506 |
|          | Elastix B | 9.228 | 6.644   | 2.236     | 7.649  | 18.722    | 118268 |
| Tefor    | ANTs A    | 4.641 | 3.842   | 1.000     | 3.606  | 9.539     | 141758 |
|          | ANTs B    | 4.824 | 3.725   | 1.225     | 3.808  | 9.747     | 143886 |
|          | ANTs C    | 5.033 | 3.597   | 1.414     | 4.183  | 9.849     | 165882 |
|          | CMTK A    | 7.425 | 5.160   | 1.581     | 6.364  | 14.933    | 140012 |
|          | CMTK B    | 6.941 | 4.928   | 1.581     | 5.874  | 13.946    | 136286 |
|          | CMTK C    | 5.212 | 4.221   | 1.000     | 4.000  | 11.091    | 205034 |
|          | Elastix A | 5.800 | 4.444   | 1.414     | 4.583  | 12.104    | 126216 |
|          | Elastix B | 8.726 | 6.750   | 1.732     | 7.000  | 18.152    | 101056 |

**Table S1.** CRE\_R : crepine

| Template | Algorithm | Mean  | Std dev | 10th perc | median | 90th perc | N     |
|----------|-----------|-------|---------|-----------|--------|-----------|-------|
| JFRC2010 | ANTs A    | 7.403 | 6.977   | 1.581     | 4.950  | 18.221    | 16290 |
|          | ANTs B    | 4.236 | 2.557   | 1.414     | 3.808  | 7.583     | 30124 |
|          | ANTs C    | 4.126 | 2.587   | 1.225     | 3.606  | 7.416     | 37836 |
|          | CMTK A    | 6.262 | 6.624   | 1.225     | 4.062  | 15.000    | 35436 |
|          | CMTK B    | 5.936 | 6.301   | 1.225     | 3.808  | 14.916    | 30950 |
|          | CMTK C    | 6.016 | 5.701   | 1.581     | 4.183  | 14.933    | 33842 |
|          | Elastix A | 4.645 | 3.253   | 1.225     | 3.808  | 9.028     | 14486 |
|          | Elastix B | 4.522 | 3.060   | 1.225     | 3.808  | 8.868     | 14868 |
| JFRC2013 | ANTs A    | 3.932 | 2.799   | 1.000     | 3.240  | 7.649     | 21630 |
|          | ANTs B    | 3.346 | 2.276   | 1.000     | 2.915  | 6.325     | 47016 |
|          | ANTs C    | 3.153 | 2.230   | 0.707     | 2.646  | 6.000     | 44028 |
|          | CMTK A    | 3.529 | 2.666   | 1.000     | 2.915  | 6.856     | 24354 |
|          | CMTK B    | 3.556 | 2.687   | 1.000     | 2.915  | 6.964     | 24016 |
|          | CMTK C    | 4.098 | 2.588   | 1.225     | 3.606  | 7.583     | 34654 |
|          | Elastix A | 3.719 | 2.763   | 1.000     | 3.000  | 7.382     | 23464 |
|          | Elastix B | 4.062 | 2.963   | 1.000     | 3.240  | 8.093     | 21682 |
| JRC2018  | ANTs A    | 3.768 | 2.749   | 1.000     | 3.000  | 7.382     | 21558 |
|          | ANTs B    | 4.132 | 2.791   | 1.000     | 3.606  | 7.649     | 23310 |
|          | ANTs C    | 4.038 | 2.633   | 1.225     | 3.536  | 7.416     | 26778 |
|          | CMTK A    | 3.868 | 2.804   | 1.000     | 3.162  | 7.616     | 21388 |
|          | CMTK B    | 3.908 | 2.907   | 1.000     | 3.082  | 7.842     | 21008 |
|          | CMTK C    | 3.809 | 2.839   | 1.000     | 3.082  | 7.550     | 21214 |
|          | Elastix A | 3.924 | 2.821   | 1.000     | 3.240  | 7.810     | 21484 |
|          | Elastix B | 4.162 | 2.984   | 1.000     | 3.536  | 8.185     | 19802 |
| FCWB     | ANTs A    | 3.755 | 2.665   | 1.000     | 3.082  | 7.246     | 22464 |
|          | ANTs B    | 3.844 | 2.335   | 1.225     | 3.536  | 6.745     | 26150 |
|          | ANTs C    | 3.759 | 2.273   | 1.225     | 3.464  | 6.708     | 22568 |
|          | CMTK A    | 3.814 | 2.649   | 1.000     | 3.240  | 7.280     | 46938 |
|          | CMTK B    | 3.866 | 2.702   | 1.000     | 3.240  | 7.382     | 31124 |
|          | CMTK C    | 4.068 | 2.855   | 1.000     | 3.536  | 7.906     | 33454 |
|          | Elastix A | 3.782 | 3.067   | 1.000     | 3.240  | 6.856     | 39318 |
|          | Elastix B | 4.687 | 3.322   | 1.000     | 3.808  | 9.618     | 56956 |
| Tefor    | ANTs A    | 4.258 | 2.985   | 1.225     | 3.606  | 8.185     | 19428 |
|          | ANTs B    | 4.267 | 2.671   | 1.414     | 3.808  | 7.649     | 24896 |
|          | ANTs C    | 4.942 | 2.938   | 1.581     | 4.528  | 8.631     | 30864 |
|          | CMTK A    | 4.763 | 3.168   | 1.414     | 4.123  | 9.274     | 23110 |
|          | CMTK B    | 4.860 | 3.102   | 1.414     | 4.243  | 9.343     | 23078 |
|          | CMTK C    | 4.490 | 3.093   | 1.414     | 3.808  | 8.544     | 21146 |
|          | Elastix A | 4.494 | 2.952   | 1.225     | 3.808  | 8.399     | 15300 |
|          | Elastix B | 4.062 | 2.450   | 1.225     | 3.606  | 7.382     | 18314 |

**Table S2.** CAN\_R : cantle

| Template | Algorithm | Mean  | Std dev | 10th perc | median | 90th perc | N      |
|----------|-----------|-------|---------|-----------|--------|-----------|--------|
| JFRC2010 | ANTs A    | 7.150 | 7.956   | 1.581     | 4.528  | 19.770    | 225304 |
|          | ANTs B    | 5.234 | 4.993   | 1.581     | 4.183  | 8.746     | 187944 |
|          | ANTs C    | 5.416 | 5.060   | 1.581     | 4.359  | 9.165     | 193640 |
|          | CMTK A    | 5.177 | 4.705   | 1.414     | 4.123  | 9.192     | 189018 |
|          | CMTK B    | 5.022 | 4.600   | 1.414     | 4.062  | 8.602     | 194876 |
|          | CMTK C    | 5.253 | 5.016   | 1.581     | 4.183  | 8.746     | 187834 |
|          | Elastix A | 4.623 | 4.374   | 1.414     | 3.674  | 7.810     | 187814 |
|          | Elastix B | 4.646 | 4.339   | 1.414     | 3.808  | 7.842     | 198088 |
| JFRC2013 | ANTs A    | 4.671 | 4.553   | 1.225     | 3.674  | 7.906     | 194144 |
|          | ANTs B    | 6.253 | 6.122   | 1.581     | 4.743  | 11.180    | 163990 |
|          | ANTs C    | 6.093 | 6.197   | 1.581     | 4.528  | 11.269    | 159530 |
|          | CMTK A    | 5.040 | 4.726   | 1.581     | 4.062  | 8.631     | 178554 |
|          | CMTK B    | 5.070 | 4.724   | 1.414     | 4.062  | 8.660     | 172350 |
|          | CMTK C    | 5.755 | 4.961   | 1.581     | 4.528  | 10.440    | 139908 |
|          | Elastix A | 4.571 | 4.670   | 1.225     | 3.606  | 7.649     | 192020 |
|          | Elastix B | 4.659 | 4.590   | 1.414     | 3.674  | 7.810     | 187546 |
| JRC2018  | ANTs A    | 4.582 | 4.503   | 1.225     | 3.606  | 7.649     | 196510 |
|          | ANTs B    | 4.853 | 4.557   | 1.414     | 3.873  | 8.155     | 200496 |
|          | ANTs C    | 5.003 | 4.938   | 1.414     | 3.873  | 8.515     | 220340 |
|          | CMTK A    | 4.663 | 4.622   | 1.225     | 3.674  | 7.842     | 192616 |
|          | CMTK B    | 4.673 | 4.505   | 1.414     | 3.674  | 7.906     | 190402 |
|          | CMTK C    | 4.754 | 4.397   | 1.414     | 3.808  | 8.031     | 193484 |
|          | Elastix A | 4.570 | 4.344   | 1.414     | 3.674  | 7.616     | 196662 |
|          | Elastix B | 4.712 | 4.633   | 1.414     | 3.808  | 7.906     | 190378 |
| FCWB     | ANTs A    | 4.766 | 4.218   | 1.414     | 3.873  | 8.276     | 198206 |
|          | ANTs B    | 5.606 | 5.450   | 1.581     | 4.472  | 9.539     | 118958 |
|          | ANTs C    | 5.231 | 4.522   | 1.581     | 4.183  | 9.247     | 129264 |
|          | CMTK A    | 5.296 | 4.588   | 1.581     | 4.359  | 9.301     | 189414 |
|          | CMTK B    | 5.277 | 4.672   | 1.581     | 4.301  | 9.220     | 187246 |
|          | CMTK C    | 5.168 | 4.630   | 1.581     | 4.243  | 8.746     | 153568 |
|          | Elastix A | 5.405 | 6.600   | 1.414     | 4.123  | 8.631     | 197108 |
|          | Elastix B | 4.817 | 5.207   | 1.414     | 3.808  | 8.000     | 201070 |
| Tefor    | ANTs A    | 4.629 | 4.464   | 1.225     | 3.674  | 7.810     | 195792 |
|          | ANTs B    | 4.936 | 4.866   | 1.414     | 3.808  | 8.544     | 206934 |
|          | ANTs C    | 5.295 | 5.410   | 1.581     | 4.183  | 8.718     | 221890 |
|          | CMTK A    | 5.096 | 4.741   | 1.414     | 3.873  | 9.028     | 198934 |
|          | CMTK B    | 4.896 | 4.528   | 1.414     | 3.873  | 8.515     | 203194 |
|          | CMTK C    | 5.165 | 5.229   | 1.581     | 4.123  | 8.515     | 201560 |
|          | Elastix A | 4.603 | 4.346   | 1.414     | 3.674  | 7.746     | 187738 |
|          | Elastix B | 4.745 | 4.064   | 1.414     | 3.873  | 8.093     | 197718 |

**Table S3.** AMMC.R : antennal mechanosensory and motor center

| Template | Algorithm | Mean  | Std dev | 10th perc | median | 90th perc | N      |
|----------|-----------|-------|---------|-----------|--------|-----------|--------|
| JFRC2010 | ANTs A    | 8.835 | 7.213   | 1.414     | 6.745  | 19.506    | 501078 |
|          | ANTs B    | 3.167 | 2.986   | 0.707     | 2.236  | 6.671     | 316016 |
|          | ANTs C    | 3.315 | 3.202   | 0.707     | 2.345  | 7.106     | 307394 |
|          | CMTK A    | 4.211 | 5.414   | 0.707     | 2.236  | 11.203    | 293368 |
|          | CMTK B    | 4.158 | 5.566   | 0.707     | 2.236  | 9.539     | 289230 |
|          | CMTK C    | 4.177 | 4.478   | 0.707     | 2.828  | 9.220     | 331886 |
|          | Elastix A | 2.948 | 2.765   | 0.707     | 2.121  | 6.205     | 300488 |
|          | Elastix B | 3.122 | 3.178   | 0.707     | 2.121  | 7.000     | 311002 |
| JFRC2013 | ANTs A    | 2.697 | 2.771   | 0.707     | 2.000  | 5.568     | 321788 |
|          | ANTs B    | 3.434 | 3.348   | 0.707     | 2.345  | 7.681     | 299558 |
|          | ANTs C    | 3.219 | 3.168   | 0.707     | 2.236  | 7.036     | 303386 |
|          | CMTK A    | 3.011 | 2.874   | 0.707     | 2.121  | 6.403     | 293092 |
|          | CMTK B    | 3.169 | 2.972   | 0.707     | 2.236  | 6.819     | 290932 |
|          | CMTK C    | 4.035 | 3.561   | 0.707     | 3.000  | 8.485     | 263762 |
|          | Elastix A | 2.726 | 2.688   | 0.707     | 2.000  | 5.701     | 320686 |
|          | Elastix B | 2.674 | 2.733   | 0.707     | 2.000  | 5.568     | 328936 |
| JRC2018  | ANTs A    | 2.673 | 2.700   | 0.707     | 2.000  | 5.568     | 319308 |
|          | ANTs B    | 2.861 | 2.664   | 0.707     | 2.121  | 5.745     | 326204 |
|          | ANTs C    | 2.902 | 2.819   | 0.707     | 2.121  | 6.000     | 329458 |
|          | CMTK A    | 2.679 | 2.803   | 0.707     | 2.000  | 5.568     | 298028 |
|          | CMTK B    | 2.660 | 2.771   | 0.707     | 1.732  | 5.568     | 296780 |
|          | CMTK C    | 2.717 | 2.683   | 0.707     | 2.000  | 5.568     | 303460 |
|          | Elastix A | 2.742 | 2.706   | 0.707     | 2.121  | 5.657     | 312578 |
|          | Elastix B | 2.711 | 2.714   | 0.707     | 2.000  | 5.568     | 310436 |
| FCWB     | ANTs A    | 2.758 | 2.812   | 0.707     | 2.000  | 5.874     | 334680 |
|          | ANTs B    | 3.551 | 3.415   | 0.707     | 2.449  | 7.937     | 310126 |
|          | ANTs C    | 3.377 | 3.280   | 0.707     | 2.345  | 7.416     | 305450 |
|          | CMTK A    | 5.384 | 5.552   | 0.707     | 3.536  | 12.981    | 283240 |
|          | CMTK B    | 4.969 | 5.255   | 0.707     | 3.240  | 11.269    | 264802 |
|          | CMTK C    | 3.833 | 4.041   | 0.707     | 2.550  | 8.631     | 304944 |
|          | Elastix A | 6.306 | 6.023   | 0.707     | 4.183  | 15.313    | 290364 |
|          | Elastix B | 3.448 | 4.041   | 0.707     | 2.121  | 7.906     | 304660 |
| Tefor    | ANTs A    | 2.671 | 2.668   | 0.707     | 2.000  | 5.568     | 321736 |
|          | ANTs B    | 3.090 | 2.853   | 0.707     | 2.236  | 6.557     | 322866 |
|          | ANTs C    | 3.239 | 3.132   | 0.707     | 2.236  | 7.036     | 319676 |
|          | CMTK A    | 3.468 | 4.315   | 0.707     | 2.121  | 8.031     | 296402 |
|          | CMTK B    | 3.586 | 4.498   | 0.707     | 2.121  | 8.337     | 299568 |
|          | CMTK C    | 3.490 | 3.250   | 0.707     | 2.550  | 7.583     | 319366 |
|          | Elastix A | 2.837 | 2.731   | 0.707     | 2.121  | 5.916     | 305932 |
|          | Elastix B | 3.276 | 3.410   | 0.707     | 2.121  | 7.314     | 315504 |

**Table S4.** ICL.R : inferior clamp

| Template | Algorithm | Mean  | Std dev | 10th perc | median | 90th perc | N      |
|----------|-----------|-------|---------|-----------|--------|-----------|--------|
| JFRC2010 | ANTs A    | 8.273 | 6.716   | 1.732     | 6.205  | 18.125    | 124266 |
|          | ANTs B    | 4.619 | 3.635   | 1.225     | 3.808  | 8.972     | 171134 |
|          | ANTs C    | 4.846 | 4.001   | 1.000     | 3.808  | 9.925     | 176908 |
|          | CMTK A    | 7.379 | 6.750   | 1.414     | 5.000  | 17.277    | 162750 |
|          | CMTK B    | 7.217 | 6.801   | 1.414     | 4.743  | 17.132    | 139584 |
|          | CMTK C    | 6.430 | 6.078   | 1.414     | 4.301  | 15.199    | 184334 |
|          | Elastix A | 4.157 | 3.351   | 1.000     | 3.240  | 8.276     | 136550 |
|          | Elastix B | 4.352 | 3.374   | 1.000     | 3.536  | 8.660     | 122002 |
| JFRC2013 | ANTs A    | 4.537 | 3.631   | 1.000     | 3.606  | 9.055     | 113054 |
|          | ANTs B    | 4.515 | 3.459   | 1.225     | 3.606  | 8.860     | 279266 |
|          | ANTs C    | 4.575 | 3.668   | 1.000     | 3.606  | 9.247     | 244618 |
|          | CMTK A    | 4.719 | 3.648   | 1.225     | 3.808  | 9.539     | 98662  |
|          | CMTK B    | 4.759 | 3.657   | 1.225     | 3.808  | 9.513     | 99628  |
|          | CMTK C    | 4.877 | 3.859   | 1.225     | 3.808  | 10.025    | 182464 |
|          | Elastix A | 4.506 | 3.545   | 1.225     | 3.606  | 8.972     | 116176 |
|          | Elastix B | 4.487 | 3.474   | 1.000     | 3.606  | 8.746     | 111036 |
| JRC2018  | ANTs A    | 4.464 | 3.631   | 1.000     | 3.606  | 8.972     | 111894 |
|          | ANTs B    | 4.932 | 3.717   | 1.225     | 4.062  | 9.823     | 136380 |
|          | ANTs C    | 4.973 | 3.597   | 1.414     | 4.062  | 9.925     | 135970 |
|          | CMTK A    | 4.531 | 3.617   | 1.000     | 3.606  | 9.000     | 95754  |
|          | CMTK B    | 4.536 | 3.632   | 1.000     | 3.606  | 9.055     | 92400  |
|          | CMTK C    | 4.594 | 3.672   | 1.000     | 3.674  | 9.220     | 100094 |
|          | Elastix A | 4.487 | 3.531   | 1.000     | 3.606  | 8.718     | 118292 |
|          | Elastix B | 4.466 | 3.374   | 1.000     | 3.674  | 8.660     | 112558 |
| FCWB     | ANTs A    | 4.787 | 3.985   | 1.000     | 3.674  | 9.592     | 112756 |
|          | ANTs B    | 4.878 | 3.636   | 1.414     | 4.062  | 9.513     | 221906 |
|          | ANTs C    | 4.971 | 3.861   | 1.414     | 4.062  | 9.849     | 184380 |
|          | CMTK A    | 7.352 | 5.921   | 1.581     | 5.431  | 16.340    | 189818 |
|          | CMTK B    | 6.945 | 5.472   | 1.581     | 5.292  | 14.868    | 139980 |
|          | CMTK C    | 6.271 | 4.814   | 1.581     | 4.950  | 13.285    | 153026 |
|          | Elastix A | 7.003 | 5.628   | 1.581     | 5.431  | 14.474    | 264300 |
|          | Elastix B | 7.055 | 5.435   | 1.581     | 5.431  | 15.330    | 205946 |
| Tefor    | ANTs A    | 4.442 | 3.502   | 1.000     | 3.606  | 8.746     | 120918 |
|          | ANTs B    | 4.467 | 3.393   | 1.225     | 3.606  | 8.660     | 201810 |
|          | ANTs C    | 5.259 | 3.794   | 1.414     | 4.359  | 10.271    | 194238 |
|          | CMTK A    | 7.314 | 5.607   | 1.581     | 5.788  | 16.016    | 156436 |
|          | CMTK B    | 7.404 | 5.644   | 1.581     | 5.874  | 16.016    | 160204 |
|          | CMTK C    | 6.877 | 5.227   | 1.581     | 5.292  | 14.849    | 165862 |
|          | Elastix A | 4.217 | 3.378   | 1.000     | 3.464  | 8.185     | 147790 |
|          | Elastix B | 4.809 | 3.647   | 1.225     | 3.808  | 9.925     | 168850 |

**Table S5.** VES\_R : vest

| Template  | Algorithm | Mean  | Std dev | 10th perc | median | 90th perc | N      |
|-----------|-----------|-------|---------|-----------|--------|-----------|--------|
| JFRC2010  | ANTs A    | 5.841 | 5.356   | 1.000     | 3.873  | 13.416    | 212072 |
|           | ANTs B    | 4.067 | 3.357   | 1.000     | 3.082  | 8.660     | 255490 |
|           | ANTs C    | 4.098 | 3.194   | 1.000     | 3.240  | 8.426     | 364138 |
|           | CMTK A    | 4.722 | 4.537   | 1.000     | 3.240  | 10.630    | 247624 |
|           | CMTK B    | 4.457 | 4.372   | 1.000     | 3.082  | 9.644     | 257816 |
|           | CMTK C    | 4.417 | 4.448   | 1.000     | 3.082  | 9.220     | 370982 |
|           | Elastix A | 3.060 | 2.493   | 0.707     | 2.449  | 5.916     | 259080 |
| Elastix B | 3.670     | 3.090 | 0.707   | 2.828     | 7.906  | 211838    |        |
| JFRC2013  | ANTs A    | 3.163 | 2.767   | 0.707     | 2.345  | 6.557     | 210128 |
|           | ANTs B    | 4.260 | 3.368   | 1.000     | 3.317  | 8.775     | 324356 |
|           | ANTs C    | 4.210 | 3.293   | 1.000     | 3.317  | 8.775     | 325204 |
|           | CMTK A    | 3.366 | 2.867   | 0.707     | 2.550  | 6.964     | 181380 |
|           | CMTK B    | 3.509 | 2.882   | 0.707     | 2.646  | 7.280     | 178796 |
|           | CMTK C    | 4.819 | 3.925   | 1.000     | 3.606  | 11.068    | 207494 |
|           | Elastix A | 3.105 | 2.621   | 0.707     | 2.345  | 6.325     | 213226 |
| Elastix B | 3.115     | 2.625 | 0.707   | 2.345     | 6.403  | 201400    |        |
| JRC2018   | ANTs A    | 3.101 | 2.674   | 0.707     | 2.345  | 6.403     | 216404 |
|           | ANTs B    | 3.405 | 2.886   | 0.707     | 2.646  | 7.071     | 226268 |
|           | ANTs C    | 3.214 | 2.667   | 0.707     | 2.550  | 6.557     | 227828 |
|           | CMTK A    | 3.321 | 3.016   | 0.707     | 2.449  | 7.106     | 183046 |
|           | CMTK B    | 3.190 | 2.844   | 0.707     | 2.345  | 6.671     | 181056 |
|           | CMTK C    | 3.128 | 2.739   | 0.707     | 2.345  | 6.442     | 195562 |
|           | Elastix A | 3.155 | 2.681   | 0.707     | 2.449  | 6.403     | 203250 |
| Elastix B | 3.184     | 2.710 | 0.707   | 2.449     | 6.633  | 198934    |        |
| FCWB      | ANTs A    | 3.343 | 2.863   | 0.707     | 2.550  | 6.856     | 208368 |
|           | ANTs B    | 4.804 | 3.684   | 1.000     | 3.808  | 10.149    | 295074 |
|           | ANTs C    | 3.921 | 2.902   | 1.000     | 3.162  | 7.906     | 345268 |
|           | CMTK A    | 6.347 | 5.291   | 1.225     | 4.743  | 13.964    | 204434 |
|           | CMTK B    | 5.750 | 4.965   | 1.000     | 4.123  | 12.923    | 198092 |
|           | CMTK C    | 4.281 | 3.728   | 1.000     | 3.082  | 9.513     | 246048 |
|           | Elastix A | 7.917 | 7.926   | 1.414     | 5.292  | 18.152    | 242588 |
| Elastix B | 4.365     | 4.009 | 1.000   | 3.162     | 9.434  | 222796    |        |
| Tefor     | ANTs A    | 3.107 | 2.665   | 0.707     | 2.345  | 6.364     | 212832 |
|           | ANTs B    | 3.848 | 3.211   | 1.000     | 2.915  | 8.031     | 239752 |
|           | ANTs C    | 3.998 | 3.250   | 1.000     | 3.082  | 8.515     | 275152 |
|           | CMTK A    | 4.508 | 4.170   | 0.707     | 3.000  | 10.863    | 206740 |
|           | CMTK B    | 4.501 | 4.218   | 0.707     | 3.000  | 10.977    | 208652 |
|           | CMTK C    | 4.508 | 3.874   | 1.000     | 3.240  | 10.223    | 206512 |
|           | Elastix A | 3.207 | 2.703   | 0.707     | 2.550  | 6.481     | 219002 |
| Elastix B | 3.689     | 3.088 | 0.707   | 2.828     | 8.000  | 211786    |        |

**Table S6.** IB\_R : inferior bridge

| Template | Algorithm | Mean  | Std dev | 10th perc | median | 90th perc | N      |
|----------|-----------|-------|---------|-----------|--------|-----------|--------|
| JFRC2010 | ANTs A    | 4.343 | 3.451   | 1.000     | 3.536  | 8.485     | 125792 |
|          | ANTs B    | 4.230 | 2.710   | 1.225     | 3.674  | 8.031     | 99154  |
|          | ANTs C    | 4.473 | 3.157   | 1.000     | 3.674  | 9.000     | 116250 |
|          | CMTK A    | 4.913 | 3.653   | 1.000     | 4.000  | 10.000    | 100040 |
|          | CMTK B    | 4.735 | 3.419   | 1.000     | 3.873  | 9.539     | 100534 |
|          | CMTK C    | 4.179 | 3.048   | 1.000     | 3.536  | 8.276     | 124706 |
|          | Elastix A | 3.471 | 2.269   | 1.000     | 3.000  | 6.557     | 98164  |
|          | Elastix B | 3.774 | 2.437   | 1.000     | 3.240  | 7.141     | 108068 |
| JFRC2013 | ANTs A    | 3.491 | 2.498   | 1.000     | 2.915  | 6.557     | 102024 |
|          | ANTs B    | 4.523 | 3.082   | 1.225     | 3.808  | 8.888     | 113776 |
|          | ANTs C    | 4.536 | 3.198   | 1.000     | 3.808  | 9.110     | 110298 |
|          | CMTK A    | 3.449 | 2.294   | 1.000     | 2.915  | 6.481     | 93474  |
|          | CMTK B    | 3.571 | 2.345   | 1.000     | 3.082  | 6.671     | 90208  |
|          | CMTK C    | 4.575 | 2.978   | 1.414     | 3.873  | 8.718     | 90024  |
|          | Elastix A | 3.454 | 2.241   | 1.000     | 3.000  | 6.403     | 100400 |
|          | Elastix B | 3.377 | 2.305   | 1.000     | 2.915  | 6.519     | 104878 |
| JRC2018  | ANTs A    | 3.239 | 2.275   | 1.000     | 2.646  | 6.083     | 105940 |
|          | ANTs B    | 3.613 | 2.450   | 1.000     | 3.082  | 6.708     | 101916 |
|          | ANTs C    | 3.546 | 2.438   | 1.000     | 3.000  | 6.671     | 101848 |
|          | CMTK A    | 3.383 | 2.437   | 1.000     | 2.915  | 6.481     | 100240 |
|          | CMTK B    | 3.374 | 2.375   | 1.000     | 2.915  | 6.442     | 99604  |
|          | CMTK C    | 3.408 | 2.293   | 1.000     | 2.915  | 6.364     | 97688  |
|          | Elastix A | 3.435 | 2.284   | 1.000     | 3.000  | 6.519     | 96144  |
|          | Elastix B | 3.345 | 2.313   | 1.000     | 2.915  | 6.442     | 105946 |
| FCWB     | ANTs A    | 3.665 | 2.486   | 1.000     | 3.162  | 6.856     | 95158  |
|          | ANTs B    | 4.521 | 2.948   | 1.225     | 3.808  | 8.746     | 107846 |
|          | ANTs C    | 4.260 | 2.853   | 1.225     | 3.606  | 8.367     | 118618 |
|          | CMTK A    | 5.780 | 5.223   | 1.414     | 4.359  | 11.358    | 72358  |
|          | CMTK B    | 5.523 | 5.176   | 1.414     | 4.062  | 11.180    | 76574  |
|          | CMTK C    | 4.258 | 2.995   | 1.225     | 3.606  | 8.093     | 88152  |
|          | Elastix A | 6.748 | 6.980   | 1.581     | 4.950  | 12.207    | 91484  |
|          | Elastix B | 4.385 | 3.467   | 1.000     | 3.536  | 8.660     | 93730  |
| Tefor    | ANTs A    | 3.239 | 2.249   | 1.000     | 2.828  | 6.083     | 104392 |
|          | ANTs B    | 4.069 | 2.637   | 1.225     | 3.606  | 7.616     | 99864  |
|          | ANTs C    | 4.376 | 3.001   | 1.225     | 3.674  | 8.544     | 108260 |
|          | CMTK A    | 3.885 | 2.724   | 1.000     | 3.240  | 7.583     | 112418 |
|          | CMTK B    | 3.824 | 2.622   | 1.000     | 3.240  | 7.348     | 114492 |
|          | CMTK C    | 4.280 | 2.708   | 1.225     | 3.808  | 8.000     | 98510  |
|          | Elastix A | 3.430 | 2.297   | 1.000     | 2.915  | 6.633     | 104642 |
|          | Elastix B | 3.480 | 2.372   | 1.000     | 3.000  | 6.671     | 117174 |

**Table S7.** ATL\_R : antler



| Template | Algorithm | Mean  | Std dev | 10th perc | median | 90th perc | N      |
|----------|-----------|-------|---------|-----------|--------|-----------|--------|
| JFRC2010 | ANTs A    | 8.622 | 6.716   | 1.581     | 7.036  | 17.847    | 256308 |
|          | ANTs B    | 4.956 | 3.951   | 1.225     | 3.808  | 10.075    | 146800 |
|          | ANTs C    | 5.196 | 3.865   | 1.414     | 4.243  | 10.223    | 146628 |
|          | CMTK A    | 8.446 | 8.462   | 1.581     | 5.788  | 17.958    | 118112 |
|          | CMTK B    | 7.776 | 7.473   | 1.581     | 5.431  | 16.654    | 119994 |
|          | CMTK C    | 7.686 | 7.710   | 1.732     | 5.523  | 15.133    | 137414 |
|          | Elastix A | 5.452 | 4.060   | 1.414     | 4.528  | 10.794    | 141868 |
|          | Elastix B | 7.431 | 5.954   | 1.581     | 5.745  | 15.764    | 122728 |
| JFRC2013 | ANTs A    | 4.568 | 3.730   | 1.000     | 3.606  | 9.247     | 138368 |
|          | ANTs B    | 6.720 | 4.943   | 1.581     | 5.523  | 13.675    | 128144 |
|          | ANTs C    | 6.563 | 5.076   | 1.581     | 5.196  | 13.528    | 133550 |
|          | CMTK A    | 5.413 | 4.345   | 1.225     | 4.183  | 11.180    | 130310 |
|          | CMTK B    | 5.513 | 4.335   | 1.225     | 4.359  | 11.380    | 135338 |
|          | CMTK C    | 6.112 | 4.696   | 1.414     | 5.000  | 12.490    | 141378 |
|          | Elastix A | 5.079 | 3.812   | 1.414     | 4.123  | 9.950     | 135046 |
|          | Elastix B | 5.653 | 4.511   | 1.414     | 4.472  | 11.533    | 132788 |
| JRC2018  | ANTs A    | 4.659 | 3.824   | 1.000     | 3.606  | 9.513     | 140804 |
|          | ANTs B    | 4.925 | 3.849   | 1.225     | 3.873  | 9.721     | 135624 |
|          | ANTs C    | 5.311 | 4.045   | 1.414     | 4.301  | 10.464    | 141770 |
|          | CMTK A    | 5.000 | 4.021   | 1.225     | 3.873  | 10.025    | 124912 |
|          | CMTK B    | 4.913 | 3.969   | 1.225     | 3.808  | 9.849     | 124664 |
|          | CMTK C    | 4.834 | 3.885   | 1.225     | 3.808  | 9.667     | 128432 |
|          | Elastix A | 4.972 | 3.857   | 1.225     | 4.062  | 9.721     | 130008 |
|          | Elastix B | 5.796 | 4.684   | 1.414     | 4.528  | 12.062    | 119008 |
| FCWB     | ANTs A    | 5.500 | 4.759   | 1.000     | 4.000  | 12.124    | 128116 |
|          | ANTs B    | 8.149 | 5.519   | 2.121     | 7.036  | 16.093    | 103628 |
|          | ANTs C    | 7.903 | 5.370   | 2.000     | 6.819  | 15.330    | 113236 |
|          | CMTK A    | 7.257 | 5.367   | 1.581     | 5.874  | 15.182    | 105712 |
|          | CMTK B    | 6.848 | 5.312   | 1.581     | 5.339  | 14.916    | 109638 |
|          | CMTK C    | 6.666 | 4.872   | 1.581     | 5.431  | 13.656    | 125260 |
|          | Elastix A | 8.217 | 5.590   | 2.000     | 7.106  | 16.340    | 122506 |
|          | Elastix B | 9.228 | 6.644   | 2.236     | 7.649  | 18.722    | 118268 |
| Tefor    | ANTs A    | 4.641 | 3.842   | 1.000     | 3.606  | 9.539     | 141758 |
|          | ANTs B    | 4.824 | 3.725   | 1.225     | 3.808  | 9.747     | 143886 |
|          | ANTs C    | 5.033 | 3.597   | 1.414     | 4.183  | 9.849     | 165882 |
|          | CMTK A    | 7.425 | 5.160   | 1.581     | 6.364  | 14.933    | 140012 |
|          | CMTK B    | 6.941 | 4.928   | 1.581     | 5.874  | 13.946    | 136286 |
|          | CMTK C    | 5.212 | 4.221   | 1.000     | 4.000  | 11.091    | 205034 |
|          | Elastix A | 5.800 | 4.444   | 1.414     | 4.583  | 12.104    | 126216 |
|          | Elastix B | 8.726 | 6.750   | 1.732     | 7.000  | 18.152    | 101056 |

**Table S8.** CRE\_R : crepine

| Template | Algorithm | Mean  | Std dev | 10th perc | median | 90th perc | N     |
|----------|-----------|-------|---------|-----------|--------|-----------|-------|
| JFRC2010 | ANTs A    | 7.214 | 7.129   | 1.581     | 5.196  | 14.177    | 74380 |
|          | ANTs B    | 5.165 | 3.881   | 1.225     | 4.123  | 10.630    | 70674 |
|          | ANTs C    | 5.380 | 4.167   | 1.225     | 4.183  | 11.489    | 68636 |
|          | CMTK A    | 5.749 | 4.344   | 1.000     | 4.528  | 12.186    | 64380 |
|          | CMTK B    | 6.011 | 5.345   | 1.000     | 4.301  | 13.509    | 61530 |
|          | CMTK C    | 6.030 | 5.006   | 1.414     | 4.528  | 12.669    | 59820 |
|          | Elastix A | 5.279 | 3.905   | 1.414     | 4.183  | 10.977    | 64292 |
|          | Elastix B | 5.713 | 4.552   | 1.414     | 4.359  | 12.367    | 66282 |
| JFRC2013 | ANTs A    | 4.841 | 3.786   | 1.000     | 3.808  | 10.271    | 73940 |
|          | ANTs B    | 5.863 | 4.432   | 1.414     | 4.690  | 12.000    | 63096 |
|          | ANTs C    | 5.789 | 4.415   | 1.414     | 4.583  | 11.937    | 59998 |
|          | CMTK A    | 5.166 | 4.027   | 1.225     | 4.123  | 10.724    | 72824 |
|          | CMTK B    | 5.404 | 4.078   | 1.225     | 4.359  | 11.180    | 70880 |
|          | CMTK C    | 5.706 | 4.186   | 1.414     | 4.583  | 11.937    | 63138 |
|          | Elastix A | 4.885 | 3.756   | 1.225     | 3.808  | 10.247    | 70494 |
|          | Elastix B | 4.837 | 3.748   | 1.000     | 3.808  | 10.149    | 69148 |
| JRC2018  | ANTs A    | 4.852 | 3.796   | 1.000     | 3.808  | 10.400    | 75608 |
|          | ANTs B    | 4.791 | 3.770   | 1.000     | 3.674  | 10.296    | 76030 |
|          | ANTs C    | 4.962 | 3.862   | 1.225     | 3.808  | 10.536    | 73184 |
|          | CMTK A    | 4.825 | 3.827   | 1.000     | 3.674  | 10.464    | 74458 |
|          | CMTK B    | 4.767 | 3.787   | 1.000     | 3.606  | 10.344    | 74242 |
|          | CMTK C    | 4.802 | 3.813   | 1.000     | 3.606  | 10.392    | 74460 |
|          | Elastix A | 4.803 | 3.679   | 1.000     | 3.808  | 10.124    | 74648 |
|          | Elastix B | 4.874 | 3.765   | 1.000     | 3.808  | 10.344    | 70694 |
| FCWB     | ANTs A    | 4.935 | 4.184   | 1.000     | 3.808  | 10.440    | 74328 |
|          | ANTs B    | 4.656 | 3.935   | 1.000     | 3.536  | 10.149    | 60650 |
|          | ANTs C    | 5.295 | 4.425   | 1.225     | 4.062  | 11.203    | 61662 |
|          | CMTK A    | 5.696 | 4.149   | 1.581     | 4.528  | 11.619    | 48344 |
|          | CMTK B    | 5.692 | 4.266   | 1.581     | 4.528  | 11.726    | 49326 |
|          | CMTK C    | 4.718 | 3.796   | 1.000     | 3.606  | 10.392    | 63940 |
|          | Elastix A | 5.827 | 4.159   | 1.414     | 4.950  | 11.747    | 64586 |
|          | Elastix B | 5.037 | 4.151   | 1.000     | 3.606  | 11.402    | 60602 |
| Tefor    | ANTs A    | 4.904 | 3.799   | 1.000     | 3.808  | 10.464    | 76484 |
|          | ANTs B    | 4.951 | 3.772   | 1.225     | 3.873  | 10.512    | 70062 |
|          | ANTs C    | 5.143 | 3.862   | 1.225     | 4.123  | 10.794    | 74764 |
|          | CMTK A    | 5.835 | 5.576   | 1.000     | 4.000  | 13.304    | 69062 |
|          | CMTK B    | 5.863 | 5.852   | 1.000     | 3.808  | 13.678    | 66370 |
|          | CMTK C    | 5.104 | 4.305   | 1.000     | 3.808  | 11.023    | 71454 |
|          | Elastix A | 5.061 | 3.945   | 1.225     | 3.873  | 10.817    | 68372 |
|          | Elastix B | 5.727 | 4.716   | 1.225     | 4.243  | 12.884    | 64534 |

**Table S9.** MB.PED.R : pedunculus of adult mushroom body

| Template | Algorithm | Mean  | Std dev | 10th perc | median | 90th perc | N      |
|----------|-----------|-------|---------|-----------|--------|-----------|--------|
| JFRC2010 | ANTs A    | 6.250 | 5.399   | 1.414     | 4.583  | 13.865    | 148586 |
|          | ANTs B    | 5.022 | 3.986   | 1.414     | 4.062  | 9.513     | 104580 |
|          | ANTs C    | 5.003 | 3.820   | 1.414     | 4.123  | 9.618     | 120192 |
|          | CMTK A    | 5.027 | 4.511   | 1.000     | 3.674  | 11.000    | 118312 |
|          | CMTK B    | 6.132 | 7.278   | 1.000     | 3.808  | 14.248    | 114094 |
|          | CMTK C    | 6.397 | 6.223   | 1.581     | 4.359  | 14.663    | 93648  |
|          | Elastix A | 4.394 | 3.757   | 1.000     | 3.536  | 8.660     | 121992 |
|          | Elastix B | 4.544 | 3.910   | 1.225     | 3.606  | 8.276     | 134566 |
| JFRC2013 | ANTs A    | 5.091 | 3.742   | 1.414     | 4.301  | 9.721     | 116878 |
|          | ANTs B    | 5.689 | 4.373   | 1.581     | 4.528  | 11.180    | 100764 |
|          | ANTs C    | 5.703 | 4.106   | 1.581     | 4.743  | 11.158    | 97684  |
|          | CMTK A    | 4.824 | 3.670   | 1.225     | 4.062  | 9.327     | 118996 |
|          | CMTK B    | 5.142 | 3.702   | 1.581     | 4.359  | 9.721     | 112736 |
|          | CMTK C    | 6.148 | 4.094   | 1.732     | 5.196  | 11.576    | 71658  |
|          | Elastix A | 4.220 | 3.618   | 1.000     | 3.240  | 8.185     | 128582 |
|          | Elastix B | 4.297 | 3.732   | 1.000     | 3.317  | 8.093     | 133324 |
| JRC2018  | ANTs A    | 4.199 | 3.521   | 1.000     | 3.317  | 7.810     | 128470 |
|          | ANTs B    | 4.913 | 3.808   | 1.414     | 3.873  | 9.644     | 116984 |
|          | ANTs C    | 4.865 | 3.836   | 1.225     | 3.873  | 9.539     | 124096 |
|          | CMTK A    | 4.170 | 3.537   | 1.000     | 3.240  | 7.906     | 125576 |
|          | CMTK B    | 4.288 | 3.640   | 1.000     | 3.464  | 8.307     | 121318 |
|          | CMTK C    | 4.467 | 3.658   | 1.000     | 3.606  | 8.718     | 120790 |
|          | Elastix A | 4.216 | 3.690   | 1.000     | 3.240  | 8.093     | 120206 |
|          | Elastix B | 4.263 | 3.622   | 1.000     | 3.464  | 7.937     | 128328 |
| FCWB     | ANTs A    | 5.574 | 4.400   | 1.414     | 4.472  | 11.203    | 94886  |
|          | ANTs B    | 5.305 | 3.943   | 1.581     | 4.359  | 9.849     | 71238  |
|          | ANTs C    | 6.004 | 4.187   | 1.732     | 5.000  | 11.683    | 72886  |
|          | CMTK A    | 4.882 | 3.616   | 1.414     | 4.062  | 9.460     | 103216 |
|          | CMTK B    | 4.958 | 3.757   | 1.581     | 4.000  | 9.747     | 95366  |
|          | CMTK C    | 4.734 | 3.311   | 1.414     | 4.062  | 8.860     | 72578  |
|          | Elastix A | 4.724 | 3.838   | 1.225     | 3.808  | 9.028     | 96340  |
|          | Elastix B | 4.311 | 3.889   | 1.000     | 3.464  | 7.778     | 116388 |
| Tefor    | ANTs A    | 4.196 | 3.536   | 1.000     | 3.464  | 7.906     | 128050 |
|          | ANTs B    | 4.670 | 3.621   | 1.414     | 3.808  | 8.746     | 110182 |
|          | ANTs C    | 4.626 | 3.545   | 1.225     | 3.808  | 8.775     | 123050 |
|          | CMTK A    | 6.937 | 8.519   | 1.000     | 3.808  | 18.655    | 111368 |
|          | CMTK B    | 7.278 | 9.252   | 1.225     | 3.873  | 19.028    | 106430 |
|          | CMTK C    | 5.438 | 4.413   | 1.581     | 4.301  | 10.700    | 96924  |
|          | Elastix A | 4.248 | 3.632   | 1.000     | 3.464  | 8.031     | 118540 |
|          | Elastix B | 4.553 | 4.048   | 1.225     | 3.606  | 8.367     | 126070 |

**Table S10.** MB.VL.R : vertical lobe of adult mushroom body

| Template | Algorithm | Mean  | Std dev | 10th perc | median | 90th perc | N      |
|----------|-----------|-------|---------|-----------|--------|-----------|--------|
| JFRC2010 | ANTs A    | 6.145 | 5.543   | 1.000     | 4.062  | 14.933    | 234816 |
|          | ANTs B    | 3.859 | 3.646   | 0.707     | 2.915  | 8.031     | 274290 |
|          | ANTs C    | 4.286 | 3.780   | 1.000     | 3.240  | 8.660     | 243720 |
|          | CMTK A    | 6.737 | 8.623   | 1.000     | 3.674  | 17.015    | 217274 |
|          | CMTK B    | 5.740 | 6.691   | 0.707     | 3.536  | 13.435    | 227764 |
|          | CMTK C    | 5.712 | 7.195   | 0.707     | 3.464  | 13.509    | 273894 |
|          | Elastix A | 3.832 | 3.735   | 0.707     | 2.915  | 7.810     | 285614 |
|          | Elastix B | 5.354 | 5.249   | 1.000     | 3.606  | 12.430    | 217368 |
| JFRC2013 | ANTs A    | 4.009 | 3.817   | 1.000     | 2.915  | 8.093     | 255556 |
|          | ANTs B    | 4.958 | 4.391   | 1.000     | 3.674  | 10.440    | 202548 |
|          | ANTs C    | 5.385 | 4.809   | 1.225     | 3.873  | 11.597    | 176168 |
|          | CMTK A    | 4.716 | 4.169   | 1.000     | 3.536  | 9.925     | 221616 |
|          | CMTK B    | 4.728 | 4.190   | 1.000     | 3.536  | 10.025    | 214090 |
|          | CMTK C    | 5.401 | 4.579   | 1.225     | 4.062  | 11.358    | 150036 |
|          | Elastix A | 4.182 | 3.908   | 1.000     | 3.082  | 8.367     | 251898 |
|          | Elastix B | 4.602 | 4.264   | 1.000     | 3.464  | 9.327     | 227968 |
| JRC2018  | ANTs A    | 4.031 | 3.839   | 1.000     | 2.915  | 8.031     | 258948 |
|          | ANTs B    | 3.986 | 3.757   | 0.707     | 2.915  | 8.093     | 257518 |
|          | ANTs C    | 4.227 | 3.829   | 1.000     | 3.162  | 8.396     | 249260 |
|          | CMTK A    | 4.172 | 3.922   | 1.000     | 3.082  | 8.396     | 249050 |
|          | CMTK B    | 4.162 | 3.868   | 1.000     | 3.082  | 8.396     | 244526 |
|          | CMTK C    | 4.092 | 3.771   | 1.000     | 3.000  | 8.307     | 245308 |
|          | Elastix A | 4.164 | 3.812   | 1.000     | 3.162  | 8.276     | 252466 |
|          | Elastix B | 4.867 | 4.504   | 1.000     | 3.606  | 10.025    | 230630 |
| FCWB     | ANTs A    | 4.441 | 4.299   | 1.000     | 3.162  | 9.301     | 220032 |
|          | ANTs B    | 5.193 | 4.423   | 1.225     | 4.062  | 10.464    | 142946 |
|          | ANTs C    | 5.800 | 4.831   | 1.414     | 4.528  | 12.166    | 131222 |
|          | CMTK A    | 5.238 | 4.257   | 1.225     | 4.062  | 10.724    | 211104 |
|          | CMTK B    | 4.978 | 4.098   | 1.225     | 3.808  | 10.223    | 219434 |
|          | CMTK C    | 4.454 | 3.875   | 1.000     | 3.317  | 9.220     | 196264 |
|          | Elastix A | 5.595 | 4.525   | 1.225     | 4.359  | 11.533    | 209372 |
|          | Elastix B | 6.610 | 6.433   | 1.000     | 4.243  | 16.583    | 187980 |
| Tefor    | ANTs A    | 4.081 | 3.838   | 1.000     | 3.000  | 8.185     | 254684 |
|          | ANTs B    | 3.871 | 3.607   | 0.707     | 2.915  | 7.842     | 267642 |
|          | ANTs C    | 4.381 | 3.767   | 1.000     | 3.240  | 8.775     | 255450 |
|          | CMTK A    | 4.782 | 3.948   | 1.000     | 3.674  | 9.721     | 245312 |
|          | CMTK B    | 4.813 | 4.047   | 1.000     | 3.674  | 9.899     | 239164 |
|          | CMTK C    | 4.671 | 4.179   | 1.000     | 3.536  | 9.925     | 279808 |
|          | Elastix A | 4.214 | 3.832   | 0.707     | 3.162  | 8.515     | 251118 |
|          | Elastix B | 7.834 | 7.745   | 1.414     | 4.950  | 20.267    | 149546 |

**Table S11.** MB\_ML\_R : medial lobe of adult mushroom body

| Template | Algorithm | Mean  | Std dev | 10th perc | median | 90th perc | N      |
|----------|-----------|-------|---------|-----------|--------|-----------|--------|
| JFRC2010 | ANTs A    | 5.474 | 8.066   | 0.707     | 2.915  | 11.597    | 354210 |
|          | ANTs B    | 3.321 | 2.687   | 0.707     | 2.828  | 6.364     | 377092 |
|          | ANTs C    | 3.267 | 2.787   | 0.707     | 2.646  | 6.442     | 419414 |
|          | CMTK A    | 3.680 | 4.159   | 0.707     | 2.550  | 7.382     | 352410 |
|          | CMTK B    | 3.637 | 4.142   | 0.707     | 2.550  | 7.280     | 361674 |
|          | CMTK C    | 3.641 | 3.605   | 0.707     | 2.646  | 7.416     | 348282 |
|          | Elastix A | 2.724 | 2.391   | 0.707     | 2.236  | 5.339     | 368494 |
|          | Elastix B | 2.707 | 2.404   | 0.707     | 2.236  | 5.292     | 365130 |
| JFRC2013 | ANTs A    | 2.676 | 2.259   | 0.707     | 2.121  | 5.339     | 399670 |
|          | ANTs B    | 4.493 | 3.953   | 1.000     | 3.606  | 8.631     | 262524 |
|          | ANTs C    | 4.066 | 3.673   | 1.000     | 3.240  | 7.681     | 272910 |
|          | CMTK A    | 2.641 | 2.233   | 0.707     | 2.121  | 5.196     | 424002 |
|          | CMTK B    | 2.628 | 2.202   | 0.707     | 2.121  | 5.196     | 410600 |
|          | CMTK C    | 3.378 | 2.734   | 0.707     | 2.915  | 6.403     | 303820 |
|          | Elastix A | 2.547 | 2.201   | 0.707     | 2.121  | 5.000     | 364092 |
|          | Elastix B | 2.534 | 2.236   | 0.707     | 2.121  | 5.000     | 396174 |
| JRC2018  | ANTs A    | 2.420 | 2.106   | 0.707     | 2.000  | 4.743     | 408766 |
|          | ANTs B    | 3.128 | 2.713   | 0.707     | 2.550  | 6.205     | 384048 |
|          | ANTs C    | 3.450 | 3.071   | 0.707     | 2.646  | 6.819     | 379300 |
|          | CMTK A    | 2.459 | 2.190   | 0.707     | 2.121  | 4.899     | 449412 |
|          | CMTK B    | 2.465 | 2.233   | 0.707     | 2.121  | 4.796     | 421730 |
|          | CMTK C    | 2.471 | 2.173   | 0.707     | 2.121  | 4.950     | 402876 |
|          | Elastix A | 2.551 | 2.158   | 0.707     | 2.121  | 5.000     | 398878 |
|          | Elastix B | 2.616 | 2.482   | 0.707     | 2.121  | 5.148     | 389906 |
| FCWB     | ANTs A    | 2.524 | 2.465   | 0.707     | 2.121  | 5.000     | 422600 |
|          | ANTs B    | 3.848 | 3.358   | 1.000     | 3.082  | 7.246     | 303022 |
|          | ANTs C    | 3.835 | 3.391   | 1.000     | 3.000  | 7.348     | 316062 |
|          | CMTK A    | 3.217 | 2.742   | 0.707     | 2.646  | 6.325     | 393608 |
|          | CMTK B    | 3.221 | 2.928   | 0.707     | 2.646  | 6.124     | 391004 |
|          | CMTK C    | 3.130 | 2.665   | 0.707     | 2.550  | 6.124     | 336788 |
|          | Elastix A | 4.111 | 4.140   | 0.707     | 3.240  | 7.937     | 305028 |
|          | Elastix B | 3.161 | 2.643   | 0.707     | 2.550  | 6.364     | 371708 |
| Tefor    | ANTs A    | 2.495 | 2.341   | 0.707     | 2.121  | 5.000     | 426156 |
|          | ANTs B    | 3.402 | 2.944   | 0.707     | 2.828  | 6.557     | 366804 |
|          | ANTs C    | 3.480 | 3.206   | 0.707     | 2.646  | 6.745     | 414964 |
|          | CMTK A    | 3.079 | 2.677   | 0.707     | 2.449  | 6.364     | 379488 |
|          | CMTK B    | 3.319 | 3.008   | 0.707     | 2.550  | 6.964     | 363494 |
|          | CMTK C    | 3.703 | 3.878   | 0.707     | 2.646  | 6.964     | 363462 |
|          | Elastix A | 2.881 | 2.397   | 0.707     | 2.345  | 5.657     | 369246 |
|          | Elastix B | 3.062 | 2.759   | 0.707     | 2.550  | 6.000     | 344700 |

**Table S12.** FLA\_R : flange

| Template | Algorithm | Mean  | Std dev | 10th perc | median | 90th perc | N      |
|----------|-----------|-------|---------|-----------|--------|-----------|--------|
| JFRC2010 | ANTs A    | 8.661 | 6.730   | 2.345     | 6.928  | 17.132    | 475654 |
|          | ANTs B    | 6.802 | 4.843   | 2.121     | 5.745  | 12.767    | 388000 |
|          | ANTs C    | 7.298 | 4.926   | 2.121     | 6.325  | 13.583    | 458102 |
|          | CMTK A    | 8.485 | 5.918   | 2.236     | 7.106  | 16.628    | 509662 |
|          | CMTK B    | 7.640 | 5.088   | 2.121     | 6.519  | 14.832    | 460728 |
|          | CMTK C    | 7.212 | 4.914   | 2.121     | 6.083  | 13.946    | 497312 |
|          | Elastix A | 5.645 | 4.406   | 1.581     | 4.528  | 10.863    | 368684 |
|          | Elastix B | 5.415 | 4.242   | 1.581     | 4.472  | 10.296    | 403768 |
| JFRC2013 | ANTs A    | 6.053 | 5.289   | 1.581     | 4.743  | 11.937    | 442126 |
|          | ANTs B    | 6.657 | 5.179   | 1.732     | 5.385  | 13.000    | 445352 |
|          | ANTs C    | 7.051 | 5.202   | 2.000     | 5.874  | 13.528    | 444334 |
|          | CMTK A    | 7.234 | 6.544   | 1.581     | 5.196  | 15.182    | 426364 |
|          | CMTK B    | 7.264 | 6.489   | 1.732     | 5.339  | 14.866    | 424412 |
|          | CMTK C    | 6.756 | 4.706   | 2.121     | 5.701  | 12.767    | 449680 |
|          | Elastix A | 5.801 | 4.865   | 1.581     | 4.528  | 11.424    | 450286 |
|          | Elastix B | 5.711 | 4.972   | 1.414     | 4.472  | 11.336    | 482592 |
| JRC2018  | ANTs A    | 5.652 | 4.929   | 1.581     | 4.359  | 11.068    | 439706 |
|          | ANTs B    | 5.683 | 4.802   | 1.581     | 4.528  | 11.000    | 435238 |
|          | ANTs C    | 6.006 | 4.981   | 1.581     | 4.743  | 11.832    | 457370 |
|          | CMTK A    | 5.610 | 4.934   | 1.414     | 4.359  | 11.045    | 468788 |
|          | CMTK B    | 5.604 | 4.911   | 1.581     | 4.359  | 10.909    | 458608 |
|          | CMTK C    | 5.760 | 5.062   | 1.581     | 4.528  | 11.068    | 448426 |
|          | Elastix A | 5.604 | 4.814   | 1.581     | 4.359  | 10.886    | 437394 |
|          | Elastix B | 5.545 | 5.104   | 1.581     | 4.359  | 10.724    | 469178 |
| FCWB     | ANTs A    | 6.767 | 5.505   | 1.732     | 5.431  | 13.153    | 411806 |
|          | ANTs B    | 6.731 | 4.922   | 2.000     | 5.568  | 12.748    | 359238 |
|          | ANTs C    | 6.791 | 4.888   | 2.121     | 5.701  | 12.767    | 392490 |
|          | CMTK A    | 7.542 | 5.486   | 2.121     | 6.245  | 14.387    | 416848 |
|          | CMTK B    | 7.397 | 5.463   | 2.121     | 6.083  | 14.160    | 391324 |
|          | CMTK C    | 7.686 | 5.412   | 2.236     | 6.364  | 14.866    | 404082 |
|          | Elastix A | 8.417 | 7.709   | 2.121     | 6.671  | 15.827    | 426276 |
|          | Elastix B | 7.598 | 9.293   | 1.732     | 5.568  | 13.528    | 391602 |
| Tefor    | ANTs A    | 5.807 | 5.075   | 1.581     | 4.528  | 11.358    | 436920 |
|          | ANTs B    | 6.259 | 4.860   | 1.732     | 5.148  | 11.790    | 378356 |
|          | ANTs C    | 6.948 | 5.085   | 2.000     | 5.831  | 13.304    | 416008 |
|          | CMTK A    | 7.139 | 5.660   | 1.732     | 5.701  | 14.230    | 471104 |
|          | CMTK B    | 7.117 | 5.625   | 1.732     | 5.701  | 13.946    | 455220 |
|          | CMTK C    | 6.553 | 5.365   | 1.732     | 5.196  | 12.430    | 409754 |
|          | Elastix A | 5.593 | 4.687   | 1.581     | 4.416  | 10.886    | 376232 |
|          | Elastix B | 5.431 | 4.587   | 1.581     | 4.301  | 10.630    | 384092 |

**Table S13.** LOP\_R : lobula plate

| Template | Algorithm | Mean  | Std dev | 10th perc | median | 90th perc | N      |
|----------|-----------|-------|---------|-----------|--------|-----------|--------|
| JFRC2010 | ANTs A    | 5.630 | 5.639   | 1.414     | 3.808  | 13.675    | 239966 |
|          | ANTs B    | 3.587 | 2.022   | 1.225     | 3.240  | 6.245     | 267694 |
|          | ANTs C    | 3.702 | 2.098   | 1.225     | 3.464  | 6.481     | 259974 |
|          | CMTK A    | 6.327 | 7.018   | 1.581     | 4.359  | 11.336    | 246854 |
|          | CMTK B    | 5.277 | 4.698   | 1.581     | 4.062  | 9.849     | 244064 |
|          | CMTK C    | 5.338 | 4.636   | 1.581     | 4.183  | 9.721     | 246128 |
|          | Elastix A | 3.402 | 1.932   | 1.000     | 3.082  | 6.000     | 293972 |
|          | Elastix B | 4.024 | 2.695   | 1.225     | 3.536  | 7.517     | 293234 |
| JFRC2013 | ANTs A    | 3.489 | 1.992   | 1.225     | 3.240  | 6.083     | 269494 |
|          | ANTs B    | 3.909 | 2.298   | 1.414     | 3.606  | 6.964     | 287216 |
|          | ANTs C    | 3.825 | 2.245   | 1.225     | 3.536  | 6.819     | 279940 |
|          | CMTK A    | 3.627 | 2.071   | 1.225     | 3.317  | 6.364     | 263754 |
|          | CMTK B    | 3.718 | 2.138   | 1.225     | 3.464  | 6.557     | 271152 |
|          | CMTK C    | 3.374 | 2.116   | 1.000     | 2.915  | 6.205     | 355066 |
|          | Elastix A | 3.543 | 1.984   | 1.225     | 3.240  | 6.124     | 281728 |
|          | Elastix B | 3.470 | 1.948   | 1.225     | 3.240  | 6.083     | 293524 |
| JRC2018  | ANTs A    | 3.477 | 1.982   | 1.225     | 3.162  | 6.083     | 269700 |
|          | ANTs B    | 3.547 | 1.995   | 1.225     | 3.240  | 6.164     | 266400 |
|          | ANTs C    | 3.597 | 2.017   | 1.225     | 3.317  | 6.245     | 266182 |
|          | CMTK A    | 3.601 | 2.110   | 1.225     | 3.240  | 6.403     | 242150 |
|          | CMTK B    | 3.603 | 2.092   | 1.225     | 3.240  | 6.364     | 243970 |
|          | CMTK C    | 3.583 | 2.018   | 1.225     | 3.240  | 6.205     | 256428 |
|          | Elastix A | 3.558 | 1.989   | 1.225     | 3.240  | 6.124     | 265772 |
|          | Elastix B | 3.570 | 2.055   | 1.225     | 3.240  | 6.325     | 276532 |
| FCWB     | ANTs A    | 3.468 | 1.976   | 1.225     | 3.162  | 6.042     | 265968 |
|          | ANTs B    | 3.525 | 2.414   | 1.000     | 3.000  | 6.856     | 373646 |
|          | ANTs C    | 3.636 | 2.399   | 1.000     | 3.082  | 6.964     | 345156 |
|          | CMTK A    | 5.688 | 4.228   | 1.581     | 4.528  | 11.683    | 302648 |
|          | CMTK B    | 5.225 | 3.956   | 1.414     | 4.123  | 10.817    | 302658 |
|          | CMTK C    | 3.877 | 2.675   | 1.000     | 3.240  | 7.583     | 330860 |
|          | Elastix A | 4.572 | 3.166   | 1.414     | 3.873  | 8.746     | 384774 |
|          | Elastix B | 4.932 | 3.963   | 1.414     | 3.808  | 9.721     | 247436 |
| Tefor    | ANTs A    | 3.474 | 1.984   | 1.000     | 3.162  | 6.083     | 267228 |
|          | ANTs B    | 3.589 | 2.025   | 1.225     | 3.317  | 6.205     | 258562 |
|          | ANTs C    | 3.596 | 2.055   | 1.225     | 3.317  | 6.364     | 272178 |
|          | CMTK A    | 4.521 | 2.941   | 1.414     | 3.873  | 8.396     | 240954 |
|          | CMTK B    | 4.452 | 2.870   | 1.414     | 3.808  | 8.307     | 242188 |
|          | CMTK C    | 4.120 | 2.555   | 1.414     | 3.606  | 7.550     | 302688 |
|          | Elastix A | 3.495 | 2.007   | 1.225     | 3.162  | 6.124     | 281684 |
|          | Elastix B | 4.676 | 3.586   | 1.414     | 3.808  | 9.220     | 260680 |

**Table S14.** EB : ellipsoid body

| Template | Algorithm | Mean  | Std dev | 10th perc | median | 90th perc | N       |
|----------|-----------|-------|---------|-----------|--------|-----------|---------|
| JFRC2010 | ANTs A    | 5.255 | 6.244   | 1.225     | 3.464  | 10.817    | 1405498 |
|          | ANTs B    | 3.445 | 2.357   | 1.000     | 3.000  | 6.000     | 1443546 |
|          | ANTs C    | 3.525 | 2.492   | 1.225     | 3.082  | 6.083     | 1542696 |
|          | CMTK A    | 4.328 | 4.241   | 1.225     | 3.240  | 7.649     | 1383128 |
|          | CMTK B    | 4.419 | 4.625   | 1.225     | 3.240  | 7.746     | 1366692 |
|          | CMTK C    | 4.983 | 5.726   | 1.225     | 3.464  | 9.110     | 1307010 |
|          | Elastix A | 3.232 | 2.074   | 1.000     | 2.915  | 5.568     | 1456306 |
|          | Elastix B | 3.285 | 2.093   | 1.000     | 3.000  | 5.701     | 1500946 |
| JFRC2013 | ANTs A    | 3.215 | 2.012   | 1.000     | 2.915  | 5.568     | 1517212 |
|          | ANTs B    | 4.297 | 3.658   | 1.225     | 3.317  | 8.246     | 1094568 |
|          | ANTs C    | 4.446 | 4.027   | 1.225     | 3.317  | 8.746     | 1157590 |
|          | CMTK A    | 3.505 | 2.526   | 1.000     | 3.000  | 6.083     | 1436332 |
|          | CMTK B    | 3.548 | 2.519   | 1.000     | 3.082  | 6.205     | 1403924 |
|          | CMTK C    | 3.778 | 2.778   | 1.225     | 3.162  | 6.964     | 1085438 |
|          | Elastix A | 3.216 | 2.060   | 1.000     | 2.915  | 5.523     | 1497794 |
|          | Elastix B | 3.194 | 2.043   | 1.000     | 2.915  | 5.523     | 1549406 |
| JRC2018  | ANTs A    | 3.144 | 1.980   | 1.000     | 2.915  | 5.431     | 1549380 |
|          | ANTs B    | 3.343 | 2.076   | 1.000     | 3.000  | 5.745     | 1520126 |
|          | ANTs C    | 3.473 | 2.145   | 1.225     | 3.162  | 6.083     | 1530696 |
|          | CMTK A    | 3.152 | 1.987   | 1.000     | 2.915  | 5.431     | 1545220 |
|          | CMTK B    | 3.165 | 1.989   | 1.000     | 2.915  | 5.431     | 1555946 |
|          | CMTK C    | 3.213 | 2.012   | 1.000     | 2.915  | 5.523     | 1561296 |
|          | Elastix A | 3.220 | 2.019   | 1.000     | 2.915  | 5.523     | 1557730 |
|          | Elastix B | 3.201 | 2.031   | 1.000     | 2.915  | 5.523     | 1547092 |
| FCWB     | ANTs A    | 3.468 | 2.336   | 1.000     | 3.082  | 6.042     | 1524310 |
|          | ANTs B    | 3.959 | 3.016   | 1.225     | 3.240  | 7.280     | 1045354 |
|          | ANTs C    | 4.367 | 3.836   | 1.225     | 3.464  | 8.246     | 1108210 |
|          | CMTK A    | 3.575 | 2.365   | 1.225     | 3.162  | 6.205     | 1536540 |
|          | CMTK B    | 3.578 | 2.458   | 1.225     | 3.162  | 6.205     | 1510018 |
|          | CMTK C    | 3.720 | 2.562   | 1.225     | 3.240  | 6.557     | 1328746 |
|          | Elastix A | 3.644 | 2.546   | 1.225     | 3.240  | 6.364     | 1463492 |
|          | Elastix B | 3.451 | 2.230   | 1.225     | 3.082  | 6.083     | 1487654 |
| Tefor    | ANTs A    | 3.175 | 2.013   | 1.000     | 2.915  | 5.523     | 1543712 |
|          | ANTs B    | 3.390 | 2.263   | 1.000     | 3.000  | 5.874     | 1526548 |
|          | ANTs C    | 3.696 | 3.147   | 1.225     | 3.162  | 6.205     | 1584950 |
|          | CMTK A    | 3.725 | 2.591   | 1.225     | 3.240  | 6.708     | 1540136 |
|          | CMTK B    | 3.703 | 2.566   | 1.225     | 3.240  | 6.671     | 1554432 |
|          | CMTK C    | 3.884 | 3.081   | 1.225     | 3.240  | 6.964     | 1531560 |
|          | Elastix A | 3.291 | 2.106   | 1.000     | 3.000  | 5.701     | 1509564 |
|          | Elastix B | 3.646 | 2.421   | 1.225     | 3.240  | 6.519     | 1498242 |

**Table S15.** AL\_R : adult antennal lobe



| Template | Algorithm | Mean  | Std dev | 10th perc | median | 90th perc | N       |
|----------|-----------|-------|---------|-----------|--------|-----------|---------|
| JFRC2010 | ANTs A    | 6.367 | 6.837   | 1.581     | 4.743  | 11.402    | 3492090 |
|          | ANTs B    | 5.040 | 4.515   | 1.581     | 4.243  | 8.860     | 2962300 |
|          | ANTs C    | 5.358 | 4.467   | 1.581     | 4.528  | 9.513     | 3300890 |
|          | CMTK A    | 5.502 | 4.495   | 1.581     | 4.637  | 10.050    | 3257940 |
|          | CMTK B    | 5.198 | 4.364   | 1.581     | 4.528  | 9.220     | 3184846 |
|          | CMTK C    | 5.766 | 4.471   | 1.732     | 5.000  | 10.271    | 3006892 |
|          | Elastix A | 4.629 | 4.184   | 1.581     | 4.062  | 8.031     | 3067542 |
|          | Elastix B | 4.741 | 4.283   | 1.581     | 4.123  | 8.246     | 3114026 |
| JFRC2013 | ANTs A    | 4.812 | 4.251   | 1.581     | 4.123  | 8.544     | 3210516 |
|          | ANTs B    | 5.407 | 4.875   | 1.581     | 4.528  | 9.721     | 3020702 |
|          | ANTs C    | 5.796 | 4.699   | 1.732     | 5.000  | 10.344    | 3127004 |
|          | CMTK A    | 5.781 | 5.388   | 1.581     | 4.690  | 10.025    | 2897718 |
|          | CMTK B    | 6.030 | 5.700   | 1.732     | 4.796  | 10.416    | 2829810 |
|          | CMTK C    | 6.238 | 5.048   | 2.121     | 5.385  | 10.630    | 2760140 |
|          | Elastix A | 4.653 | 4.131   | 1.581     | 4.062  | 8.185     | 3280756 |
|          | Elastix B | 4.628 | 4.071   | 1.414     | 4.062  | 8.124     | 3247838 |
| JRC2018  | ANTs A    | 4.601 | 4.073   | 1.414     | 4.000  | 8.093     | 3275738 |
|          | ANTs B    | 5.017 | 4.679   | 1.581     | 4.183  | 8.775     | 3215812 |
|          | ANTs C    | 5.493 | 5.040   | 1.581     | 4.528  | 9.899     | 3275980 |
|          | CMTK A    | 4.632 | 4.189   | 1.414     | 4.062  | 8.093     | 3215146 |
|          | CMTK B    | 4.670 | 4.144   | 1.581     | 4.062  | 8.155     | 3236520 |
|          | CMTK C    | 4.832 | 4.261   | 1.581     | 4.183  | 8.515     | 3271916 |
|          | Elastix A | 4.615 | 4.321   | 1.581     | 4.062  | 7.937     | 3205366 |
|          | Elastix B | 4.653 | 4.120   | 1.581     | 4.062  | 8.093     | 3201122 |
| FCWB     | ANTs A    | 4.795 | 4.176   | 1.581     | 4.123  | 8.426     | 3302824 |
|          | ANTs B    | 5.485 | 4.647   | 1.581     | 4.690  | 9.644     | 3156232 |
|          | ANTs C    | 6.412 | 5.015   | 2.000     | 5.523  | 11.446    | 3176428 |
|          | CMTK A    | 6.061 | 5.185   | 1.732     | 5.000  | 11.068    | 3333848 |
|          | CMTK B    | 5.863 | 5.094   | 1.732     | 4.796  | 10.583    | 3310852 |
|          | CMTK C    | 6.024 | 4.836   | 1.732     | 5.196  | 10.770    | 3069468 |
|          | Elastix A | 6.627 | 6.804   | 2.000     | 5.385  | 12.490    | 3344776 |
|          | Elastix B | 5.859 | 6.269   | 1.581     | 4.690  | 10.886    | 3331994 |
| Tefor    | ANTs A    | 4.633 | 4.197   | 1.414     | 4.000  | 8.185     | 3254842 |
|          | ANTs B    | 5.102 | 4.661   | 1.581     | 4.183  | 9.055     | 2995846 |
|          | ANTs C    | 5.812 | 4.841   | 1.581     | 4.950  | 10.392    | 3193460 |
|          | CMTK A    | 6.927 | 7.527   | 1.581     | 4.743  | 14.370    | 2953692 |
|          | CMTK B    | 6.898 | 7.427   | 1.581     | 4.743  | 14.177    | 2969518 |
|          | CMTK C    | 6.883 | 8.348   | 1.581     | 4.743  | 12.124    | 2878476 |
|          | Elastix A | 4.589 | 4.112   | 1.581     | 4.000  | 8.031     | 3103026 |
|          | Elastix B | 4.674 | 4.183   | 1.581     | 4.062  | 8.185     | 3084188 |

**Table S16.** ME.R : medulla

| Template | Algorithm | Mean  | Std dev | 10th perc | median | 90th perc | N       |
|----------|-----------|-------|---------|-----------|--------|-----------|---------|
| JFRC2010 | ANTs A    | 5.048 | 5.468   | 1.000     | 3.000  | 12.410    | 1232930 |
|          | ANTs B    | 3.309 | 2.410   | 1.000     | 2.646  | 6.481     | 1139068 |
|          | ANTs C    | 3.804 | 2.625   | 1.000     | 3.162  | 7.416     | 978550  |
|          | CMTK A    | 5.801 | 6.424   | 1.000     | 3.606  | 13.077    | 980474  |
|          | CMTK B    | 5.218 | 5.666   | 1.000     | 3.240  | 11.597    | 1010442 |
|          | CMTK C    | 5.590 | 5.957   | 1.000     | 3.808  | 11.683    | 899172  |
|          | Elastix A | 2.846 | 2.128   | 0.707     | 2.345  | 5.568     | 1484426 |
|          | Elastix B | 4.096 | 3.661   | 1.000     | 2.915  | 9.055     | 1327662 |
| JFRC2013 | ANTs A    | 2.866 | 2.161   | 0.707     | 2.345  | 5.568     | 1182032 |
|          | ANTs B    | 3.689 | 2.667   | 1.000     | 3.000  | 7.314     | 1066842 |
|          | ANTs C    | 3.585 | 2.573   | 1.000     | 2.915  | 7.106     | 1061936 |
|          | CMTK A    | 3.059 | 2.334   | 0.707     | 2.550  | 6.042     | 1038332 |
|          | CMTK B    | 3.172 | 2.384   | 0.707     | 2.550  | 6.205     | 1104670 |
|          | CMTK C    | 3.088 | 2.402   | 0.707     | 2.550  | 6.205     | 1491892 |
|          | Elastix A | 2.591 | 2.023   | 0.707     | 2.121  | 5.148     | 1532410 |
|          | Elastix B | 3.130 | 2.347   | 0.707     | 2.550  | 6.245     | 1314074 |
| JRC2018  | ANTs A    | 2.852 | 2.162   | 0.707     | 2.236  | 5.568     | 1186334 |
|          | ANTs B    | 2.886 | 2.178   | 0.707     | 2.345  | 5.701     | 1202048 |
|          | ANTs C    | 3.011 | 2.261   | 0.707     | 2.449  | 5.874     | 1109464 |
|          | CMTK A    | 3.088 | 2.394   | 0.707     | 2.550  | 6.083     | 981638  |
|          | CMTK B    | 3.043 | 2.366   | 0.707     | 2.449  | 6.042     | 986594  |
|          | CMTK C    | 2.906 | 2.216   | 0.707     | 2.345  | 5.701     | 1130808 |
|          | Elastix A | 2.790 | 2.084   | 0.707     | 2.236  | 5.431     | 1350790 |
|          | Elastix B | 3.109 | 2.276   | 0.707     | 2.550  | 6.083     | 1221460 |
| FCWB     | ANTs A    | 2.883 | 2.187   | 0.707     | 2.345  | 5.701     | 1171342 |
|          | ANTs B    | 3.570 | 2.724   | 1.000     | 2.915  | 7.416     | 1313512 |
|          | ANTs C    | 3.664 | 2.666   | 1.000     | 3.000  | 7.348     | 1167140 |
|          | CMTK A    | 4.423 | 3.630   | 1.000     | 3.317  | 9.460     | 1075760 |
|          | CMTK B    | 4.064 | 3.449   | 1.000     | 3.000  | 8.718     | 1131062 |
|          | CMTK C    | 3.777 | 2.946   | 1.000     | 3.000  | 7.810     | 1222786 |
|          | Elastix A | 4.905 | 4.068   | 1.000     | 3.808  | 9.950     | 1113916 |
|          | Elastix B | 4.592 | 4.286   | 1.000     | 3.240  | 9.950     | 1104420 |
| Tefor    | ANTs A    | 2.855 | 2.166   | 0.707     | 2.236  | 5.568     | 1183568 |
|          | ANTs B    | 3.241 | 2.314   | 1.000     | 2.646  | 6.205     | 1104308 |
|          | ANTs C    | 3.460 | 2.504   | 1.000     | 2.915  | 6.671     | 1056266 |
|          | CMTK A    | 4.151 | 3.544   | 1.000     | 3.082  | 8.718     | 959660  |
|          | CMTK B    | 4.119 | 3.581   | 1.000     | 3.000  | 8.631     | 959546  |
|          | CMTK C    | 3.706 | 2.728   | 1.000     | 3.000  | 7.211     | 1116838 |
|          | Elastix A | 3.119 | 2.260   | 0.707     | 2.550  | 6.124     | 1392394 |
|          | Elastix B | 4.474 | 4.006   | 1.000     | 3.162  | 9.925     | 1202828 |

**Table S17.** FB : fan-shaped body

| Template | Algorithm | Mean  | Std dev | 10th perc | median | 90th perc | N      |
|----------|-----------|-------|---------|-----------|--------|-----------|--------|
| JFRC2010 | ANTs A    | 6.076 | 5.901   | 1.000     | 4.359  | 13.058    | 554674 |
|          | ANTs B    | 4.294 | 4.281   | 0.707     | 2.915  | 9.849     | 527882 |
|          | ANTs C    | 4.400 | 4.364   | 0.707     | 3.000  | 9.874     | 607662 |
|          | CMTK A    | 4.388 | 5.115   | 0.707     | 2.449  | 10.700    | 533858 |
|          | CMTK B    | 4.230 | 4.929   | 0.707     | 2.449  | 10.025    | 538746 |
|          | CMTK C    | 4.618 | 5.462   | 0.707     | 2.646  | 11.000    | 488598 |
|          | Elastix A | 3.670 | 4.166   | 0.707     | 2.236  | 8.544     | 479446 |
|          | Elastix B | 4.066 | 4.622   | 0.707     | 2.345  | 9.644     | 486562 |
| JFRC2013 | ANTs A    | 3.919 | 4.223   | 0.707     | 2.345  | 9.192     | 572468 |
|          | ANTs B    | 4.502 | 4.416   | 0.707     | 3.000  | 10.392    | 544380 |
|          | ANTs C    | 4.397 | 4.204   | 0.707     | 3.000  | 9.925     | 600090 |
|          | CMTK A    | 4.714 | 4.469   | 0.707     | 3.317  | 10.320    | 488296 |
|          | CMTK B    | 4.836 | 4.415   | 1.000     | 3.606  | 10.392    | 496718 |
|          | CMTK C    | 5.572 | 4.328   | 1.225     | 4.528  | 11.446    | 467410 |
|          | Elastix A | 3.777 | 4.257   | 0.707     | 2.236  | 8.746     | 520120 |
|          | Elastix B | 3.781 | 4.266   | 0.707     | 2.236  | 8.746     | 521868 |
| JRC2018  | ANTs A    | 3.668 | 4.104   | 0.707     | 2.236  | 8.396     | 567250 |
|          | ANTs B    | 4.115 | 4.200   | 0.707     | 2.828  | 9.220     | 537770 |
|          | ANTs C    | 4.129 | 4.166   | 0.707     | 2.915  | 9.301     | 605432 |
|          | CMTK A    | 3.765 | 4.167   | 0.707     | 2.345  | 8.631     | 566692 |
|          | CMTK B    | 3.674 | 4.092   | 0.707     | 2.236  | 8.367     | 559170 |
|          | CMTK C    | 3.728 | 4.005   | 0.707     | 2.345  | 8.426     | 570396 |
|          | Elastix A | 3.593 | 4.034   | 0.707     | 2.236  | 8.185     | 538056 |
|          | Elastix B | 3.699 | 4.099   | 0.707     | 2.236  | 8.544     | 536820 |
| FCWB     | ANTs A    | 4.160 | 4.482   | 0.707     | 2.646  | 9.539     | 556460 |
|          | ANTs B    | 5.174 | 4.663   | 1.000     | 3.808  | 11.203    | 508568 |
|          | ANTs C    | 5.233 | 4.592   | 1.000     | 3.873  | 11.247    | 580398 |
|          | CMTK A    | 4.882 | 4.203   | 1.000     | 3.808  | 10.000    | 531436 |
|          | CMTK B    | 4.957 | 4.259   | 1.000     | 3.873  | 10.223    | 537216 |
|          | CMTK C    | 4.685 | 4.879   | 0.707     | 3.000  | 10.770    | 519088 |
|          | Elastix A | 4.645 | 4.958   | 0.707     | 2.915  | 11.091    | 498018 |
|          | Elastix B | 4.401 | 4.801   | 0.707     | 2.646  | 10.512    | 507776 |
| Tefor    | ANTs A    | 3.653 | 4.029   | 0.707     | 2.236  | 8.396     | 581644 |
|          | ANTs B    | 4.273 | 4.032   | 0.707     | 3.000  | 9.247     | 596168 |
|          | ANTs C    | 4.294 | 4.136   | 0.707     | 3.000  | 9.460     | 685590 |
|          | CMTK A    | 4.831 | 6.287   | 0.707     | 2.236  | 12.923    | 560746 |
|          | CMTK B    | 4.883 | 6.282   | 0.707     | 2.449  | 12.530    | 564910 |
|          | CMTK C    | 4.645 | 4.783   | 0.707     | 3.082  | 10.416    | 608104 |
|          | Elastix A | 3.708 | 4.143   | 0.707     | 2.236  | 8.485     | 540494 |
|          | Elastix B | 3.954 | 4.428   | 0.707     | 2.345  | 9.327     | 533868 |

**Table S18.** SLP\_R : superior lateral protocerebrum

| Template | Algorithm | Mean  | Std dev | 10th perc | median | 90th perc | N      |
|----------|-----------|-------|---------|-----------|--------|-----------|--------|
| JFRC2010 | ANTs A    | 7.575 | 5.727   | 1.581     | 6.245  | 15.199    | 204222 |
|          | ANTs B    | 5.244 | 4.159   | 1.225     | 4.183  | 10.416    | 102366 |
|          | ANTs C    | 5.392 | 4.289   | 1.225     | 4.301  | 10.886    | 116736 |
|          | CMTK A    | 5.940 | 5.114   | 1.225     | 4.528  | 12.767    | 105298 |
|          | CMTK B    | 5.471 | 4.547   | 1.225     | 4.243  | 10.909    | 101264 |
|          | CMTK C    | 6.197 | 5.491   | 1.414     | 4.528  | 13.528    | 98082  |
|          | Elastix A | 5.209 | 4.207   | 1.225     | 4.183  | 10.271    | 104036 |
|          | Elastix B | 5.570 | 4.131   | 1.225     | 4.690  | 10.977    | 122510 |
| JFRC2013 | ANTs A    | 4.967 | 3.983   | 1.000     | 3.873  | 9.950     | 108890 |
|          | ANTs B    | 5.609 | 4.816   | 1.225     | 4.243  | 11.747    | 93530  |
|          | ANTs C    | 5.407 | 4.535   | 1.225     | 4.123  | 11.380    | 102344 |
|          | CMTK A    | 5.623 | 4.337   | 1.225     | 4.583  | 11.269    | 118528 |
|          | CMTK B    | 5.757 | 4.399   | 1.414     | 4.690  | 11.769    | 117768 |
|          | CMTK C    | 5.766 | 4.395   | 1.414     | 4.637  | 11.790    | 104072 |
|          | Elastix A | 5.003 | 4.098   | 1.000     | 3.873  | 10.025    | 113408 |
|          | Elastix B | 5.004 | 3.964   | 1.000     | 4.062  | 9.874     | 114900 |
| JRC2018  | ANTs A    | 4.809 | 3.954   | 1.000     | 3.808  | 9.618     | 111998 |
|          | ANTs B    | 5.013 | 4.123   | 1.000     | 3.873  | 10.223    | 108210 |
|          | ANTs C    | 5.263 | 4.129   | 1.225     | 4.243  | 10.630    | 109810 |
|          | CMTK A    | 4.777 | 4.025   | 1.000     | 3.674  | 9.618     | 111720 |
|          | CMTK B    | 4.790 | 4.076   | 1.000     | 3.674  | 9.618     | 107786 |
|          | CMTK C    | 4.889 | 4.121   | 1.000     | 3.808  | 9.849     | 106268 |
|          | Elastix A | 4.679 | 3.873   | 1.225     | 3.606  | 9.220     | 107928 |
|          | Elastix B | 4.810 | 3.777   | 1.225     | 3.808  | 9.487     | 114296 |
| FCWB     | ANTs A    | 6.009 | 5.202   | 1.225     | 4.472  | 12.826    | 93454  |
|          | ANTs B    | 5.783 | 5.018   | 1.225     | 4.243  | 12.767    | 87372  |
|          | ANTs C    | 5.802 | 4.799   | 1.225     | 4.472  | 12.288    | 99798  |
|          | CMTK A    | 5.872 | 4.723   | 1.581     | 4.583  | 12.104    | 102856 |
|          | CMTK B    | 5.891 | 4.753   | 1.581     | 4.528  | 12.288    | 102774 |
|          | CMTK C    | 4.843 | 4.433   | 1.000     | 3.536  | 10.392    | 118616 |
|          | Elastix A | 5.806 | 4.555   | 1.581     | 4.528  | 11.895    | 109416 |
|          | Elastix B | 5.494 | 4.143   | 1.581     | 4.528  | 10.794    | 120090 |
| Tefor    | ANTs A    | 4.873 | 3.964   | 1.000     | 3.808  | 9.874     | 115056 |
|          | ANTs B    | 4.940 | 3.859   | 1.225     | 3.873  | 9.899     | 115340 |
|          | ANTs C    | 5.046 | 4.024   | 1.225     | 4.062  | 10.392    | 128406 |
|          | CMTK A    | 6.835 | 6.888   | 1.225     | 4.528  | 15.811    | 108018 |
|          | CMTK B    | 6.723 | 6.262   | 1.225     | 4.528  | 15.716    | 108284 |
|          | CMTK C    | 5.414 | 4.475   | 1.225     | 4.183  | 11.023    | 141996 |
|          | Elastix A | 4.973 | 4.117   | 1.000     | 3.873  | 10.025    | 104854 |
|          | Elastix B | 5.432 | 4.113   | 1.225     | 4.528  | 10.817    | 115676 |

**Table S19.** SIP\_R : superior intermediate protocerebrum

| Template | Algorithm | Mean  | Std dev | 10th perc | median | 90th perc | N       |
|----------|-----------|-------|---------|-----------|--------|-----------|---------|
| JFRC2010 | ANTs A    | 4.344 | 4.449   | 0.707     | 2.915  | 10.149    | 2145362 |
|          | ANTs B    | 2.678 | 2.441   | 0.707     | 2.121  | 5.701     | 2003074 |
|          | ANTs C    | 2.726 | 2.483   | 0.707     | 2.121  | 5.788     | 2169630 |
|          | CMTK A    | 4.002 | 5.297   | 0.707     | 2.345  | 8.544     | 1631608 |
|          | CMTK B    | 3.727 | 4.456   | 0.707     | 2.236  | 8.337     | 1653970 |
|          | CMTK C    | 3.889 | 5.259   | 0.707     | 2.236  | 8.396     | 1886180 |
|          | Elastix A | 2.773 | 2.542   | 0.707     | 2.121  | 5.831     | 1719396 |
|          | Elastix B | 3.650 | 3.492   | 0.707     | 2.550  | 8.093     | 1589316 |
| JFRC2013 | ANTs A    | 2.489 | 2.351   | 0.707     | 1.732  | 5.292     | 1971190 |
|          | ANTs B    | 2.799 | 2.583   | 0.707     | 2.121  | 5.916     | 1889764 |
|          | ANTs C    | 2.804 | 2.629   | 0.707     | 2.121  | 6.042     | 1873850 |
|          | CMTK A    | 2.739 | 2.587   | 0.707     | 2.000  | 5.874     | 1856670 |
|          | CMTK B    | 2.860 | 2.638   | 0.707     | 2.121  | 6.164     | 1832456 |
|          | CMTK C    | 3.399 | 2.853   | 0.707     | 2.646  | 7.141     | 1670644 |
|          | Elastix A | 2.595 | 2.461   | 0.707     | 2.000  | 5.431     | 1868890 |
|          | Elastix B | 2.817 | 2.723   | 0.707     | 2.121  | 6.000     | 1851748 |
| JRC2018  | ANTs A    | 2.531 | 2.454   | 0.707     | 1.732  | 5.431     | 1976502 |
|          | ANTs B    | 2.569 | 2.464   | 0.707     | 2.000  | 5.431     | 1908536 |
|          | ANTs C    | 2.583 | 2.501   | 0.707     | 1.732  | 5.523     | 1983574 |
|          | CMTK A    | 2.515 | 2.362   | 0.707     | 2.000  | 5.196     | 1963182 |
|          | CMTK B    | 2.547 | 2.379   | 0.707     | 2.000  | 5.196     | 1884060 |
|          | CMTK C    | 2.598 | 2.432   | 0.707     | 2.000  | 5.385     | 1856570 |
|          | Elastix A | 2.639 | 2.456   | 0.707     | 2.000  | 5.523     | 1831450 |
|          | Elastix B | 2.779 | 2.623   | 0.707     | 2.121  | 5.874     | 1873824 |
| FCWB     | ANTs A    | 2.694 | 2.593   | 0.707     | 2.000  | 5.745     | 1984280 |
|          | ANTs B    | 3.214 | 2.842   | 0.707     | 2.449  | 6.708     | 1554920 |
|          | ANTs C    | 3.343 | 3.080   | 0.707     | 2.550  | 7.071     | 1532000 |
|          | CMTK A    | 3.123 | 2.787   | 0.707     | 2.345  | 6.557     | 1858790 |
|          | CMTK B    | 3.052 | 2.743   | 0.707     | 2.236  | 6.442     | 1759028 |
|          | CMTK C    | 3.273 | 2.850   | 0.707     | 2.449  | 7.036     | 1688338 |
|          | Elastix A | 3.892 | 3.776   | 0.707     | 2.646  | 8.631     | 1591698 |
|          | Elastix B | 3.542 | 3.348   | 0.707     | 2.550  | 7.778     | 1661438 |
| Tefor    | ANTs A    | 2.519 | 2.438   | 0.707     | 1.732  | 5.385     | 1968522 |
|          | ANTs B    | 2.654 | 2.423   | 0.707     | 2.000  | 5.701     | 2000184 |
|          | ANTs C    | 2.682 | 2.415   | 0.707     | 2.121  | 5.701     | 2215018 |
|          | CMTK A    | 3.435 | 4.027   | 0.707     | 2.236  | 7.382     | 1750938 |
|          | CMTK B    | 3.379 | 3.966   | 0.707     | 2.236  | 7.106     | 1758512 |
|          | CMTK C    | 3.123 | 3.003   | 0.707     | 2.236  | 6.708     | 1928770 |
|          | Elastix A | 2.797 | 2.604   | 0.707     | 2.121  | 5.874     | 1803676 |
|          | Elastix B | 3.623 | 3.452   | 0.707     | 2.550  | 8.185     | 1746914 |

**Table S20.** SMP\_R : superior medial protocerebrum

| Template | Algorithm | Mean  | Std dev | 10th perc | median | 90th perc | N     |
|----------|-----------|-------|---------|-----------|--------|-----------|-------|
| JFRC2010 | ANTs A    | 5.328 | 4.559   | 1.581     | 4.359  | 9.539     | 21022 |
|          | ANTs B    | 4.721 | 2.711   | 1.581     | 4.472  | 8.307     | 22324 |
|          | ANTs C    | 4.854 | 2.793   | 1.581     | 4.528  | 8.544     | 21462 |
|          | CMTK A    | 4.916 | 2.653   | 1.581     | 4.583  | 8.602     | 19230 |
|          | CMTK B    | 4.778 | 2.701   | 1.581     | 4.472  | 8.515     | 19312 |
|          | CMTK C    | 5.485 | 3.217   | 1.732     | 5.000  | 9.670     | 19076 |
|          | Elastix A | 4.435 | 2.446   | 1.581     | 4.123  | 7.906     | 20304 |
|          | Elastix B | 4.399 | 2.359   | 1.581     | 4.123  | 7.681     | 18320 |
| JFRC2013 | ANTs A    | 3.966 | 2.251   | 1.225     | 3.606  | 7.106     | 22506 |
|          | ANTs B    | 4.513 | 2.463   | 1.581     | 4.183  | 7.906     | 20674 |
|          | ANTs C    | 4.457 | 2.584   | 1.414     | 4.183  | 8.031     | 22488 |
|          | CMTK A    | 4.903 | 4.014   | 1.581     | 3.873  | 8.746     | 23436 |
|          | CMTK B    | 4.725 | 3.632   | 1.581     | 4.000  | 8.185     | 23594 |
|          | CMTK C    | 4.572 | 3.361   | 1.414     | 4.062  | 7.810     | 22442 |
|          | Elastix A | 3.940 | 2.246   | 1.225     | 3.606  | 7.106     | 22708 |
|          | Elastix B | 4.360 | 2.360   | 1.581     | 4.062  | 7.681     | 19070 |
| JRC2018  | ANTs A    | 3.985 | 2.257   | 1.225     | 3.674  | 7.106     | 22296 |
|          | ANTs B    | 4.104 | 2.348   | 1.225     | 3.808  | 7.246     | 23672 |
|          | ANTs C    | 4.189 | 2.410   | 1.225     | 3.873  | 7.517     | 25636 |
|          | CMTK A    | 4.127 | 2.239   | 1.414     | 3.808  | 7.280     | 22846 |
|          | CMTK B    | 4.110 | 2.241   | 1.414     | 3.808  | 7.211     | 22464 |
|          | CMTK C    | 4.105 | 2.268   | 1.414     | 3.808  | 7.141     | 23220 |
|          | Elastix A | 3.948 | 2.271   | 1.225     | 3.606  | 7.106     | 21308 |
|          | Elastix B | 4.300 | 2.349   | 1.581     | 4.062  | 7.583     | 19508 |
| FCWB     | ANTs A    | 3.976 | 2.155   | 1.414     | 3.674  | 7.000     | 22106 |
|          | ANTs B    | 4.863 | 2.699   | 1.581     | 4.472  | 8.660     | 15848 |
|          | ANTs C    | 5.271 | 3.076   | 1.581     | 4.899  | 9.721     | 21440 |
|          | CMTK A    | 4.842 | 3.363   | 1.581     | 4.123  | 9.083     | 20416 |
|          | CMTK B    | 4.630 | 2.956   | 1.581     | 4.123  | 8.307     | 21260 |
|          | CMTK C    | 4.759 | 2.536   | 1.581     | 4.528  | 8.337     | 18488 |
|          | Elastix A | 4.887 | 3.985   | 1.414     | 4.123  | 8.307     | 23268 |
|          | Elastix B | 4.011 | 2.391   | 1.225     | 3.606  | 7.314     | 26318 |
| Tefor    | ANTs A    | 4.222 | 2.363   | 1.414     | 3.873  | 7.517     | 20588 |
|          | ANTs B    | 4.435 | 2.530   | 1.395     | 4.183  | 7.906     | 23460 |
|          | ANTs C    | 4.775 | 2.903   | 1.414     | 4.359  | 8.888     | 36240 |
|          | CMTK A    | 5.384 | 4.025   | 1.581     | 4.528  | 9.407     | 20008 |
|          | CMTK B    | 5.079 | 3.479   | 1.581     | 4.528  | 8.944     | 19784 |
|          | CMTK C    | 4.585 | 2.997   | 1.225     | 4.123  | 8.515     | 22322 |
|          | Elastix A | 4.339 | 2.475   | 1.414     | 4.062  | 7.810     | 22868 |
|          | Elastix B | 4.434 | 2.432   | 1.581     | 4.123  | 7.810     | 19622 |

**Table S21.** AME.R : accessory medulla

| Template | Algorithm | Mean  | Std dev | 10th perc | median | 90th perc | N      |
|----------|-----------|-------|---------|-----------|--------|-----------|--------|
| JFRC2010 | ANTs A    | 7.648 | 6.824   | 1.732     | 5.568  | 16.263    | 636130 |
|          | ANTs B    | 5.618 | 3.997   | 1.581     | 4.743  | 10.886    | 609838 |
|          | ANTs C    | 5.737 | 4.157   | 1.581     | 4.743  | 11.247    | 675888 |
|          | CMTK A    | 6.115 | 4.523   | 1.581     | 5.050  | 12.104    | 690236 |
|          | CMTK B    | 6.010 | 4.515   | 1.581     | 4.950  | 12.000    | 669340 |
|          | CMTK C    | 6.487 | 5.247   | 1.581     | 5.196  | 12.767    | 577554 |
|          | Elastix A | 5.060 | 3.534   | 1.414     | 4.359  | 9.539     | 665630 |
|          | Elastix B | 5.627 | 4.177   | 1.414     | 4.637  | 11.045    | 714568 |
| JFRC2013 | ANTs A    | 4.934 | 3.495   | 1.414     | 4.183  | 9.301     | 682792 |
|          | ANTs B    | 6.238 | 4.374   | 1.581     | 5.196  | 12.124    | 610754 |
|          | ANTs C    | 6.265 | 4.588   | 1.581     | 5.196  | 12.510    | 631998 |
|          | CMTK A    | 5.675 | 4.003   | 1.581     | 4.743  | 10.840    | 639244 |
|          | CMTK B    | 5.795 | 4.097   | 1.581     | 4.950  | 11.136    | 616978 |
|          | CMTK C    | 6.599 | 4.397   | 2.000     | 5.701  | 12.430    | 491772 |
|          | Elastix A | 4.974 | 3.459   | 1.414     | 4.301  | 9.301     | 691716 |
|          | Elastix B | 4.997 | 3.527   | 1.414     | 4.243  | 9.460     | 709604 |
| JRC2018  | ANTs A    | 4.907 | 3.465   | 1.414     | 4.183  | 9.301     | 690704 |
|          | ANTs B    | 5.110 | 3.605   | 1.414     | 4.359  | 9.644     | 665526 |
|          | ANTs C    | 5.286 | 3.727   | 1.414     | 4.528  | 10.100    | 701290 |
|          | CMTK A    | 4.881 | 3.416   | 1.414     | 4.183  | 9.165     | 680930 |
|          | CMTK B    | 4.901 | 3.459   | 1.414     | 4.183  | 9.220     | 670036 |
|          | CMTK C    | 4.990 | 3.538   | 1.414     | 4.243  | 9.434     | 655926 |
|          | Elastix A | 4.956 | 3.476   | 1.414     | 4.243  | 9.301     | 669066 |
|          | Elastix B | 4.975 | 3.490   | 1.414     | 4.243  | 9.434     | 684326 |
| FCWB     | ANTs A    | 5.468 | 4.045   | 1.414     | 4.528  | 10.677    | 661724 |
|          | ANTs B    | 6.114 | 4.267   | 1.581     | 5.196  | 11.790    | 519096 |
|          | ANTs C    | 6.485 | 4.682   | 1.581     | 5.431  | 12.748    | 542078 |
|          | CMTK A    | 6.167 | 4.299   | 1.581     | 5.196  | 11.958    | 642618 |
|          | CMTK B    | 5.998 | 4.256   | 1.581     | 5.050  | 11.662    | 618072 |
|          | CMTK C    | 6.080 | 4.249   | 1.581     | 5.148  | 11.853    | 534082 |
|          | Elastix A | 6.115 | 4.193   | 1.581     | 5.196  | 11.683    | 653536 |
|          | Elastix B | 5.540 | 4.195   | 1.414     | 4.528  | 10.724    | 657850 |
| Tefor    | ANTs A    | 4.941 | 3.490   | 1.414     | 4.183  | 9.301     | 707608 |
|          | ANTs B    | 5.279 | 3.596   | 1.581     | 4.528  | 9.849     | 654438 |
|          | ANTs C    | 5.499 | 3.863   | 1.581     | 4.690  | 10.464    | 698276 |
|          | CMTK A    | 6.070 | 5.111   | 1.414     | 4.743  | 12.207    | 751188 |
|          | CMTK B    | 6.105 | 5.215   | 1.414     | 4.743  | 12.430    | 731016 |
|          | CMTK C    | 5.735 | 4.566   | 1.581     | 4.637  | 11.023    | 686572 |
|          | Elastix A | 5.028 | 3.540   | 1.414     | 4.359  | 9.460     | 667658 |
|          | Elastix B | 5.790 | 4.438   | 1.414     | 4.743  | 11.424    | 750524 |

**Table S22.** AVL\_P\_R : anterior ventrolateral protocerebrum

| Template | Algorithm | Mean  | Std dev | 10th perc | median | 90th perc | N      |
|----------|-----------|-------|---------|-----------|--------|-----------|--------|
| JFRC2010 | ANTs A    | 8.850 | 8.167   | 1.732     | 6.083  | 21.225    | 258570 |
|          | ANTs B    | 5.796 | 4.041   | 1.581     | 5.000  | 10.977    | 234778 |
|          | ANTs C    | 6.246 | 4.321   | 1.581     | 5.431  | 11.853    | 238116 |
|          | CMTK A    | 7.740 | 6.956   | 1.581     | 5.745  | 16.462    | 248546 |
|          | CMTK B    | 7.136 | 6.372   | 1.581     | 5.292  | 15.017    | 238766 |
|          | CMTK C    | 7.116 | 5.549   | 1.732     | 5.701  | 14.474    | 236602 |
|          | Elastix A | 5.201 | 3.824   | 1.414     | 4.359  | 9.950     | 255894 |
|          | Elastix B | 5.506 | 3.975   | 1.581     | 4.583  | 10.654    | 249718 |
| JFRC2013 | ANTs A    | 4.917 | 3.730   | 1.225     | 4.062  | 9.618     | 259998 |
|          | ANTs B    | 6.159 | 4.270   | 1.581     | 5.292  | 11.853    | 241008 |
|          | ANTs C    | 5.926 | 4.120   | 1.581     | 5.099  | 11.158    | 238628 |
|          | CMTK A    | 5.523 | 4.238   | 1.414     | 4.528  | 10.817    | 261984 |
|          | CMTK B    | 5.565 | 4.226   | 1.414     | 4.528  | 10.977    | 261318 |
|          | CMTK C    | 6.056 | 4.148   | 1.581     | 5.196  | 11.489    | 257662 |
|          | Elastix A | 4.986 | 3.809   | 1.225     | 4.062  | 9.721     | 257162 |
|          | Elastix B | 4.987 | 3.771   | 1.225     | 4.062  | 9.721     | 247356 |
| JRC2018  | ANTs A    | 4.949 | 3.758   | 1.225     | 4.062  | 9.644     | 261926 |
|          | ANTs B    | 5.112 | 3.790   | 1.225     | 4.243  | 9.925     | 260726 |
|          | ANTs C    | 5.137 | 3.807   | 1.225     | 4.301  | 9.950     | 255404 |
|          | CMTK A    | 4.996 | 3.717   | 1.225     | 4.123  | 9.721     | 249954 |
|          | CMTK B    | 5.002 | 3.749   | 1.225     | 4.123  | 9.823     | 250250 |
|          | CMTK C    | 5.020 | 3.780   | 1.225     | 4.123  | 9.747     | 252970 |
|          | Elastix A | 4.997 | 3.771   | 1.225     | 4.123  | 9.644     | 260550 |
|          | Elastix B | 5.043 | 3.778   | 1.225     | 4.123  | 9.874     | 251554 |
| FCWB     | ANTs A    | 5.107 | 3.833   | 1.225     | 4.183  | 10.050    | 258754 |
|          | ANTs B    | 6.447 | 4.355   | 1.732     | 5.568  | 12.186    | 225392 |
|          | ANTs C    | 6.809 | 4.569   | 1.732     | 5.874  | 12.767    | 222422 |
|          | CMTK A    | 6.412 | 4.594   | 1.581     | 5.431  | 12.227    | 241870 |
|          | CMTK B    | 6.228 | 4.468   | 1.581     | 5.196  | 12.124    | 247198 |
|          | CMTK C    | 6.431 | 4.558   | 1.581     | 5.431  | 12.510    | 223584 |
|          | Elastix A | 7.233 | 5.142   | 1.732     | 6.164  | 13.748    | 272934 |
|          | Elastix B | 5.672 | 4.057   | 1.581     | 4.743  | 11.158    | 254500 |
| Tefor    | ANTs A    | 4.970 | 3.767   | 1.225     | 4.062  | 9.644     | 265258 |
|          | ANTs B    | 5.573 | 3.957   | 1.581     | 4.743  | 10.630    | 258156 |
|          | ANTs C    | 5.740 | 4.029   | 1.581     | 4.950  | 10.909    | 255876 |
|          | CMTK A    | 7.151 | 6.753   | 1.414     | 5.000  | 16.371    | 257948 |
|          | CMTK B    | 7.290 | 7.204   | 1.414     | 4.950  | 17.000    | 253230 |
|          | CMTK C    | 6.315 | 5.193   | 1.581     | 4.950  | 13.058    | 264876 |
|          | Elastix A | 5.191 | 3.862   | 1.414     | 4.301  | 9.950     | 258122 |
|          | Elastix B | 5.595 | 4.156   | 1.414     | 4.583  | 10.977    | 250188 |

**Table S23.** PVLP\_R : posterior ventrolateral protocerebrum



| Template | Algorithm | Mean  | Std dev | 10th perc | median | 90th perc | N      |
|----------|-----------|-------|---------|-----------|--------|-----------|--------|
| JFRC2010 | ANTs A    | 6.466 | 5.088   | 1.732     | 5.000  | 13.675    | 201136 |
|          | ANTs B    | 5.086 | 3.309   | 1.732     | 4.528  | 8.718     | 175108 |
|          | ANTs C    | 5.113 | 3.279   | 1.732     | 4.528  | 8.944     | 186916 |
|          | CMTK A    | 5.684 | 4.142   | 1.732     | 4.743  | 10.607    | 180800 |
|          | CMTK B    | 5.385 | 3.625   | 1.581     | 4.690  | 9.721     | 176222 |
|          | CMTK C    | 5.692 | 3.809   | 1.732     | 5.000  | 10.416    | 174120 |
|          | Elastix A | 4.780 | 3.210   | 1.581     | 4.243  | 8.124     | 168430 |
|          | Elastix B | 4.626 | 2.993   | 1.581     | 4.183  | 7.906     | 173564 |
| JFRC2013 | ANTs A    | 4.645 | 3.065   | 1.581     | 4.183  | 7.906     | 170612 |
|          | ANTs B    | 5.310 | 3.343   | 1.732     | 4.743  | 9.247     | 189622 |
|          | ANTs C    | 5.131 | 3.290   | 1.732     | 4.583  | 8.803     | 194948 |
|          | CMTK A    | 4.812 | 3.194   | 1.581     | 4.243  | 8.337     | 177804 |
|          | CMTK B    | 4.942 | 3.330   | 1.581     | 4.359  | 8.631     | 175958 |
|          | CMTK C    | 5.533 | 3.653   | 1.732     | 4.743  | 10.000    | 181296 |
|          | Elastix A | 4.743 | 3.168   | 1.581     | 4.183  | 8.185     | 166272 |
|          | Elastix B | 4.647 | 3.050   | 1.581     | 4.183  | 7.906     | 167734 |
| JRC2018  | ANTs A    | 4.610 | 3.003   | 1.581     | 4.183  | 7.810     | 173092 |
|          | ANTs B    | 4.915 | 3.120   | 1.581     | 4.472  | 8.307     | 172192 |
|          | ANTs C    | 4.939 | 3.032   | 1.581     | 4.528  | 8.367     | 180874 |
|          | CMTK A    | 4.701 | 3.026   | 1.581     | 4.243  | 8.031     | 170442 |
|          | CMTK B    | 4.726 | 3.054   | 1.581     | 4.243  | 8.031     | 166110 |
|          | CMTK C    | 4.775 | 3.109   | 1.581     | 4.301  | 8.093     | 166222 |
|          | Elastix A | 4.690 | 3.087   | 1.581     | 4.183  | 8.031     | 167460 |
|          | Elastix B | 4.603 | 3.010   | 1.581     | 4.123  | 7.842     | 168266 |
| FCWB     | ANTs A    | 4.804 | 2.970   | 1.581     | 4.359  | 8.185     | 185122 |
|          | ANTs B    | 5.373 | 3.337   | 1.732     | 4.743  | 9.487     | 177740 |
|          | ANTs C    | 5.374 | 3.392   | 1.732     | 4.743  | 9.327     | 180198 |
|          | CMTK A    | 5.578 | 3.668   | 1.732     | 4.950  | 9.849     | 197506 |
|          | CMTK B    | 5.321 | 3.365   | 1.732     | 4.743  | 9.220     | 191900 |
|          | CMTK C    | 5.287 | 3.297   | 1.732     | 4.743  | 9.220     | 188836 |
|          | Elastix A | 5.823 | 4.310   | 1.732     | 5.000  | 10.223    | 206366 |
|          | Elastix B | 5.360 | 3.746   | 1.581     | 4.583  | 9.721     | 192782 |
| Tefor    | ANTs A    | 4.698 | 3.037   | 1.581     | 4.243  | 7.906     | 178492 |
|          | ANTs B    | 5.106 | 3.190   | 1.732     | 4.583  | 8.631     | 183638 |
|          | ANTs C    | 5.146 | 3.204   | 1.732     | 4.637  | 8.746     | 191264 |
|          | CMTK A    | 5.566 | 3.793   | 1.581     | 4.796  | 10.149    | 202582 |
|          | CMTK B    | 5.607 | 3.896   | 1.581     | 4.796  | 10.440    | 198986 |
|          | CMTK C    | 5.389 | 3.535   | 1.732     | 4.743  | 9.407     | 201050 |
|          | Elastix A | 4.763 | 3.052   | 1.581     | 4.301  | 8.031     | 164536 |
|          | Elastix B | 4.713 | 2.886   | 1.581     | 4.301  | 8.031     | 186088 |

Table S24. IVLP\_R : wedge

| Template | Algorithm | Mean  | Std dev | 10th perc | median | 90th perc | N      |
|----------|-----------|-------|---------|-----------|--------|-----------|--------|
| JFRC2010 | ANTs A    | 8.138 | 7.834   | 1.000     | 5.292  | 20.012    | 436308 |
|          | ANTs B    | 3.868 | 4.330   | 0.707     | 2.345  | 9.301     | 431512 |
|          | ANTs C    | 4.288 | 4.362   | 0.707     | 2.828  | 9.950     | 405618 |
|          | CMTK A    | 4.167 | 5.672   | 0.707     | 2.121  | 11.000    | 408410 |
|          | CMTK B    | 4.087 | 5.280   | 0.707     | 2.121  | 10.464    | 408162 |
|          | CMTK C    | 4.759 | 5.428   | 0.707     | 2.915  | 11.619    | 392684 |
|          | Elastix A | 3.515 | 4.163   | 0.707     | 2.121  | 8.337     | 420146 |
|          | Elastix B | 3.369 | 4.185   | 0.707     | 2.000  | 8.307     | 416076 |
| JFRC2013 | ANTs A    | 3.491 | 4.434   | 0.707     | 2.000  | 8.631     | 426466 |
|          | ANTs B    | 4.013 | 4.123   | 0.707     | 2.646  | 9.220     | 436614 |
|          | ANTs C    | 3.941 | 4.192   | 0.707     | 2.550  | 9.220     | 446714 |
|          | CMTK A    | 4.096 | 4.460   | 0.707     | 2.550  | 9.925     | 394782 |
|          | CMTK B    | 4.233 | 4.546   | 0.707     | 2.646  | 9.925     | 396906 |
|          | CMTK C    | 4.599 | 4.552   | 0.707     | 3.000  | 10.724    | 417880 |
|          | Elastix A | 3.444 | 4.263   | 0.707     | 2.000  | 8.485     | 407894 |
|          | Elastix B | 3.320 | 4.261   | 0.707     | 1.732  | 8.276     | 416212 |
| JRC2018  | ANTs A    | 3.424 | 4.378   | 0.707     | 1.732  | 8.573     | 433598 |
|          | ANTs B    | 3.581 | 4.304   | 0.707     | 2.121  | 8.544     | 421340 |
|          | ANTs C    | 3.550 | 4.278   | 0.707     | 2.121  | 8.544     | 437168 |
|          | CMTK A    | 3.426 | 4.491   | 0.707     | 1.732  | 8.485     | 412332 |
|          | CMTK B    | 3.393 | 4.419   | 0.707     | 1.732  | 8.276     | 408696 |
|          | CMTK C    | 3.416 | 4.308   | 0.707     | 2.000  | 8.246     | 406596 |
|          | Elastix A | 3.353 | 4.264   | 0.707     | 2.000  | 8.093     | 416490 |
|          | Elastix B | 3.350 | 4.296   | 0.707     | 1.732  | 8.185     | 411904 |
| FCWB     | ANTs A    | 3.640 | 4.550   | 0.707     | 2.121  | 9.000     | 471818 |
|          | ANTs B    | 4.230 | 4.373   | 0.707     | 2.646  | 9.849     | 425034 |
|          | ANTs C    | 4.165 | 4.300   | 0.707     | 2.646  | 9.460     | 428146 |
|          | CMTK A    | 6.287 | 6.209   | 1.000     | 4.062  | 15.067    | 357542 |
|          | CMTK B    | 5.840 | 5.666   | 1.000     | 3.873  | 13.342    | 326860 |
|          | CMTK C    | 4.421 | 5.056   | 0.707     | 2.646  | 10.700    | 408458 |
|          | Elastix A | 6.252 | 5.924   | 0.707     | 4.359  | 14.491    | 382002 |
|          | Elastix B | 4.167 | 4.870   | 0.707     | 2.236  | 10.886    | 423918 |
| Tefor    | ANTs A    | 3.436 | 4.397   | 0.707     | 1.732  | 8.631     | 443520 |
|          | ANTs B    | 3.818 | 4.130   | 0.707     | 2.345  | 9.028     | 435004 |
|          | ANTs C    | 3.974 | 4.276   | 0.707     | 2.449  | 9.460     | 434722 |
|          | CMTK A    | 4.141 | 5.693   | 0.707     | 2.121  | 10.607    | 405412 |
|          | CMTK B    | 4.286 | 5.878   | 0.707     | 2.121  | 11.068    | 406718 |
|          | CMTK C    | 4.370 | 5.011   | 0.707     | 2.550  | 10.607    | 418774 |
|          | Elastix A | 3.531 | 4.427   | 0.707     | 2.000  | 8.660     | 421524 |
|          | Elastix B | 3.351 | 4.235   | 0.707     | 1.732  | 8.485     | 416838 |

**Table S25.** PLP\_R : posterior lateral protocerebrum

| Template | Algorithm | Mean   | Std dev | 10th perc | median | 90th perc | N     |
|----------|-----------|--------|---------|-----------|--------|-----------|-------|
| JFRC2010 | ANTs A    | 13.329 | 10.282  | 2.121     | 10.863 | 28.328    | 17992 |
|          | ANTs B    | 7.807  | 8.316   | 1.000     | 4.062  | 21.331    | 14808 |
|          | ANTs C    | 8.087  | 7.943   | 1.225     | 5.000  | 20.917    | 14984 |
|          | CMTK A    | 8.705  | 8.213   | 1.225     | 5.339  | 21.953    | 16612 |
|          | CMTK B    | 9.651  | 9.371   | 1.225     | 5.385  | 25.159    | 16454 |
|          | CMTK C    | 9.807  | 9.479   | 1.581     | 5.701  | 25.060    | 13412 |
|          | Elastix A | 8.053  | 7.717   | 1.225     | 5.148  | 19.873    | 17078 |
|          | Elastix B | 7.727  | 7.692   | 1.000     | 4.528  | 20.075    | 17320 |
| JFRC2013 | ANTs A    | 7.026  | 7.092   | 1.000     | 4.301  | 17.479    | 17460 |
|          | ANTs B    | 6.472  | 7.142   | 1.000     | 3.606  | 16.703    | 14228 |
|          | ANTs C    | 6.378  | 7.364   | 1.000     | 3.240  | 17.944    | 13420 |
|          | CMTK A    | 10.651 | 9.174   | 1.414     | 7.583  | 24.208    | 19620 |
|          | CMTK B    | 10.417 | 8.960   | 1.414     | 7.681  | 23.633    | 19254 |
|          | CMTK C    | 10.034 | 8.353   | 2.000     | 7.280  | 22.372    | 18320 |
|          | Elastix A | 7.791  | 7.466   | 1.000     | 5.000  | 19.085    | 16856 |
|          | Elastix B | 7.241  | 7.267   | 1.000     | 4.472  | 18.083    | 18682 |
| JRC2018  | ANTs A    | 7.155  | 7.195   | 1.000     | 4.301  | 17.776    | 17150 |
|          | ANTs B    | 7.451  | 7.594   | 1.000     | 4.301  | 19.209    | 16210 |
|          | ANTs C    | 7.851  | 7.668   | 1.225     | 4.690  | 20.261    | 15504 |
|          | CMTK A    | 7.115  | 6.907   | 1.000     | 4.472  | 17.331    | 17054 |
|          | CMTK B    | 7.108  | 7.046   | 1.000     | 4.359  | 17.819    | 17370 |
|          | CMTK C    | 7.315  | 7.216   | 1.000     | 4.528  | 18.371    | 15946 |
|          | Elastix A | 7.141  | 7.254   | 1.000     | 4.183  | 18.044    | 16760 |
|          | Elastix B | 6.963  | 6.918   | 1.000     | 4.359  | 17.517    | 18784 |
| FCWB     | ANTs A    | 7.659  | 7.969   | 1.000     | 4.472  | 19.456    | 16620 |
|          | ANTs B    | 7.112  | 8.124   | 1.000     | 4.359  | 17.972    | 10226 |
|          | ANTs C    | 8.176  | 8.485   | 1.225     | 5.000  | 22.683    | 13788 |
|          | CMTK A    | 9.582  | 8.345   | 1.581     | 6.708  | 22.159    | 15260 |
|          | CMTK B    | 9.158  | 8.109   | 1.581     | 6.245  | 21.691    | 15174 |
|          | CMTK C    | 7.059  | 8.317   | 1.000     | 3.464  | 20.846    | 17600 |
|          | Elastix A | 8.114  | 7.969   | 1.000     | 4.796  | 21.483    | 16684 |
|          | Elastix B | 6.995  | 6.898   | 1.000     | 4.359  | 17.751    | 18760 |
| Tefor    | ANTs A    | 7.077  | 6.970   | 1.000     | 4.359  | 17.578    | 17286 |
|          | ANTs B    | 7.911  | 7.031   | 1.581     | 5.701  | 18.152    | 13698 |
|          | ANTs C    | 6.938  | 6.834   | 1.000     | 4.472  | 17.357    | 17156 |
|          | CMTK A    | 10.065 | 8.432   | 1.414     | 7.416  | 22.858    | 19664 |
|          | CMTK B    | 9.895  | 8.227   | 1.414     | 7.280  | 22.749    | 19914 |
|          | CMTK C    | 7.788  | 7.484   | 1.225     | 4.583  | 19.515    | 23164 |
|          | Elastix A | 7.023  | 7.338   | 1.000     | 3.808  | 18.155    | 18980 |
|          | Elastix B | 7.508  | 7.435   | 1.225     | 4.528  | 18.345    | 19840 |

**Table S26.** AOTU.R : anterior optic tubercle

| Template | Algorithm | Mean  | Std dev | 10th perc | median | 90th perc | N      |
|----------|-----------|-------|---------|-----------|--------|-----------|--------|
| JFRC2010 | ANTs A    | 7.788 | 8.293   | 1.225     | 5.000  | 19.962    | 113000 |
|          | ANTs B    | 3.837 | 3.175   | 0.707     | 2.915  | 8.185     | 105928 |
|          | ANTs C    | 4.132 | 3.291   | 0.707     | 3.240  | 8.775     | 103418 |
|          | CMTK A    | 5.092 | 6.903   | 0.707     | 2.915  | 11.269    | 84104  |
|          | CMTK B    | 5.052 | 6.506   | 0.707     | 2.915  | 11.068    | 85226  |
|          | CMTK C    | 5.238 | 6.329   | 1.000     | 3.162  | 11.769    | 98656  |
|          | Elastix A | 3.411 | 2.662   | 0.707     | 2.915  | 6.708     | 94852  |
|          | Elastix B | 3.594 | 2.928   | 0.707     | 2.915  | 7.246     | 88476  |
| JFRC2013 | ANTs A    | 3.239 | 2.488   | 0.707     | 2.646  | 6.671     | 101422 |
|          | ANTs B    | 4.387 | 3.451   | 1.000     | 3.536  | 9.220     | 99430  |
|          | ANTs C    | 4.344 | 3.432   | 1.000     | 3.464  | 9.220     | 97998  |
|          | CMTK A    | 3.365 | 2.706   | 0.707     | 2.646  | 7.071     | 84030  |
|          | CMTK B    | 3.425 | 2.794   | 0.707     | 2.646  | 7.106     | 86578  |
|          | CMTK C    | 4.234 | 3.308   | 1.000     | 3.536  | 8.000     | 99184  |
|          | Elastix A | 3.355 | 2.576   | 0.707     | 2.646  | 6.856     | 92320  |
|          | Elastix B | 3.236 | 2.484   | 0.707     | 2.646  | 6.671     | 90826  |
| JRC2018  | ANTs A    | 3.212 | 2.472   | 0.707     | 2.646  | 6.557     | 99712  |
|          | ANTs B    | 3.614 | 2.878   | 0.707     | 2.915  | 7.616     | 103552 |
|          | ANTs C    | 3.364 | 2.580   | 0.707     | 2.646  | 6.856     | 97756  |
|          | CMTK A    | 3.384 | 2.692   | 0.707     | 2.646  | 7.141     | 81058  |
|          | CMTK B    | 3.361 | 2.638   | 0.707     | 2.646  | 7.071     | 82722  |
|          | CMTK C    | 3.223 | 2.431   | 0.707     | 2.646  | 6.481     | 96996  |
|          | Elastix A | 3.298 | 2.399   | 0.707     | 2.828  | 6.481     | 107920 |
|          | Elastix B | 3.197 | 2.385   | 0.707     | 2.646  | 6.442     | 99008  |
| FCWB     | ANTs A    | 3.224 | 2.556   | 0.707     | 2.550  | 6.671     | 97924  |
|          | ANTs B    | 3.967 | 2.743   | 1.000     | 3.317  | 7.649     | 94372  |
|          | ANTs C    | 3.714 | 2.654   | 1.000     | 3.082  | 7.246     | 94252  |
|          | CMTK A    | 6.950 | 7.080   | 1.000     | 4.301  | 18.348    | 67048  |
|          | CMTK B    | 6.223 | 6.145   | 1.000     | 4.062  | 15.232    | 80174  |
|          | CMTK C    | 3.882 | 3.410   | 0.707     | 2.915  | 8.031     | 102780 |
|          | Elastix A | 9.584 | 9.620   | 1.000     | 5.523  | 26.182    | 86106  |
|          | Elastix B | 4.043 | 3.799   | 0.707     | 2.915  | 8.631     | 99540  |
| Tefor    | ANTs A    | 3.170 | 2.431   | 0.707     | 2.550  | 6.481     | 98684  |
|          | ANTs B    | 3.797 | 3.090   | 0.707     | 2.915  | 8.031     | 107810 |
|          | ANTs C    | 4.030 | 3.142   | 0.707     | 3.240  | 8.307     | 101590 |
|          | CMTK A    | 4.006 | 4.605   | 0.707     | 2.646  | 8.185     | 82046  |
|          | CMTK B    | 3.913 | 4.397   | 0.707     | 2.646  | 8.031     | 82136  |
|          | CMTK C    | 3.854 | 3.416   | 1.000     | 3.000  | 7.517     | 106304 |
|          | Elastix A | 3.301 | 2.545   | 0.707     | 2.646  | 6.671     | 94924  |
|          | Elastix B | 3.731 | 2.989   | 1.000     | 2.915  | 7.616     | 90522  |

Table S27. GOR\_R : gorget

| Template | Algorithm | Mean  | Std dev | 10th perc | median | 90th perc | N      |
|----------|-----------|-------|---------|-----------|--------|-----------|--------|
| JFRC2010 | ANTs A    | 4.842 | 3.579   | 1.225     | 4.000  | 9.644     | 449372 |
|          | ANTs B    | 5.478 | 4.268   | 1.414     | 4.359  | 11.091    | 284214 |
|          | ANTs C    | 4.769 | 3.397   | 1.225     | 4.062  | 9.301     | 374730 |
|          | CMTK A    | 5.117 | 4.587   | 1.000     | 3.808  | 10.724    | 364534 |
|          | CMTK B    | 4.714 | 3.852   | 1.000     | 3.674  | 9.301     | 360984 |
|          | CMTK C    | 5.814 | 5.695   | 1.225     | 4.183  | 11.597    | 292448 |
|          | Elastix A | 4.104 | 2.753   | 1.225     | 3.536  | 7.906     | 353136 |
|          | Elastix B | 3.748 | 2.496   | 1.000     | 3.240  | 7.141     | 385158 |
| JFRC2013 | ANTs A    | 5.162 | 3.945   | 1.225     | 4.123  | 10.607    | 309960 |
|          | ANTs B    | 5.486 | 4.208   | 1.414     | 4.359  | 11.068    | 312332 |
|          | ANTs C    | 5.548 | 4.330   | 1.414     | 4.359  | 11.424    | 305446 |
|          | CMTK A    | 3.896 | 2.553   | 1.000     | 3.317  | 7.416     | 238400 |
|          | CMTK B    | 4.203 | 2.846   | 1.225     | 3.606  | 8.093     | 228912 |
|          | CMTK C    | 5.285 | 3.729   | 1.414     | 4.472  | 10.271    | 184862 |
|          | Elastix A | 3.729 | 2.415   | 1.000     | 3.240  | 7.071     | 319332 |
|          | Elastix B | 3.576 | 2.326   | 1.000     | 3.082  | 6.819     | 328444 |
| JRC2018  | ANTs A    | 3.546 | 2.446   | 1.000     | 2.915  | 7.000     | 421666 |
|          | ANTs B    | 4.481 | 3.102   | 1.225     | 3.808  | 8.660     | 400478 |
|          | ANTs C    | 4.315 | 2.930   | 1.225     | 3.674  | 8.276     | 417118 |
|          | CMTK A    | 3.648 | 2.524   | 1.000     | 3.000  | 7.106     | 423462 |
|          | CMTK B    | 3.774 | 2.534   | 1.000     | 3.162  | 7.280     | 407944 |
|          | CMTK C    | 3.967 | 2.564   | 1.000     | 3.536  | 7.517     | 390700 |
|          | Elastix A | 4.153 | 2.860   | 1.000     | 3.536  | 8.093     | 400538 |
|          | Elastix B | 3.720 | 2.532   | 1.000     | 3.162  | 7.211     | 406424 |
| FCWB     | ANTs A    | 4.132 | 3.032   | 1.000     | 3.464  | 8.093     | 315408 |
|          | ANTs B    | 5.556 | 4.440   | 1.414     | 4.359  | 11.424    | 262056 |
|          | ANTs C    | 5.035 | 3.930   | 1.225     | 4.062  | 10.223    | 304860 |
|          | CMTK A    | 5.056 | 4.063   | 1.000     | 3.873  | 10.512    | 375234 |
|          | CMTK B    | 4.835 | 3.779   | 1.000     | 3.808  | 9.670     | 370578 |
|          | CMTK C    | 5.338 | 4.104   | 1.225     | 4.301  | 10.817    | 240104 |
|          | Elastix A | 6.264 | 5.314   | 1.225     | 4.583  | 14.195    | 267858 |
|          | Elastix B | 4.907 | 4.293   | 1.000     | 3.606  | 10.223    | 308952 |
| Tefor    | ANTs A    | 3.444 | 2.382   | 1.000     | 2.915  | 6.708     | 414600 |
|          | ANTs B    | 5.301 | 4.154   | 1.225     | 4.123  | 11.000    | 262940 |
|          | ANTs C    | 5.297 | 4.199   | 1.225     | 4.123  | 11.269    | 316732 |
|          | CMTK A    | 4.965 | 4.998   | 1.000     | 3.464  | 10.700    | 338350 |
|          | CMTK B    | 5.116 | 5.223   | 1.000     | 3.536  | 10.817    | 320050 |
|          | CMTK C    | 5.524 | 4.721   | 1.225     | 4.183  | 11.336    | 242994 |
|          | Elastix A | 3.923 | 2.675   | 1.000     | 3.317  | 7.517     | 344336 |
|          | Elastix B | 3.640 | 2.457   | 1.000     | 3.082  | 7.000     | 381100 |

**Table S28.** MB.CA.R : calyx of adult mushroom body

| Template | Algorithm | Mean  | Std dev | 10th perc | median | 90th perc | N      |
|----------|-----------|-------|---------|-----------|--------|-----------|--------|
| JFRC2010 | ANTs A    | 7.065 | 5.820   | 1.581     | 5.431  | 15.017    | 416104 |
|          | ANTs B    | 5.342 | 4.028   | 1.414     | 4.301  | 10.817    | 403054 |
|          | ANTs C    | 5.702 | 4.104   | 1.414     | 4.743  | 11.402    | 430918 |
|          | CMTK A    | 7.125 | 6.977   | 1.414     | 4.743  | 16.279    | 309582 |
|          | CMTK B    | 6.271 | 5.801   | 1.414     | 4.528  | 13.454    | 318590 |
|          | CMTK C    | 6.349 | 5.999   | 1.414     | 4.472  | 13.910    | 423128 |
|          | Elastix A | 4.247 | 3.271   | 1.000     | 3.536  | 8.396     | 367332 |
|          | Elastix B | 4.470 | 3.646   | 1.000     | 3.536  | 9.000     | 331736 |
| JFRC2013 | ANTs A    | 4.777 | 3.821   | 1.000     | 3.808  | 9.644     | 365592 |
|          | ANTs B    | 5.869 | 4.310   | 1.581     | 4.796  | 11.853    | 354298 |
|          | ANTs C    | 5.653 | 4.082   | 1.581     | 4.690  | 11.136    | 379870 |
|          | CMTK A    | 4.890 | 3.882   | 1.225     | 3.808  | 10.000    | 309642 |
|          | CMTK B    | 4.890 | 3.848   | 1.225     | 3.808  | 9.925     | 319706 |
|          | CMTK C    | 5.413 | 4.224   | 1.414     | 4.301  | 11.045    | 394108 |
|          | Elastix A | 4.472 | 3.561   | 1.000     | 3.606  | 8.972     | 359646 |
|          | Elastix B | 4.512 | 3.673   | 1.000     | 3.536  | 9.220     | 343302 |
| JRC2018  | ANTs A    | 4.609 | 3.635   | 1.000     | 3.606  | 9.460     | 365344 |
|          | ANTs B    | 5.140 | 3.904   | 1.225     | 4.123  | 10.392    | 368634 |
|          | ANTs C    | 5.137 | 3.830   | 1.414     | 4.183  | 10.124    | 366652 |
|          | CMTK A    | 4.998 | 3.878   | 1.225     | 4.062  | 10.124    | 313232 |
|          | CMTK B    | 4.955 | 3.877   | 1.225     | 4.000  | 10.000    | 311026 |
|          | CMTK C    | 4.998 | 3.844   | 1.225     | 4.062  | 9.925     | 329436 |
|          | Elastix A | 4.650 | 3.672   | 1.000     | 3.674  | 9.381     | 353656 |
|          | Elastix B | 4.652 | 3.781   | 1.000     | 3.606  | 9.460     | 333390 |
| FCWB     | ANTs A    | 5.113 | 3.889   | 1.225     | 4.123  | 10.271    | 392366 |
|          | ANTs B    | 5.396 | 4.056   | 1.414     | 4.359  | 10.977    | 426566 |
|          | ANTs C    | 5.244 | 3.855   | 1.414     | 4.301  | 10.512    | 415894 |
|          | CMTK A    | 6.272 | 5.706   | 1.414     | 4.690  | 13.000    | 314618 |
|          | CMTK B    | 5.998 | 5.601   | 1.414     | 4.359  | 12.530    | 331114 |
|          | CMTK C    | 5.694 | 4.890   | 1.414     | 4.301  | 12.104    | 368580 |
|          | Elastix A | 6.563 | 5.646   | 1.414     | 4.743  | 14.933    | 406550 |
|          | Elastix B | 5.316 | 4.694   | 1.000     | 3.873  | 11.247    | 386478 |
| Tefor    | ANTs A    | 4.693 | 3.644   | 1.000     | 3.808  | 9.539     | 388030 |
|          | ANTs B    | 5.100 | 3.892   | 1.225     | 4.123  | 10.247    | 446012 |
|          | ANTs C    | 5.550 | 4.065   | 1.414     | 4.528  | 10.977    | 415622 |
|          | CMTK A    | 5.513 | 4.931   | 1.225     | 4.123  | 11.597    | 323322 |
|          | CMTK B    | 5.493 | 4.770   | 1.225     | 4.123  | 11.424    | 327944 |
|          | CMTK C    | 5.336 | 4.139   | 1.414     | 4.243  | 10.724    | 438296 |
|          | Elastix A | 4.558 | 3.545   | 1.000     | 3.606  | 9.000     | 352978 |
|          | Elastix B | 4.667 | 3.701   | 1.000     | 3.674  | 9.301     | 317442 |

**Table S29.** SPS.R : superior posterior slope

| Template | Algorithm | Mean  | Std dev | 10th perc | median | 90th perc | N      |
|----------|-----------|-------|---------|-----------|--------|-----------|--------|
| JFRC2010 | ANTs A    | 8.126 | 5.735   | 2.121     | 6.671  | 16.401    | 342866 |
|          | ANTs B    | 6.740 | 4.685   | 1.732     | 5.701  | 13.342    | 245712 |
|          | ANTs C    | 7.951 | 5.083   | 2.449     | 6.856  | 15.182    | 201122 |
|          | CMTK A    | 7.647 | 5.359   | 2.000     | 6.205  | 15.668    | 229274 |
|          | CMTK B    | 7.248 | 5.118   | 1.732     | 5.831  | 14.983    | 231834 |
|          | CMTK C    | 7.370 | 4.969   | 2.000     | 6.205  | 14.714    | 222776 |
|          | Elastix A | 4.699 | 3.819   | 1.000     | 3.606  | 9.925     | 306590 |
|          | Elastix B | 4.888 | 4.050   | 1.225     | 3.674  | 10.416    | 308932 |
| JFRC2013 | ANTs A    | 5.746 | 4.481   | 1.414     | 4.528  | 12.166    | 301130 |
|          | ANTs B    | 7.402 | 4.879   | 2.236     | 6.205  | 14.577    | 219492 |
|          | ANTs C    | 7.204 | 4.724   | 2.121     | 6.124  | 13.946    | 230954 |
|          | CMTK A    | 5.630 | 4.317   | 1.414     | 4.528  | 11.576    | 282136 |
|          | CMTK B    | 5.786 | 4.335   | 1.581     | 4.690  | 11.705    | 277218 |
|          | CMTK C    | 6.513 | 4.554   | 1.732     | 5.339  | 13.134    | 293938 |
|          | Elastix A | 4.714 | 3.943   | 1.000     | 3.606  | 10.000    | 325016 |
|          | Elastix B | 4.913 | 4.014   | 1.000     | 3.808  | 10.512    | 302166 |
| JRC2018  | ANTs A    | 4.866 | 3.894   | 1.225     | 3.808  | 10.025    | 313820 |
|          | ANTs B    | 6.137 | 4.565   | 1.581     | 5.000  | 12.550    | 273266 |
|          | ANTs C    | 6.024 | 4.265   | 1.581     | 5.000  | 11.832    | 268456 |
|          | CMTK A    | 5.262 | 4.008   | 1.414     | 4.243  | 10.512    | 290294 |
|          | CMTK B    | 5.347 | 4.095   | 1.414     | 4.301  | 10.724    | 271122 |
|          | CMTK C    | 5.732 | 4.272   | 1.581     | 4.583  | 11.489    | 249432 |
|          | Elastix A | 4.668 | 3.871   | 1.000     | 3.606  | 9.721     | 322516 |
|          | Elastix B | 4.906 | 3.956   | 1.225     | 3.808  | 10.223    | 304868 |
| FCWB     | ANTs A    | 5.664 | 4.176   | 1.414     | 4.583  | 11.424    | 323078 |
|          | ANTs B    | 6.484 | 4.423   | 1.732     | 5.431  | 12.728    | 261148 |
|          | ANTs C    | 6.926 | 4.620   | 2.121     | 5.916  | 13.229    | 225102 |
|          | CMTK A    | 7.538 | 5.218   | 2.000     | 6.245  | 15.248    | 304856 |
|          | CMTK B    | 6.912 | 4.943   | 1.732     | 5.701  | 14.053    | 299012 |
|          | CMTK C    | 6.947 | 4.662   | 2.000     | 5.874  | 13.675    | 254194 |
|          | Elastix A | 7.752 | 5.436   | 2.121     | 6.519  | 15.297    | 333362 |
|          | Elastix B | 6.437 | 5.103   | 1.581     | 5.000  | 13.583    | 373960 |
| Tefor    | ANTs A    | 5.070 | 3.997   | 1.225     | 4.062  | 10.536    | 320492 |
|          | ANTs B    | 6.728 | 4.517   | 2.000     | 5.701  | 13.172    | 265242 |
|          | ANTs C    | 7.193 | 4.684   | 2.121     | 6.124  | 13.730    | 240284 |
|          | CMTK A    | 7.271 | 6.902   | 1.414     | 4.796  | 17.000    | 316638 |
|          | CMTK B    | 7.316 | 6.931   | 1.581     | 4.950  | 17.015    | 312412 |
|          | CMTK C    | 6.579 | 5.477   | 1.581     | 5.000  | 14.036    | 346162 |
|          | Elastix A | 4.592 | 3.740   | 1.000     | 3.606  | 9.513     | 324824 |
|          | Elastix B | 4.867 | 3.865   | 1.225     | 3.808  | 10.025    | 317084 |

Table S30. IPS\_R : inferior posterior slope

| Template | Algorithm | Mean  | Std dev | 10th perc | median | 90th perc | N      |
|----------|-----------|-------|---------|-----------|--------|-----------|--------|
| JFRC2010 | ANTs A    | 6.050 | 5.921   | 0.707     | 3.873  | 14.491    | 315090 |
|          | ANTs B    | 2.961 | 3.347   | 0.707     | 1.732  | 6.856     | 335148 |
|          | ANTs C    | 3.032 | 3.282   | 0.707     | 2.000  | 6.964     | 312856 |
|          | CMTK A    | 3.547 | 5.024   | 0.707     | 1.581  | 9.899     | 333098 |
|          | CMTK B    | 3.487 | 4.911   | 0.707     | 1.581  | 9.110     | 333226 |
|          | CMTK C    | 3.763 | 4.899   | 0.707     | 2.000  | 9.460     | 325342 |
|          | Elastix A | 2.674 | 3.202   | 0.707     | 1.581  | 6.042     | 325408 |
|          | Elastix B | 2.968 | 3.756   | 0.707     | 1.581  | 7.036     | 327182 |
| JFRC2013 | ANTs A    | 2.535 | 2.978   | 0.707     | 1.581  | 5.745     | 345434 |
|          | ANTs B    | 3.090 | 3.512   | 0.707     | 1.732  | 7.314     | 316090 |
|          | ANTs C    | 3.092 | 3.441   | 0.707     | 2.000  | 7.211     | 326860 |
|          | CMTK A    | 2.849 | 3.231   | 0.707     | 1.732  | 6.164     | 343224 |
|          | CMTK B    | 3.025 | 3.283   | 0.707     | 2.121  | 6.519     | 338554 |
|          | CMTK C    | 3.707 | 3.545   | 0.707     | 2.646  | 7.937     | 299000 |
|          | Elastix A | 2.616 | 3.048   | 0.707     | 1.581  | 5.874     | 339380 |
|          | Elastix B | 2.640 | 3.116   | 0.707     | 1.581  | 5.831     | 352042 |
| JRC2018  | ANTs A    | 2.446 | 2.855   | 0.707     | 1.581  | 5.431     | 347798 |
|          | ANTs B    | 2.720 | 2.903   | 0.707     | 1.732  | 5.874     | 345134 |
|          | ANTs C    | 2.757 | 2.925   | 0.707     | 1.732  | 6.083     | 351358 |
|          | CMTK A    | 2.463 | 2.939   | 0.707     | 1.581  | 5.431     | 346020 |
|          | CMTK B    | 2.466 | 2.979   | 0.707     | 1.581  | 5.431     | 346934 |
|          | CMTK C    | 2.513 | 3.020   | 0.707     | 1.581  | 5.568     | 343496 |
|          | Elastix A | 2.603 | 3.102   | 0.707     | 1.581  | 5.701     | 340310 |
|          | Elastix B | 2.645 | 3.127   | 0.707     | 1.581  | 5.831     | 348782 |
| FCWB     | ANTs A    | 3.277 | 3.556   | 0.707     | 2.121  | 7.517     | 301648 |
|          | ANTs B    | 3.632 | 3.923   | 0.707     | 2.236  | 8.631     | 288116 |
|          | ANTs C    | 3.550 | 3.730   | 0.707     | 2.236  | 8.276     | 304246 |
|          | CMTK A    | 4.284 | 4.827   | 0.707     | 2.550  | 10.654    | 244114 |
|          | CMTK B    | 4.021 | 4.340   | 0.707     | 2.550  | 9.434     | 250492 |
|          | CMTK C    | 3.317 | 3.993   | 0.707     | 2.000  | 7.416     | 317350 |
|          | Elastix A | 4.578 | 5.212   | 0.707     | 2.550  | 11.832    | 270764 |
|          | Elastix B | 3.208 | 4.433   | 0.707     | 1.732  | 7.211     | 316894 |
| Tefor    | ANTs A    | 2.496 | 2.879   | 0.707     | 1.581  | 5.523     | 349796 |
|          | ANTs B    | 2.749 | 3.009   | 0.707     | 1.732  | 6.124     | 334934 |
|          | ANTs C    | 2.853 | 3.174   | 0.707     | 1.732  | 6.442     | 345290 |
|          | CMTK A    | 3.185 | 4.757   | 0.707     | 1.581  | 7.036     | 336610 |
|          | CMTK B    | 3.206 | 4.688   | 0.707     | 1.581  | 7.517     | 331342 |
|          | CMTK C    | 3.161 | 4.003   | 0.707     | 2.000  | 6.708     | 339266 |
|          | Elastix A | 2.631 | 3.229   | 0.707     | 1.581  | 5.874     | 334922 |
|          | Elastix B | 2.947 | 3.491   | 0.707     | 1.732  | 7.000     | 321002 |

**Table S31.** SCL\_R : superior clamp



| Template | Algorithm | Mean  | Std dev | 10th perc | median | 90th perc | N      |
|----------|-----------|-------|---------|-----------|--------|-----------|--------|
| JFRC2010 | ANTs A    | 8.079 | 8.073   | 1.581     | 5.196  | 19.300    | 765240 |
|          | ANTs B    | 5.244 | 4.284   | 1.581     | 4.183  | 9.950     | 635108 |
|          | ANTs C    | 5.892 | 4.745   | 1.581     | 4.583  | 11.937    | 612046 |
|          | CMTK A    | 8.762 | 7.817   | 1.732     | 5.874  | 20.857    | 674518 |
|          | CMTK B    | 7.278 | 6.555   | 1.581     | 5.148  | 16.202    | 633590 |
|          | CMTK C    | 7.782 | 6.612   | 1.732     | 5.745  | 16.523    | 709042 |
|          | Elastix A | 4.646 | 3.713   | 1.414     | 3.808  | 8.515     | 600342 |
|          | Elastix B | 4.479 | 3.533   | 1.414     | 3.674  | 8.185     | 611184 |
| JFRC2013 | ANTs A    | 4.590 | 4.037   | 1.225     | 3.606  | 8.515     | 630492 |
|          | ANTs B    | 5.339 | 4.529   | 1.581     | 4.123  | 10.512    | 625254 |
|          | ANTs C    | 5.221 | 4.461   | 1.414     | 4.123  | 10.025    | 601610 |
|          | CMTK A    | 6.059 | 5.748   | 1.581     | 4.243  | 13.304    | 689216 |
|          | CMTK B    | 6.337 | 6.124   | 1.581     | 4.359  | 14.457    | 681688 |
|          | CMTK C    | 5.830 | 4.451   | 1.581     | 4.583  | 11.790    | 660042 |
|          | Elastix A | 4.439 | 3.599   | 1.225     | 3.606  | 7.937     | 639570 |
|          | Elastix B | 4.400 | 3.598   | 1.225     | 3.606  | 7.937     | 654960 |
| JRC2018  | ANTs A    | 4.368 | 3.696   | 1.225     | 3.606  | 7.906     | 633808 |
|          | ANTs B    | 4.542 | 3.821   | 1.414     | 3.606  | 8.307     | 649512 |
|          | ANTs C    | 4.659 | 3.911   | 1.414     | 3.808  | 8.544     | 633012 |
|          | CMTK A    | 4.361 | 3.625   | 1.225     | 3.606  | 7.906     | 650942 |
|          | CMTK B    | 4.359 | 3.594   | 1.225     | 3.606  | 7.906     | 628218 |
|          | CMTK C    | 4.443 | 3.657   | 1.225     | 3.606  | 8.062     | 623624 |
|          | Elastix A | 4.386 | 3.570   | 1.225     | 3.606  | 7.842     | 649538 |
|          | Elastix B | 4.541 | 3.737   | 1.414     | 3.674  | 8.185     | 644400 |
| FCWB     | ANTs A    | 4.659 | 4.054   | 1.225     | 3.606  | 8.631     | 629916 |
|          | ANTs B    | 5.370 | 4.123   | 1.581     | 4.359  | 10.025    | 738100 |
|          | ANTs C    | 6.037 | 4.515   | 1.732     | 4.950  | 11.597    | 704222 |
|          | CMTK A    | 8.843 | 7.562   | 1.732     | 6.164  | 20.408    | 621926 |
|          | CMTK B    | 7.667 | 6.647   | 1.732     | 5.339  | 17.692    | 579792 |
|          | CMTK C    | 6.573 | 5.154   | 1.732     | 5.099  | 13.620    | 739520 |
|          | Elastix A | 8.836 | 7.008   | 2.121     | 6.708  | 18.520    | 766336 |
|          | Elastix B | 7.715 | 7.530   | 1.581     | 5.148  | 17.776    | 692590 |
| Tefor    | ANTs A    | 4.395 | 3.671   | 1.225     | 3.606  | 8.031     | 639674 |
|          | ANTs B    | 4.926 | 4.055   | 1.414     | 3.873  | 9.220     | 612498 |
|          | ANTs C    | 5.096 | 4.334   | 1.414     | 4.062  | 9.644     | 582010 |
|          | CMTK A    | 7.184 | 6.627   | 1.581     | 4.796  | 16.688    | 722676 |
|          | CMTK B    | 7.202 | 6.647   | 1.581     | 4.950  | 16.583    | 714756 |
|          | CMTK C    | 6.569 | 5.881   | 1.581     | 4.690  | 14.577    | 613750 |
|          | Elastix A | 4.570 | 3.677   | 1.414     | 3.808  | 8.307     | 597264 |
|          | Elastix B | 4.457 | 3.577   | 1.225     | 3.606  | 8.093     | 613856 |

Table S32. LO\_R : lobula

| Template | Algorithm | Mean   | Std dev | 10th perc | median | 90th perc | N     |
|----------|-----------|--------|---------|-----------|--------|-----------|-------|
| JFRC2010 | ANTs A    | 10.110 | 9.192   | 1.581     | 7.000  | 24.870    | 20032 |
|          | ANTs B    | 5.442  | 5.156   | 1.000     | 3.606  | 13.229    | 15862 |
|          | ANTs C    | 7.146  | 6.935   | 1.000     | 4.123  | 18.507    | 13508 |
|          | CMTK A    | 6.936  | 9.153   | 1.000     | 3.240  | 18.180    | 12426 |
|          | CMTK B    | 6.429  | 8.057   | 1.000     | 3.240  | 15.716    | 12974 |
|          | CMTK C    | 6.017  | 6.591   | 1.000     | 3.536  | 15.379    | 10854 |
|          | Elastix A | 3.909  | 3.004   | 1.000     | 3.162  | 7.810     | 16124 |
|          | Elastix B | 4.172  | 2.910   | 1.000     | 3.536  | 8.307     | 22564 |
| JFRC2013 | ANTs A    | 3.902  | 3.014   | 1.000     | 3.000  | 8.276     | 20466 |
|          | ANTs B    | 7.986  | 6.650   | 1.732     | 5.568  | 19.157    | 10842 |
|          | ANTs C    | 8.399  | 6.698   | 1.581     | 5.701  | 18.722    | 12826 |
|          | CMTK A    | 3.623  | 2.706   | 1.000     | 2.915  | 7.649     | 16792 |
|          | CMTK B    | 3.685  | 2.840   | 1.000     | 2.915  | 7.681     | 17748 |
|          | CMTK C    | 5.969  | 5.275   | 1.225     | 4.359  | 12.590    | 16420 |
|          | Elastix A | 3.793  | 2.980   | 1.000     | 2.915  | 8.031     | 21572 |
|          | Elastix B | 3.781  | 3.007   | 1.000     | 2.915  | 8.093     | 21214 |
| JRC2018  | ANTs A    | 3.883  | 2.876   | 1.000     | 3.082  | 8.031     | 20550 |
|          | ANTs B    | 4.840  | 4.506   | 1.000     | 3.240  | 11.023    | 19126 |
|          | ANTs C    | 4.767  | 4.333   | 1.000     | 3.536  | 10.000    | 16668 |
|          | CMTK A    | 3.478  | 2.658   | 0.707     | 2.915  | 7.036     | 17250 |
|          | CMTK B    | 3.395  | 2.573   | 0.707     | 2.646  | 7.036     | 17552 |
|          | CMTK C    | 3.707  | 2.808   | 1.000     | 2.915  | 7.906     | 18484 |
|          | Elastix A | 3.956  | 3.037   | 1.000     | 3.000  | 8.396     | 18924 |
|          | Elastix B | 3.709  | 2.816   | 1.000     | 2.915  | 7.649     | 19554 |
| FCWB     | ANTs A    | 4.427  | 3.643   | 1.000     | 3.240  | 9.407     | 18974 |
|          | ANTs B    | 5.636  | 4.773   | 1.414     | 4.183  | 12.266    | 20592 |
|          | ANTs C    | 5.450  | 4.966   | 1.000     | 3.873  | 12.207    | 20774 |
|          | CMTK A    | 5.640  | 5.752   | 1.000     | 3.808  | 12.826    | 11616 |
|          | CMTK B    | 6.464  | 5.187   | 1.414     | 5.050  | 12.981    | 14828 |
|          | CMTK C    | 5.664  | 5.591   | 1.000     | 3.536  | 13.601    | 20246 |
|          | Elastix A | 11.371 | 8.555   | 1.225     | 10.392 | 23.611    | 14924 |
|          | Elastix B | 7.076  | 5.746   | 1.000     | 5.196  | 15.588    | 27258 |
| Tefor    | ANTs A    | 3.765  | 2.803   | 1.000     | 3.000  | 7.906     | 20450 |
|          | ANTs B    | 6.679  | 6.131   | 1.000     | 4.301  | 15.906    | 15576 |
|          | ANTs C    | 6.193  | 5.221   | 1.414     | 4.610  | 13.366    | 14578 |
|          | CMTK A    | 5.613  | 8.651   | 0.707     | 2.646  | 10.794    | 15534 |
|          | CMTK B    | 5.580  | 8.523   | 0.707     | 2.646  | 10.607    | 16134 |
|          | CMTK C    | 5.280  | 4.433   | 1.000     | 4.000  | 11.180    | 20264 |
|          | Elastix A | 4.129  | 3.043   | 1.000     | 3.240  | 8.746     | 19768 |
|          | Elastix B | 4.306  | 3.201   | 1.000     | 3.536  | 8.718     | 20036 |

Table S33. EPA\_R : epalette

| Template | Algorithm | Mean  | Std dev | 10th perc | median | 90th perc | N       |
|----------|-----------|-------|---------|-----------|--------|-----------|---------|
| JFRC2010 | ANTs A    | 7.024 | 5.606   | 1.732     | 5.568  | 13.802    | 1889608 |
|          | ANTs B    | 6.817 | 4.626   | 2.121     | 5.788  | 12.748    | 1696632 |
|          | ANTs C    | 6.951 | 4.770   | 2.121     | 5.874  | 13.077    | 1812676 |
|          | CMTK A    | 6.567 | 4.732   | 1.732     | 5.431  | 12.767    | 1859654 |
|          | CMTK B    | 6.409 | 4.684   | 1.732     | 5.292  | 12.369    | 1736788 |
|          | CMTK C    | 6.917 | 4.713   | 2.121     | 5.874  | 13.000    | 1711540 |
|          | Elastix A | 5.671 | 4.258   | 1.581     | 4.583  | 11.045    | 1588272 |
|          | Elastix B | 5.702 | 4.328   | 1.581     | 4.583  | 11.180    | 1604856 |
| JFRC2013 | ANTs A    | 5.917 | 4.639   | 1.581     | 4.743  | 11.853    | 1676118 |
|          | ANTs B    | 7.171 | 5.031   | 2.121     | 6.000  | 13.601    | 1611632 |
|          | ANTs C    | 7.246 | 5.104   | 2.121     | 6.083  | 13.802    | 1658494 |
|          | CMTK A    | 5.859 | 4.324   | 1.581     | 4.796  | 11.336    | 1614130 |
|          | CMTK B    | 5.933 | 4.318   | 1.581     | 4.950  | 11.402    | 1613038 |
|          | CMTK C    | 6.907 | 4.692   | 2.121     | 5.831  | 13.058    | 1507918 |
|          | Elastix A | 5.507 | 4.373   | 1.581     | 4.359  | 10.863    | 1641038 |
|          | Elastix B | 5.450 | 4.396   | 1.414     | 4.301  | 10.817    | 1621388 |
| JRC2018  | ANTs A    | 5.419 | 4.431   | 1.414     | 4.243  | 10.886    | 1645444 |
|          | ANTs B    | 6.766 | 4.646   | 2.000     | 5.701  | 12.826    | 1637668 |
|          | ANTs C    | 6.908 | 4.798   | 2.121     | 5.788  | 13.115    | 1688056 |
|          | CMTK A    | 5.416 | 4.405   | 1.414     | 4.243  | 10.817    | 1654410 |
|          | CMTK B    | 5.454 | 4.421   | 1.581     | 4.301  | 10.817    | 1601386 |
|          | CMTK C    | 5.715 | 4.440   | 1.581     | 4.528  | 11.136    | 1595976 |
|          | Elastix A | 5.504 | 4.367   | 1.581     | 4.359  | 10.817    | 1570950 |
|          | Elastix B | 5.533 | 4.386   | 1.581     | 4.359  | 10.886    | 1596056 |
| FCWB     | ANTs A    | 5.715 | 4.390   | 1.581     | 4.583  | 11.180    | 1668296 |
|          | ANTs B    | 6.499 | 4.468   | 2.121     | 5.523  | 12.166    | 1722224 |
|          | ANTs C    | 6.654 | 4.623   | 2.121     | 5.568  | 12.510    | 1752242 |
|          | CMTK A    | 6.772 | 4.818   | 2.000     | 5.701  | 13.000    | 1771876 |
|          | CMTK B    | 6.638 | 4.791   | 2.000     | 5.523  | 12.689    | 1691152 |
|          | CMTK C    | 6.546 | 4.528   | 2.000     | 5.523  | 12.590    | 1636296 |
|          | Elastix A | 7.302 | 5.378   | 2.121     | 6.083  | 13.802    | 1681564 |
|          | Elastix B | 6.459 | 4.579   | 1.732     | 5.385  | 12.410    | 1917728 |
| Tefor    | ANTs A    | 5.610 | 4.474   | 1.581     | 4.472  | 11.158    | 1660500 |
|          | ANTs B    | 7.064 | 4.853   | 2.121     | 6.000  | 13.304    | 1680796 |
|          | ANTs C    | 7.435 | 5.237   | 2.121     | 6.205  | 14.213    | 1731516 |
|          | CMTK A    | 6.500 | 5.088   | 1.581     | 5.148  | 13.210    | 1815200 |
|          | CMTK B    | 6.564 | 5.118   | 1.581     | 5.148  | 13.285    | 1809270 |
|          | CMTK C    | 7.222 | 5.560   | 2.121     | 5.831  | 13.892    | 1738810 |
|          | Elastix A | 5.597 | 4.333   | 1.581     | 4.528  | 10.977    | 1646730 |
|          | Elastix B | 6.153 | 4.573   | 1.581     | 5.000  | 12.062    | 1619762 |

**Table S34.** GNG : adult gnathal ganglion

| Template | Algorithm | Mean  | Std dev | 10th perc | median | 90th perc | N     |
|----------|-----------|-------|---------|-----------|--------|-----------|-------|
| JFRC2010 | ANTs A    | 5.224 | 4.249   | 1.000     | 4.062  | 10.977    | 43164 |
|          | ANTs B    | 4.061 | 3.022   | 1.000     | 3.464  | 7.906     | 51038 |
|          | ANTs C    | 4.322 | 3.015   | 1.225     | 3.674  | 8.093     | 51848 |
|          | CMTK A    | 5.213 | 3.991   | 1.414     | 4.183  | 10.271    | 53416 |
|          | CMTK B    | 4.750 | 3.427   | 1.225     | 4.062  | 9.028     | 52090 |
|          | CMTK C    | 4.946 | 3.577   | 1.414     | 4.123  | 9.301     | 56954 |
|          | Elastix A | 3.603 | 2.707   | 1.000     | 3.000  | 6.745     | 50786 |
|          | Elastix B | 3.363 | 2.412   | 1.000     | 2.915  | 6.124     | 52898 |
| JFRC2013 | ANTs A    | 3.577 | 2.998   | 1.000     | 2.915  | 6.964     | 43970 |
|          | ANTs B    | 4.209 | 2.729   | 1.414     | 3.808  | 7.550     | 60532 |
|          | ANTs C    | 4.321 | 2.589   | 1.414     | 4.000  | 7.778     | 59536 |
|          | CMTK A    | 3.938 | 3.282   | 1.000     | 3.162  | 7.616     | 38334 |
|          | CMTK B    | 3.967 | 3.216   | 1.000     | 3.240  | 7.616     | 39398 |
|          | CMTK C    | 3.997 | 2.608   | 1.225     | 3.606  | 7.141     | 57542 |
|          | Elastix A | 3.657 | 2.926   | 1.000     | 3.000  | 7.000     | 55624 |
|          | Elastix B | 3.664 | 2.828   | 1.000     | 3.000  | 7.036     | 48880 |
| JRC2018  | ANTs A    | 3.536 | 2.998   | 0.707     | 2.915  | 6.928     | 44366 |
|          | ANTs B    | 3.941 | 3.021   | 1.000     | 3.240  | 7.616     | 47364 |
|          | ANTs C    | 4.016 | 3.119   | 1.000     | 3.317  | 7.649     | 43868 |
|          | CMTK A    | 4.200 | 3.509   | 1.000     | 3.536  | 7.937     | 33850 |
|          | CMTK B    | 4.138 | 3.534   | 1.000     | 3.317  | 7.906     | 34784 |
|          | CMTK C    | 3.831 | 3.216   | 1.000     | 3.082  | 7.382     | 39328 |
|          | Elastix A | 3.709 | 2.918   | 1.000     | 3.000  | 7.071     | 48002 |
|          | Elastix B | 3.757 | 2.986   | 1.000     | 3.082  | 7.106     | 43726 |
| FCWB     | ANTs A    | 3.741 | 3.325   | 0.707     | 2.915  | 7.314     | 41796 |
|          | ANTs B    | 3.957 | 2.289   | 1.414     | 3.606  | 7.106     | 63002 |
|          | ANTs C    | 4.189 | 2.394   | 1.414     | 3.808  | 7.517     | 59292 |
|          | CMTK A    | 5.897 | 4.179   | 1.581     | 5.339  | 10.271    | 67418 |
|          | CMTK B    | 5.304 | 3.810   | 1.414     | 4.528  | 9.925     | 48736 |
|          | CMTK C    | 4.471 | 2.809   | 1.414     | 4.062  | 8.062     | 55758 |
|          | Elastix A | 4.392 | 2.908   | 1.225     | 3.808  | 8.307     | 98264 |
|          | Elastix B | 4.422 | 3.122   | 1.225     | 3.808  | 8.367     | 61480 |
| Tefor    | ANTs A    | 3.479 | 2.937   | 0.707     | 2.915  | 6.745     | 44098 |
|          | ANTs B    | 4.101 | 3.041   | 1.000     | 3.536  | 7.906     | 50334 |
|          | ANTs C    | 4.229 | 3.220   | 1.000     | 3.536  | 8.276     | 45398 |
|          | CMTK A    | 4.588 | 3.424   | 1.225     | 3.808  | 8.868     | 42418 |
|          | CMTK B    | 4.754 | 3.476   | 1.225     | 4.062  | 9.110     | 44458 |
|          | CMTK C    | 4.581 | 3.167   | 1.225     | 3.873  | 8.746     | 58062 |
|          | Elastix A | 3.498 | 2.564   | 1.000     | 3.000  | 6.442     | 52472 |
|          | Elastix B | 3.616 | 2.450   | 1.000     | 3.162  | 6.557     | 57842 |

**Table S35.** NO : nodulus

| Template | Algorithm | Mean  | Std dev | 10th perc | median | 90th perc | N      |
|----------|-----------|-------|---------|-----------|--------|-----------|--------|
| JFRC2010 | ANTs A    | 5.451 | 6.308   | 1.414     | 3.873  | 8.660     | 410994 |
|          | ANTs B    | 4.951 | 3.782   | 1.581     | 4.301  | 8.544     | 390412 |
|          | ANTs C    | 4.836 | 3.714   | 1.581     | 4.243  | 8.337     | 452552 |
|          | CMTK A    | 4.467 | 4.126   | 1.225     | 3.674  | 7.517     | 417922 |
|          | CMTK B    | 4.306 | 3.549   | 1.414     | 3.808  | 7.280     | 410878 |
|          | CMTK C    | 4.613 | 3.522   | 1.414     | 4.062  | 7.906     | 383418 |
|          | Elastix A | 3.839 | 3.271   | 1.000     | 3.464  | 6.557     | 452338 |
|          | Elastix B | 3.936 | 3.128   | 1.000     | 3.536  | 6.671     | 448592 |
| JFRC2013 | ANTs A    | 5.287 | 4.569   | 1.414     | 4.123  | 10.583    | 368712 |
|          | ANTs B    | 7.394 | 5.886   | 2.000     | 5.523  | 16.016    | 197600 |
|          | ANTs C    | 6.672 | 5.305   | 1.732     | 5.099  | 14.036    | 215962 |
|          | CMTK A    | 4.308 | 3.505   | 1.000     | 3.674  | 7.550     | 425532 |
|          | CMTK B    | 4.414 | 3.515   | 1.225     | 3.808  | 7.746     | 402130 |
|          | CMTK C    | 5.602 | 4.139   | 1.581     | 4.583  | 10.817    | 245386 |
|          | Elastix A | 3.935 | 3.234   | 1.000     | 3.536  | 6.671     | 416116 |
|          | Elastix B | 3.938 | 3.324   | 1.000     | 3.536  | 6.708     | 419422 |
| JRC2018  | ANTs A    | 3.771 | 3.098   | 1.000     | 3.317  | 6.403     | 452490 |
|          | ANTs B    | 5.119 | 4.005   | 1.581     | 4.301  | 9.381     | 385182 |
|          | ANTs C    | 5.495 | 4.301   | 1.581     | 4.528  | 10.247    | 403048 |
|          | CMTK A    | 3.694 | 3.086   | 1.000     | 3.240  | 6.245     | 467804 |
|          | CMTK B    | 3.749 | 3.136   | 1.000     | 3.317  | 6.364     | 458750 |
|          | CMTK C    | 3.860 | 3.118   | 1.000     | 3.536  | 6.519     | 443426 |
|          | Elastix A | 3.770 | 3.107   | 1.000     | 3.464  | 6.364     | 441406 |
|          | Elastix B | 3.861 | 3.516   | 1.000     | 3.464  | 6.481     | 435064 |
| FCWB     | ANTs A    | 4.263 | 3.615   | 1.000     | 3.808  | 7.314     | 460912 |
|          | ANTs B    | 6.585 | 5.218   | 1.732     | 5.099  | 13.675    | 280454 |
|          | ANTs C    | 7.174 | 6.479   | 1.581     | 5.000  | 16.763    | 341950 |
|          | CMTK A    | 4.270 | 3.651   | 1.000     | 3.674  | 7.649     | 463556 |
|          | CMTK B    | 4.281 | 3.740   | 1.000     | 3.808  | 7.550     | 449328 |
|          | CMTK C    | 4.521 | 3.681   | 1.000     | 3.808  | 8.246     | 373002 |
|          | Elastix A | 4.855 | 4.014   | 1.225     | 4.183  | 8.660     | 408028 |
|          | Elastix B | 4.065 | 3.510   | 1.000     | 3.606  | 7.106     | 532386 |
| Tefor    | ANTs A    | 3.862 | 3.146   | 1.000     | 3.536  | 6.557     | 446818 |
|          | ANTs B    | 5.076 | 4.005   | 1.581     | 4.301  | 8.944     | 387362 |
|          | ANTs C    | 5.220 | 4.459   | 1.581     | 4.243  | 9.220     | 421106 |
|          | CMTK A    | 4.090 | 3.315   | 1.000     | 3.606  | 7.106     | 457468 |
|          | CMTK B    | 4.399 | 3.671   | 1.225     | 3.674  | 7.681     | 445144 |
|          | CMTK C    | 5.448 | 5.667   | 1.581     | 4.183  | 8.631     | 389430 |
|          | Elastix A | 3.905 | 3.120   | 1.225     | 3.536  | 6.557     | 424520 |
|          | Elastix B | 4.507 | 3.591   | 1.414     | 3.808  | 7.778     | 394342 |

Table S36. PRW : prow

| Template | Algorithm | Mean  | Std dev | 10th perc | median | 90th perc | N     |
|----------|-----------|-------|---------|-----------|--------|-----------|-------|
| JFRC2010 | ANTs A    | 8.650 | 6.583   | 3.240     | 7.280  | 13.058    | 12776 |
|          | ANTs B    | 6.726 | 3.628   | 2.121     | 6.325  | 11.853    | 5332  |
|          | ANTs C    | 6.919 | 3.736   | 2.236     | 6.442  | 12.124    | 5164  |
|          | CMTK A    | 8.269 | 4.077   | 3.240     | 7.921  | 13.675    | 4902  |
|          | CMTK B    | 8.348 | 4.733   | 2.828     | 7.649  | 15.100    | 5636  |
|          | CMTK C    | 8.120 | 4.036   | 3.082     | 7.649  | 13.802    | 4300  |
|          | Elastix A | 7.205 | 4.097   | 2.121     | 6.671  | 12.683    | 5184  |
|          | Elastix B | 7.425 | 4.349   | 2.000     | 7.106  | 13.019    | 5252  |
| JFRC2013 | ANTs A    | 6.483 | 3.928   | 1.732     | 5.745  | 11.937    | 6140  |
|          | ANTs B    | 7.392 | 3.944   | 2.636     | 6.856  | 13.058    | 5440  |
|          | ANTs C    | 7.707 | 3.666   | 3.082     | 7.280  | 12.865    | 5362  |
|          | CMTK A    | 7.079 | 3.788   | 2.550     | 6.557  | 12.186    | 6426  |
|          | CMTK B    | 7.120 | 4.025   | 2.449     | 6.519  | 12.530    | 6260  |
|          | CMTK C    | 8.871 | 3.816   | 3.606     | 8.888  | 13.675    | 4532  |
|          | Elastix A | 6.524 | 3.889   | 2.121     | 5.831  | 11.726    | 5546  |
|          | Elastix B | 6.757 | 4.029   | 2.121     | 6.083  | 12.104    | 5690  |
| JRC2018  | ANTs A    | 6.542 | 4.016   | 1.732     | 5.745  | 12.104    | 6208  |
|          | ANTs B    | 6.646 | 4.030   | 1.732     | 5.895  | 12.166    | 6202  |
|          | ANTs C    | 6.856 | 4.018   | 2.121     | 6.083  | 12.367    | 6582  |
|          | CMTK A    | 6.834 | 4.189   | 2.121     | 6.083  | 12.245    | 5732  |
|          | CMTK B    | 6.755 | 4.151   | 2.000     | 5.916  | 12.430    | 6162  |
|          | CMTK C    | 6.748 | 4.089   | 2.121     | 6.083  | 12.186    | 5888  |
|          | Elastix A | 6.671 | 4.026   | 2.000     | 6.000  | 12.104    | 5226  |
|          | Elastix B | 7.546 | 4.414   | 2.345     | 6.708  | 13.600    | 5462  |
| FCWB     | ANTs A    | 6.297 | 3.421   | 2.000     | 5.916  | 11.136    | 5590  |
|          | ANTs B    | 8.126 | 4.053   | 2.550     | 8.031  | 13.611    | 3196  |
|          | ANTs C    | 8.335 | 4.082   | 2.915     | 8.124  | 13.946    | 4078  |
|          | CMTK A    | 7.034 | 4.278   | 2.345     | 6.124  | 12.767    | 6136  |
|          | CMTK B    | 6.829 | 4.076   | 2.236     | 6.083  | 12.124    | 5632  |
|          | CMTK C    | 7.609 | 3.586   | 3.000     | 7.550  | 12.349    | 4046  |
|          | Elastix A | 8.167 | 4.621   | 2.646     | 7.550  | 14.526    | 6008  |
|          | Elastix B | 7.350 | 4.343   | 2.236     | 6.442  | 13.601    | 5688  |
| Tefor    | ANTs A    | 6.669 | 4.165   | 1.732     | 5.831  | 12.104    | 6206  |
|          | ANTs B    | 6.988 | 4.027   | 2.000     | 6.442  | 12.081    | 6332  |
|          | ANTs C    | 7.073 | 3.991   | 2.236     | 6.557  | 12.590    | 7242  |
|          | CMTK A    | 7.247 | 3.744   | 2.449     | 7.000  | 12.166    | 7508  |
|          | CMTK B    | 7.146 | 3.944   | 2.550     | 6.557  | 12.410    | 6372  |
|          | CMTK C    | 7.636 | 3.922   | 2.828     | 7.106  | 12.748    | 5630  |
|          | Elastix A | 6.943 | 4.088   | 2.000     | 6.519  | 12.349    | 5154  |
|          | Elastix B | 7.311 | 4.060   | 2.345     | 6.856  | 12.826    | 5682  |

Table S37. GA.R : gall

| Template | Algorithm | Mean  | Std dev | 10th perc | median | 90th perc | N     |
|----------|-----------|-------|---------|-----------|--------|-----------|-------|
| JFRC2010 | ANTs A    | 6.332 | 6.591   | 1.414     | 4.183  | 15.556    | 30288 |
|          | ANTs B    | 4.387 | 2.400   | 1.581     | 4.123  | 7.649     | 26644 |
|          | ANTs C    | 4.460 | 2.496   | 1.581     | 4.183  | 7.778     | 27714 |
|          | CMTK A    | 5.377 | 4.685   | 1.414     | 4.123  | 10.100    | 29566 |
|          | CMTK B    | 5.202 | 4.786   | 1.414     | 4.000  | 9.381     | 32256 |
|          | CMTK C    | 6.248 | 5.083   | 2.000     | 4.950  | 11.958    | 23192 |
|          | Elastix A | 4.103 | 2.433   | 1.225     | 3.808  | 7.382     | 37556 |
|          | Elastix B | 4.014 | 2.260   | 1.225     | 3.808  | 7.106     | 32506 |
| JFRC2013 | ANTs A    | 3.770 | 2.246   | 1.225     | 3.536  | 6.819     | 31780 |
|          | ANTs B    | 4.478 | 2.626   | 1.581     | 4.123  | 7.810     | 20492 |
|          | ANTs C    | 4.489 | 2.555   | 1.581     | 4.123  | 8.016     | 24386 |
|          | CMTK A    | 4.145 | 2.878   | 1.225     | 3.606  | 7.382     | 33056 |
|          | CMTK B    | 4.430 | 2.991   | 1.414     | 3.808  | 8.031     | 31064 |
|          | CMTK C    | 4.468 | 2.792   | 1.581     | 4.062  | 7.550     | 24506 |
|          | Elastix A | 3.665 | 2.178   | 1.000     | 3.317  | 6.557     | 35180 |
|          | Elastix B | 3.831 | 2.174   | 1.225     | 3.606  | 6.708     | 34084 |
| JRC2018  | ANTs A    | 3.791 | 2.250   | 1.000     | 3.536  | 6.964     | 34898 |
|          | ANTs B    | 3.872 | 2.352   | 1.000     | 3.536  | 7.106     | 32926 |
|          | ANTs C    | 4.057 | 2.519   | 1.000     | 3.606  | 7.416     | 32226 |
|          | CMTK A    | 3.733 | 2.176   | 1.225     | 3.464  | 6.671     | 35186 |
|          | CMTK B    | 3.774 | 2.195   | 1.225     | 3.464  | 6.745     | 35516 |
|          | CMTK C    | 3.781 | 2.232   | 1.000     | 3.536  | 6.856     | 35504 |
|          | Elastix A | 3.832 | 2.249   | 1.225     | 3.536  | 6.856     | 36706 |
|          | Elastix B | 3.967 | 2.208   | 1.414     | 3.674  | 6.964     | 34706 |
| FCWB     | ANTs A    | 3.977 | 2.203   | 1.225     | 3.808  | 6.964     | 30514 |
|          | ANTs B    | 4.686 | 2.763   | 1.581     | 4.243  | 8.307     | 18914 |
|          | ANTs C    | 4.556 | 2.921   | 1.225     | 4.062  | 8.544     | 20840 |
|          | CMTK A    | 4.182 | 2.362   | 1.414     | 3.808  | 7.382     | 31992 |
|          | CMTK B    | 4.035 | 2.340   | 1.414     | 3.606  | 7.246     | 31278 |
|          | CMTK C    | 5.682 | 4.936   | 1.581     | 4.359  | 10.536    | 18984 |
|          | Elastix A | 5.871 | 6.539   | 1.581     | 4.472  | 10.794    | 27614 |
|          | Elastix B | 4.667 | 6.330   | 1.225     | 3.606  | 7.382     | 36610 |
| Tefor    | ANTs A    | 3.938 | 2.297   | 1.225     | 3.606  | 7.106     | 31502 |
|          | ANTs B    | 4.125 | 2.447   | 1.225     | 3.808  | 7.517     | 30136 |
|          | ANTs C    | 4.171 | 2.517   | 1.225     | 3.808  | 7.616     | 31770 |
|          | CMTK A    | 4.897 | 3.875   | 1.414     | 3.873  | 9.487     | 33304 |
|          | CMTK B    | 4.968 | 3.794   | 1.414     | 4.062  | 9.747     | 33040 |
|          | CMTK C    | 4.499 | 3.312   | 1.225     | 3.606  | 8.986     | 27266 |
|          | Elastix A | 4.147 | 2.548   | 1.000     | 3.808  | 7.649     | 34694 |
|          | Elastix B | 4.103 | 2.512   | 1.225     | 3.674  | 7.550     | 33598 |

**Table S38.** AME.L : accessory medulla

| Template  | Algorithm | Mean   | Std dev | 10th perc | median | 90th perc | N      |
|-----------|-----------|--------|---------|-----------|--------|-----------|--------|
| JFRC2010  | ANTs A    | 8.731  | 7.644   | 1.732     | 6.083  | 20.100    | 622814 |
|           | ANTs B    | 5.583  | 4.275   | 1.581     | 4.583  | 10.512    | 661486 |
|           | ANTs C    | 5.919  | 4.652   | 1.581     | 4.743  | 11.533    | 681546 |
|           | CMTK A    | 8.658  | 7.349   | 1.732     | 6.124  | 19.736    | 686186 |
|           | CMTK B    | 7.789  | 6.776   | 1.581     | 5.523  | 18.028    | 664092 |
|           | CMTK C    | 7.343  | 5.857   | 1.732     | 5.701  | 15.264    | 772914 |
|           | Elastix A | 5.059  | 3.798   | 1.581     | 4.301  | 9.247     | 609834 |
| Elastix B | 4.918     | 3.891  | 1.581   | 4.123     | 9.000  | 589106    |        |
| JFRC2013  | ANTs A    | 4.978  | 4.250   | 1.414     | 4.000  | 9.434     | 641886 |
|           | ANTs B    | 5.418  | 4.306   | 1.581     | 4.359  | 10.392    | 642512 |
|           | ANTs C    | 5.490  | 4.560   | 1.581     | 4.359  | 10.536    | 632428 |
|           | CMTK A    | 6.465  | 7.065   | 1.581     | 4.472  | 13.304    | 662426 |
|           | CMTK B    | 6.590  | 7.125   | 1.581     | 4.528  | 13.620    | 653836 |
|           | CMTK C    | 5.806  | 4.269   | 1.581     | 4.743  | 11.269    | 670968 |
|           | Elastix A | 4.868  | 3.992   | 1.414     | 4.000  | 9.110     | 629478 |
| Elastix B | 4.810     | 4.067  | 1.414   | 3.873     | 8.905  | 641258    |        |
| JRC2018   | ANTs A    | 4.845  | 4.067   | 1.414     | 3.873  | 9.000     | 634598 |
|           | ANTs B    | 4.940  | 4.083   | 1.414     | 4.062  | 9.192     | 642236 |
|           | ANTs C    | 5.280  | 4.354   | 1.581     | 4.301  | 9.849     | 638966 |
|           | CMTK A    | 4.785  | 4.034   | 1.414     | 3.808  | 8.775     | 627192 |
|           | CMTK B    | 4.766  | 3.958   | 1.414     | 3.873  | 8.746     | 613616 |
|           | CMTK C    | 4.864  | 4.034   | 1.414     | 4.000  | 8.972     | 616346 |
|           | Elastix A | 4.799  | 3.924   | 1.414     | 3.873  | 8.746     | 643384 |
| Elastix B | 5.128     | 4.489  | 1.414   | 4.123     | 9.487  | 641146    |        |
| FCWB      | ANTs A    | 5.162  | 4.383   | 1.414     | 4.123  | 9.874     | 623178 |
|           | ANTs B    | 5.577  | 4.106   | 1.581     | 4.637  | 10.392    | 712332 |
|           | ANTs C    | 5.870  | 4.359   | 1.581     | 4.950  | 10.977    | 704666 |
|           | CMTK A    | 8.595  | 7.030   | 2.000     | 6.364  | 18.974    | 632218 |
|           | CMTK B    | 7.645  | 6.496   | 1.732     | 5.568  | 16.823    | 590680 |
|           | CMTK C    | 7.306  | 6.005   | 2.000     | 5.523  | 15.330    | 701258 |
|           | Elastix A | 10.169 | 8.568   | 2.236     | 7.746  | 20.797    | 836600 |
| Elastix B | 9.163     | 10.367 | 1.732   | 5.701     | 20.616 | 604174    |        |
| Tefor     | ANTs A    | 4.861  | 4.035   | 1.414     | 3.873  | 9.055     | 634782 |
|           | ANTs B    | 5.207  | 4.293   | 1.581     | 4.183  | 9.721     | 610874 |
|           | ANTs C    | 5.611  | 4.759   | 1.581     | 4.472  | 10.724    | 594648 |
|           | CMTK A    | 7.049  | 6.689   | 1.581     | 4.899  | 16.047    | 686944 |
|           | CMTK B    | 7.033  | 6.672   | 1.581     | 4.899  | 16.140    | 677718 |
|           | CMTK C    | 6.696  | 6.132   | 1.581     | 4.950  | 14.300    | 606444 |
|           | Elastix A | 4.887  | 3.901   | 1.414     | 4.062  | 9.055     | 609784 |
| Elastix B | 4.872     | 3.934  | 1.414   | 4.062     | 9.000  | 599672    |        |

Table S39. LO.L : lobula



| Template | Algorithm | Mean   | Std dev | 10th perc | median | 90th perc | N     |
|----------|-----------|--------|---------|-----------|--------|-----------|-------|
| JFRC2010 | ANTs A    | 7.689  | 7.344   | 2.000     | 5.701  | 12.845    | 20148 |
|          | ANTs B    | 5.515  | 3.217   | 1.732     | 5.148  | 9.747     | 10686 |
|          | ANTs C    | 6.080  | 3.447   | 1.732     | 5.745  | 10.700    | 9926  |
|          | CMTK A    | 8.695  | 6.939   | 1.732     | 6.403  | 19.853    | 8478  |
|          | CMTK B    | 8.106  | 6.006   | 2.121     | 6.364  | 17.734    | 9118  |
|          | CMTK C    | 9.887  | 6.314   | 3.606     | 8.031  | 20.287    | 4994  |
|          | Elastix A | 6.345  | 3.739   | 2.121     | 5.788  | 11.023    | 10304 |
|          | Elastix B | 6.434  | 5.257   | 1.414     | 4.796  | 14.521    | 12294 |
| JFRC2013 | ANTs A    | 4.800  | 3.118   | 1.414     | 4.183  | 9.165     | 13144 |
|          | ANTs B    | 5.842  | 3.593   | 1.732     | 5.148  | 10.675    | 14382 |
|          | ANTs C    | 5.230  | 2.962   | 1.732     | 4.743  | 9.110     | 14040 |
|          | CMTK A    | 4.605  | 3.110   | 1.414     | 4.000  | 8.746     | 14896 |
|          | CMTK B    | 4.467  | 3.068   | 1.225     | 3.674  | 8.726     | 16488 |
|          | CMTK C    | 4.619  | 3.180   | 1.414     | 3.873  | 8.660     | 21730 |
|          | Elastix A | 4.863  | 3.062   | 1.581     | 4.359  | 8.860     | 15960 |
|          | Elastix B | 4.817  | 3.138   | 1.414     | 4.301  | 8.860     | 15224 |
| JRC2018  | ANTs A    | 4.877  | 3.062   | 1.414     | 4.301  | 9.192     | 11708 |
|          | ANTs B    | 4.876  | 3.135   | 1.414     | 4.301  | 9.110     | 13174 |
|          | ANTs C    | 5.203  | 3.239   | 1.581     | 4.528  | 9.487     | 11572 |
|          | CMTK A    | 4.662  | 3.097   | 1.414     | 4.062  | 8.803     | 15284 |
|          | CMTK B    | 4.667  | 3.142   | 1.414     | 4.062  | 8.972     | 15040 |
|          | CMTK C    | 4.638  | 3.055   | 1.414     | 4.062  | 8.803     | 15242 |
|          | Elastix A | 4.895  | 3.078   | 1.581     | 4.359  | 8.746     | 14802 |
|          | Elastix B | 4.942  | 3.323   | 1.414     | 4.243  | 9.407     | 15086 |
| FCWB     | ANTs A    | 5.045  | 3.134   | 1.581     | 4.528  | 9.220     | 10884 |
|          | ANTs B    | 6.541  | 4.049   | 1.732     | 5.874  | 12.268    | 9206  |
|          | ANTs C    | 6.165  | 3.632   | 2.000     | 5.745  | 10.462    | 8972  |
|          | CMTK A    | 7.467  | 5.148   | 1.732     | 6.557  | 15.379    | 9084  |
|          | CMTK B    | 7.050  | 5.135   | 1.581     | 5.874  | 14.782    | 11732 |
|          | CMTK C    | 5.562  | 3.968   | 1.414     | 4.472  | 11.151    | 15624 |
|          | Elastix A | 8.932  | 5.869   | 1.732     | 8.170  | 17.270    | 7836  |
|          | Elastix B | 10.732 | 8.484   | 2.121     | 8.631  | 24.052    | 5380  |
| Tefor    | ANTs A    | 4.979  | 3.086   | 1.581     | 4.359  | 9.487     | 11456 |
|          | ANTs B    | 5.660  | 3.355   | 1.732     | 5.148  | 10.075    | 10102 |
|          | ANTs C    | 5.951  | 3.286   | 2.121     | 5.523  | 10.536    | 10986 |
|          | CMTK A    | 7.099  | 6.071   | 1.581     | 5.196  | 15.362    | 11576 |
|          | CMTK B    | 7.159  | 5.585   | 1.581     | 5.568  | 15.524    | 11120 |
|          | CMTK C    | 6.302  | 3.811   | 1.732     | 5.568  | 11.853    | 12474 |
|          | Elastix A | 6.509  | 3.890   | 2.121     | 6.000  | 11.351    | 10114 |
|          | Elastix B | 7.278  | 5.157   | 1.732     | 6.000  | 14.933    | 8990  |

**Table S40.** BU.L : bulb

| Template | Algorithm | Mean  | Std dev | 10th perc | median | 90th perc | N      |
|----------|-----------|-------|---------|-----------|--------|-----------|--------|
| JFRC2010 | ANTs A    | 6.131 | 4.686   | 1.581     | 5.000  | 12.104    | 273626 |
|          | ANTs B    | 5.764 | 4.971   | 1.414     | 4.528  | 11.402    | 271974 |
|          | ANTs C    | 6.337 | 5.179   | 1.581     | 5.000  | 12.430    | 282188 |
|          | CMTK A    | 6.438 | 4.694   | 1.581     | 5.339  | 12.826    | 438598 |
|          | CMTK B    | 6.349 | 4.623   | 1.581     | 5.196  | 12.530    | 401034 |
|          | CMTK C    | 7.004 | 4.965   | 1.732     | 5.788  | 13.946    | 397448 |
|          | Elastix A | 4.973 | 3.639   | 1.414     | 4.183  | 9.327     | 269426 |
|          | Elastix B | 5.390 | 3.897   | 1.581     | 4.528  | 10.271    | 277598 |
| JFRC2013 | ANTs A    | 4.914 | 3.565   | 1.225     | 4.183  | 9.327     | 305420 |
|          | ANTs B    | 6.759 | 5.441   | 1.732     | 5.431  | 13.077    | 268188 |
|          | ANTs C    | 6.399 | 5.541   | 1.581     | 5.000  | 12.530    | 295292 |
|          | CMTK A    | 5.221 | 3.812   | 1.414     | 4.359  | 10.124    | 329340 |
|          | CMTK B    | 5.047 | 3.592   | 1.414     | 4.243  | 9.670     | 321452 |
|          | CMTK C    | 5.661 | 4.459   | 1.225     | 4.528  | 11.511    | 344122 |
|          | Elastix A | 4.969 | 3.514   | 1.414     | 4.183  | 9.460     | 272544 |
|          | Elastix B | 4.888 | 3.525   | 1.414     | 4.123  | 9.220     | 295686 |
| JRC2018  | ANTs A    | 4.787 | 3.415   | 1.225     | 4.123  | 9.028     | 320566 |
|          | ANTs B    | 5.584 | 4.404   | 1.414     | 4.528  | 10.794    | 297424 |
|          | ANTs C    | 5.671 | 4.244   | 1.581     | 4.690  | 11.068    | 326468 |
|          | CMTK A    | 4.845 | 3.348   | 1.414     | 4.183  | 9.000     | 322432 |
|          | CMTK B    | 4.854 | 3.356   | 1.414     | 4.183  | 9.028     | 309956 |
|          | CMTK C    | 5.107 | 3.580   | 1.414     | 4.359  | 9.618     | 297512 |
|          | Elastix A | 4.932 | 3.403   | 1.414     | 4.243  | 9.220     | 286506 |
|          | Elastix B | 5.025 | 3.441   | 1.414     | 4.359  | 9.301     | 300684 |
| FCWB     | ANTs A    | 5.304 | 3.605   | 1.414     | 4.583  | 10.050    | 333478 |
|          | ANTs B    | 6.691 | 5.234   | 1.732     | 5.431  | 12.590    | 251700 |
|          | ANTs C    | 6.766 | 5.062   | 1.732     | 5.568  | 13.229    | 280818 |
|          | CMTK A    | 6.283 | 5.506   | 1.581     | 5.000  | 11.489    | 283790 |
|          | CMTK B    | 5.714 | 4.789   | 1.581     | 4.743  | 10.223    | 292828 |
|          | CMTK C    | 6.162 | 4.331   | 1.732     | 5.196  | 11.619    | 272040 |
|          | Elastix A | 7.355 | 5.445   | 1.732     | 6.000  | 14.933    | 240540 |
|          | Elastix B | 6.728 | 6.016   | 1.581     | 5.148  | 13.210    | 300976 |
| Tefor    | ANTs A    | 4.792 | 3.468   | 1.225     | 4.123  | 9.028     | 318946 |
|          | ANTs B    | 5.730 | 4.661   | 1.414     | 4.583  | 11.091    | 292186 |
|          | ANTs C    | 6.158 | 5.294   | 1.581     | 4.796  | 11.853    | 323302 |
|          | CMTK A    | 7.814 | 9.068   | 1.414     | 4.690  | 19.812    | 270274 |
|          | CMTK B    | 8.033 | 9.262   | 1.414     | 4.743  | 21.083    | 266200 |
|          | CMTK C    | 6.962 | 7.775   | 1.414     | 4.743  | 13.675    | 283214 |
|          | Elastix A | 4.958 | 3.537   | 1.414     | 4.183  | 9.327     | 291076 |
|          | Elastix B | 5.504 | 3.924   | 1.581     | 4.690  | 10.512    | 291692 |

**Table S41.** L.H.L : lateral horn

| Template | Algorithm | Mean   | Std dev | 10th perc | median | 90th perc | N      |
|----------|-----------|--------|---------|-----------|--------|-----------|--------|
| JFRC2010 | ANTs A    | 10.240 | 6.320   | 2.345     | 9.721  | 19.118    | 121430 |
|          | ANTs B    | 5.447  | 4.414   | 1.581     | 4.301  | 10.909    | 73844  |
|          | ANTs C    | 5.306  | 3.819   | 1.581     | 4.472  | 10.247    | 74074  |
|          | CMTK A    | 8.578  | 5.994   | 2.121     | 7.000  | 17.464    | 100410 |
|          | CMTK B    | 8.907  | 5.981   | 2.236     | 7.616  | 17.521    | 86462  |
|          | CMTK C    | 7.021  | 5.576   | 1.581     | 5.148  | 15.313    | 135452 |
|          | Elastix A | 5.717  | 5.143   | 1.581     | 4.183  | 12.288    | 55186  |
|          | Elastix B | 5.670  | 4.622   | 1.581     | 4.359  | 11.937    | 63698  |
| JFRC2013 | ANTs A    | 5.205  | 5.115   | 1.000     | 3.606  | 11.705    | 54360  |
|          | ANTs B    | 7.383  | 4.926   | 2.121     | 6.205  | 14.577    | 91644  |
|          | ANTs C    | 6.899  | 4.498   | 2.000     | 5.874  | 13.342    | 72940  |
|          | CMTK A    | 6.475  | 5.635   | 1.581     | 4.583  | 14.577    | 43294  |
|          | CMTK B    | 7.081  | 5.565   | 1.581     | 5.431  | 14.883    | 47452  |
|          | CMTK C    | 5.981  | 4.454   | 1.581     | 4.796  | 12.207    | 89800  |
|          | Elastix A | 5.019  | 4.734   | 1.225     | 3.606  | 10.392    | 63628  |
|          | Elastix B | 4.886  | 4.696   | 1.225     | 3.536  | 10.025    | 63058  |
| JRC2018  | ANTs A    | 5.203  | 5.151   | 1.000     | 3.606  | 11.853    | 53098  |
|          | ANTs B    | 5.453  | 4.800   | 1.414     | 4.123  | 11.533    | 56144  |
|          | ANTs C    | 5.274  | 4.182   | 1.581     | 4.243  | 9.892     | 71594  |
|          | CMTK A    | 5.436  | 5.279   | 1.225     | 3.808  | 12.369    | 39660  |
|          | CMTK B    | 5.468  | 5.254   | 1.225     | 3.873  | 12.186    | 39286  |
|          | CMTK C    | 5.667  | 5.387   | 1.225     | 4.062  | 12.530    | 37522  |
|          | Elastix A | 5.682  | 5.225   | 1.414     | 4.123  | 12.669    | 44346  |
|          | Elastix B | 5.567  | 4.978   | 1.414     | 4.123  | 12.042    | 45054  |
| FCWB     | ANTs A    | 6.462  | 4.882   | 1.581     | 5.148  | 13.509    | 51556  |
|          | ANTs B    | 6.121  | 4.137   | 1.581     | 5.148  | 12.021    | 120738 |
|          | ANTs C    | 6.829  | 4.370   | 2.121     | 5.916  | 12.923    | 100878 |
|          | CMTK A    | 10.556 | 6.073   | 3.240     | 9.747  | 19.092    | 112532 |
|          | CMTK B    | 9.697  | 6.011   | 2.646     | 8.718  | 17.958    | 53776  |
|          | CMTK C    | 7.610  | 5.184   | 2.121     | 6.364  | 15.199    | 65444  |
|          | Elastix A | 9.033  | 6.060   | 2.236     | 7.616  | 18.111    | 199898 |
|          | Elastix B | 10.309 | 6.318   | 2.828     | 9.301  | 19.609    | 100424 |
| Tefor    | ANTs A    | 5.186  | 5.031   | 1.225     | 3.606  | 11.576    | 52200  |
|          | ANTs B    | 6.187  | 4.873   | 1.581     | 4.743  | 13.058    | 46310  |
|          | ANTs C    | 7.951  | 5.609   | 2.000     | 6.442  | 16.186    | 60762  |
|          | CMTK A    | 9.464  | 6.190   | 2.121     | 8.544  | 18.000    | 67854  |
|          | CMTK B    | 9.415  | 6.090   | 2.236     | 8.337  | 18.184    | 69588  |
|          | CMTK C    | 11.129 | 6.969   | 2.915     | 10.000 | 21.190    | 60618  |
|          | Elastix A | 6.152  | 5.289   | 1.581     | 4.528  | 13.583    | 49102  |
|          | Elastix B | 8.314  | 6.203   | 2.000     | 6.364  | 17.621    | 103728 |

**Table S42.** LAL.L : lateral accessory lobe

| Template | Algorithm | Mean  | Std dev | 10th perc | median | 90th perc | N     |
|----------|-----------|-------|---------|-----------|--------|-----------|-------|
| JFRC2010 | ANTs A    | 9.178 | 8.034   | 1.732     | 6.519  | 22.471    | 19372 |
|          | ANTs B    | 4.415 | 2.860   | 1.225     | 3.873  | 8.276     | 29064 |
|          | ANTs C    | 4.149 | 3.045   | 1.000     | 3.464  | 8.307     | 47732 |
|          | CMTK A    | 6.167 | 4.918   | 1.414     | 4.950  | 12.767    | 55044 |
|          | CMTK B    | 5.427 | 3.647   | 1.414     | 4.690  | 10.440    | 48774 |
|          | CMTK C    | 5.454 | 3.460   | 1.581     | 4.975  | 9.823     | 40106 |
|          | Elastix A | 4.994 | 2.999   | 1.581     | 4.528  | 8.972     | 16106 |
|          | Elastix B | 4.680 | 2.960   | 1.414     | 4.243  | 8.544     | 22274 |
| JFRC2013 | ANTs A    | 4.549 | 3.076   | 1.225     | 3.873  | 8.631     | 23450 |
|          | ANTs B    | 3.661 | 2.605   | 1.000     | 3.082  | 7.071     | 43696 |
|          | ANTs C    | 3.624 | 2.660   | 1.000     | 3.000  | 7.280     | 42390 |
|          | CMTK A    | 4.543 | 3.047   | 1.414     | 3.873  | 8.738     | 24904 |
|          | CMTK B    | 4.474 | 3.080   | 1.225     | 3.808  | 8.573     | 25474 |
|          | CMTK C    | 4.436 | 2.772   | 1.414     | 3.873  | 8.062     | 40470 |
|          | Elastix A | 4.353 | 3.057   | 1.000     | 3.674  | 8.515     | 26294 |
|          | Elastix B | 4.620 | 3.131   | 1.225     | 4.000  | 8.775     | 24252 |
| JRC2018  | ANTs A    | 4.378 | 3.041   | 1.225     | 3.674  | 8.485     | 24512 |
|          | ANTs B    | 4.506 | 3.037   | 1.225     | 3.808  | 8.515     | 24614 |
|          | ANTs C    | 4.316 | 2.850   | 1.000     | 3.808  | 8.093     | 28654 |
|          | CMTK A    | 4.710 | 3.125   | 1.414     | 4.062  | 8.888     | 26174 |
|          | CMTK B    | 4.584 | 3.055   | 1.225     | 3.873  | 8.746     | 25826 |
|          | CMTK C    | 4.543 | 3.108   | 1.225     | 3.808  | 8.746     | 25846 |
|          | Elastix A | 4.491 | 3.149   | 1.225     | 3.808  | 8.631     | 24382 |
|          | Elastix B | 4.691 | 3.151   | 1.414     | 4.062  | 8.746     | 24012 |
| FCWB     | ANTs A    | 4.290 | 2.902   | 1.225     | 3.606  | 8.185     | 24878 |
|          | ANTs B    | 4.211 | 3.012   | 1.000     | 3.536  | 8.185     | 27174 |
|          | ANTs C    | 3.897 | 2.760   | 1.000     | 3.317  | 7.382     | 28356 |
|          | CMTK A    | 4.296 | 2.864   | 1.000     | 3.808  | 8.062     | 73796 |
|          | CMTK B    | 4.522 | 3.127   | 1.225     | 3.873  | 8.367     | 39270 |
|          | CMTK C    | 4.203 | 2.886   | 1.000     | 3.606  | 8.093     | 45984 |
|          | Elastix A | 4.496 | 3.587   | 1.225     | 3.808  | 8.062     | 47902 |
|          | Elastix B | 4.921 | 3.166   | 1.414     | 4.301  | 9.407     | 50172 |
| Tefor    | ANTs A    | 4.597 | 3.061   | 1.414     | 3.873  | 8.660     | 23362 |
|          | ANTs B    | 4.360 | 2.945   | 1.414     | 3.674  | 8.276     | 22966 |
|          | ANTs C    | 4.423 | 2.995   | 1.000     | 3.808  | 8.426     | 34566 |
|          | CMTK A    | 4.499 | 2.806   | 1.414     | 4.062  | 8.155     | 30862 |
|          | CMTK B    | 4.396 | 2.804   | 1.414     | 3.873  | 8.093     | 30122 |
|          | CMTK C    | 5.168 | 3.147   | 1.581     | 4.743  | 9.513     | 20416 |
|          | Elastix A | 4.475 | 2.692   | 1.414     | 4.123  | 8.031     | 16314 |
|          | Elastix B | 4.425 | 2.658   | 1.414     | 4.062  | 7.906     | 27170 |

**Table S43.** CAN.L : cante

| Template | Algorithm | Mean  | Std dev | 10th perc | median | 90th perc | N      |
|----------|-----------|-------|---------|-----------|--------|-----------|--------|
| JFRC2010 | ANTs A    | 5.702 | 5.274   | 1.581     | 4.472  | 10.817    | 199226 |
|          | ANTs B    | 5.715 | 6.225   | 1.581     | 4.301  | 9.618     | 165386 |
|          | ANTs C    | 5.753 | 5.989   | 1.581     | 4.528  | 9.618     | 187140 |
|          | CMTK A    | 5.132 | 5.145   | 1.414     | 4.062  | 8.803     | 218338 |
|          | CMTK B    | 4.996 | 4.845   | 1.414     | 4.062  | 8.631     | 218734 |
|          | CMTK C    | 5.457 | 5.774   | 1.581     | 4.183  | 9.407     | 200846 |
|          | Elastix A | 4.937 | 5.199   | 1.225     | 3.808  | 8.426     | 189012 |
|          | Elastix B | 4.852 | 4.941   | 1.225     | 3.808  | 8.246     | 200538 |
| JFRC2013 | ANTs A    | 4.993 | 5.454   | 1.225     | 3.808  | 8.602     | 178108 |
|          | ANTs B    | 6.124 | 6.457   | 1.581     | 4.528  | 10.607    | 144664 |
|          | ANTs C    | 5.968 | 6.282   | 1.581     | 4.359  | 10.440    | 150050 |
|          | CMTK A    | 5.528 | 5.617   | 1.581     | 4.243  | 9.644     | 173606 |
|          | CMTK B    | 5.683 | 5.882   | 1.581     | 4.359  | 9.950     | 164712 |
|          | CMTK C    | 6.089 | 5.811   | 1.581     | 4.637  | 10.770    | 145314 |
|          | Elastix A | 4.909 | 5.689   | 1.225     | 3.606  | 8.276     | 192508 |
|          | Elastix B | 4.845 | 5.514   | 1.225     | 3.606  | 8.185     | 198670 |
| JRC2018  | ANTs A    | 4.730 | 5.167   | 1.000     | 3.674  | 7.937     | 197440 |
|          | ANTs B    | 5.373 | 5.741   | 1.414     | 4.123  | 9.301     | 181890 |
|          | ANTs C    | 5.681 | 5.736   | 1.581     | 4.359  | 10.050    | 192824 |
|          | CMTK A    | 4.842 | 5.356   | 1.000     | 3.674  | 8.185     | 197642 |
|          | CMTK B    | 4.868 | 5.361   | 1.000     | 3.674  | 8.307     | 194334 |
|          | CMTK C    | 4.977 | 5.309   | 1.225     | 3.808  | 8.515     | 193026 |
|          | Elastix A | 4.875 | 5.211   | 1.225     | 3.808  | 8.185     | 195568 |
|          | Elastix B | 5.161 | 5.565   | 1.225     | 3.873  | 8.860     | 197934 |
| FCWB     | ANTs A    | 5.020 | 5.213   | 1.225     | 3.808  | 8.746     | 191558 |
|          | ANTs B    | 5.986 | 6.269   | 1.581     | 4.528  | 10.607    | 145952 |
|          | ANTs C    | 6.040 | 6.381   | 1.581     | 4.528  | 10.607    | 155918 |
|          | CMTK A    | 5.365 | 4.788   | 1.581     | 4.359  | 9.247     | 192852 |
|          | CMTK B    | 5.442 | 4.986   | 1.581     | 4.359  | 9.434     | 193322 |
|          | CMTK C    | 5.592 | 5.494   | 1.581     | 4.243  | 9.950     | 173954 |
|          | Elastix A | 6.366 | 7.889   | 1.581     | 4.583  | 10.607    | 194944 |
|          | Elastix B | 5.446 | 6.128   | 1.414     | 4.123  | 9.301     | 198834 |
| Tefor    | ANTs A    | 4.738 | 5.086   | 1.225     | 3.674  | 7.937     | 199464 |
|          | ANTs B    | 5.561 | 6.031   | 1.581     | 4.183  | 9.434     | 174346 |
|          | ANTs C    | 5.980 | 6.428   | 1.581     | 4.472  | 10.512    | 183560 |
|          | CMTK A    | 5.149 | 5.134   | 1.225     | 4.000  | 9.434     | 218888 |
|          | CMTK B    | 5.087 | 5.109   | 1.225     | 4.062  | 9.000     | 219208 |
|          | CMTK C    | 5.239 | 5.104   | 1.581     | 4.183  | 8.972     | 207136 |
|          | Elastix A | 4.970 | 5.408   | 1.225     | 3.808  | 8.515     | 197682 |
|          | Elastix B | 4.964 | 4.944   | 1.414     | 4.062  | 8.337     | 210416 |

**Table S44.** AMMC.L : antennal mechanosensory and motor center

| Template | Algorithm | Mean  | Std dev | 10th perc | median | 90th perc | N      |
|----------|-----------|-------|---------|-----------|--------|-----------|--------|
| JFRC2010 | ANTs A    | 4.630 | 5.270   | 0.707     | 3.000  | 9.874     | 320720 |
|          | ANTs B    | 3.816 | 3.557   | 0.707     | 2.646  | 8.573     | 258504 |
|          | ANTs C    | 4.282 | 3.797   | 0.707     | 3.162  | 9.460     | 250196 |
|          | CMTK A    | 5.171 | 6.012   | 0.707     | 2.646  | 14.577    | 265902 |
|          | CMTK B    | 4.996 | 5.497   | 0.707     | 2.828  | 13.134    | 270070 |
|          | CMTK C    | 5.192 | 5.249   | 0.707     | 3.240  | 12.610    | 266652 |
|          | Elastix A | 3.301 | 2.947   | 0.707     | 2.345  | 7.314     | 263970 |
|          | Elastix B | 3.519 | 3.570   | 0.707     | 2.236  | 8.185     | 271836 |
| JFRC2013 | ANTs A    | 2.964 | 2.740   | 0.707     | 2.121  | 6.519     | 274140 |
|          | ANTs B    | 3.956 | 3.560   | 0.707     | 2.915  | 8.775     | 273296 |
|          | ANTs C    | 3.621 | 3.400   | 0.707     | 2.550  | 8.093     | 272964 |
|          | CMTK A    | 3.401 | 3.014   | 0.707     | 2.550  | 7.211     | 251372 |
|          | CMTK B    | 3.548 | 3.139   | 0.707     | 2.646  | 7.517     | 250490 |
|          | CMTK C    | 4.381 | 3.392   | 1.000     | 3.536  | 9.000     | 252590 |
|          | Elastix A | 3.141 | 2.831   | 0.707     | 2.236  | 6.856     | 269952 |
|          | Elastix B | 3.077 | 2.832   | 0.707     | 2.236  | 6.708     | 274714 |
| JRC2018  | ANTs A    | 2.936 | 2.696   | 0.707     | 2.121  | 6.442     | 277906 |
|          | ANTs B    | 3.112 | 2.860   | 0.707     | 2.236  | 6.856     | 275250 |
|          | ANTs C    | 3.129 | 2.864   | 0.707     | 2.236  | 6.856     | 270738 |
|          | CMTK A    | 2.915 | 2.794   | 0.707     | 2.121  | 6.442     | 247334 |
|          | CMTK B    | 2.904 | 2.782   | 0.707     | 2.121  | 6.364     | 250582 |
|          | CMTK C    | 2.940 | 2.756   | 0.707     | 2.121  | 6.442     | 256194 |
|          | Elastix A | 3.018 | 2.764   | 0.707     | 2.121  | 6.557     | 270890 |
|          | Elastix B | 3.035 | 2.836   | 0.707     | 2.121  | 6.671     | 271324 |
| FCWB     | ANTs A    | 3.200 | 2.942   | 0.707     | 2.236  | 7.106     | 285442 |
|          | ANTs B    | 3.882 | 3.600   | 0.707     | 2.646  | 8.660     | 266108 |
|          | ANTs C    | 3.829 | 3.367   | 0.707     | 2.828  | 8.573     | 261238 |
|          | CMTK A    | 5.664 | 5.290   | 1.000     | 3.808  | 12.923    | 244344 |
|          | CMTK B    | 5.217 | 5.143   | 1.000     | 3.606  | 11.424    | 228770 |
|          | CMTK C    | 4.132 | 4.121   | 0.707     | 2.646  | 9.670     | 249120 |
|          | Elastix A | 7.432 | 6.613   | 1.000     | 5.292  | 17.132    | 243274 |
|          | Elastix B | 4.629 | 4.765   | 0.707     | 2.915  | 10.998    | 273922 |
| Tefor    | ANTs A    | 2.932 | 2.682   | 0.707     | 2.121  | 6.364     | 274682 |
|          | ANTs B    | 3.530 | 3.179   | 0.707     | 2.550  | 7.810     | 263076 |
|          | ANTs C    | 3.692 | 3.349   | 0.707     | 2.646  | 8.276     | 259718 |
|          | CMTK A    | 4.028 | 4.995   | 0.707     | 2.236  | 9.721     | 250548 |
|          | CMTK B    | 4.129 | 5.001   | 0.707     | 2.236  | 10.392    | 254716 |
|          | CMTK C    | 3.852 | 3.775   | 0.707     | 2.646  | 8.631     | 251828 |
|          | Elastix A | 3.176 | 2.807   | 0.707     | 2.236  | 6.856     | 270686 |
|          | Elastix B | 3.731 | 3.463   | 0.707     | 2.646  | 8.276     | 266274 |

**Table S45.** ICL.L : inferior clamp

| Template | Algorithm | Mean  | Std dev | 10th perc | median | 90th perc | N     |
|----------|-----------|-------|---------|-----------|--------|-----------|-------|
| JFRC2010 | ANTs A    | 6.841 | 6.256   | 1.581     | 5.099  | 13.379    | 22424 |
|          | ANTs B    | 4.086 | 2.934   | 1.000     | 3.240  | 8.307     | 11390 |
|          | ANTs C    | 4.507 | 3.029   | 1.225     | 3.808  | 8.944     | 10434 |
|          | CMTK A    | 6.861 | 6.411   | 0.707     | 4.637  | 17.117    | 8222  |
|          | CMTK B    | 7.242 | 7.921   | 1.000     | 4.743  | 17.641    | 7780  |
|          | CMTK C    | 8.124 | 5.609   | 2.449     | 7.000  | 16.509    | 5620  |
|          | Elastix A | 4.611 | 3.085   | 1.000     | 4.062  | 9.110     | 8760  |
|          | Elastix B | 5.793 | 5.397   | 0.707     | 3.808  | 13.675    | 10622 |
| JFRC2013 | ANTs A    | 3.843 | 2.835   | 1.000     | 3.000  | 7.937     | 11872 |
|          | ANTs B    | 5.089 | 3.287   | 1.225     | 4.528  | 9.670     | 8524  |
|          | ANTs C    | 4.723 | 3.322   | 1.000     | 3.873  | 9.618     | 9558  |
|          | CMTK A    | 3.947 | 2.867   | 1.000     | 3.240  | 7.906     | 13272 |
|          | CMTK B    | 4.215 | 2.919   | 1.000     | 3.606  | 8.276     | 13264 |
|          | CMTK C    | 4.151 | 2.845   | 1.000     | 3.536  | 8.093     | 14454 |
|          | Elastix A | 4.034 | 2.971   | 1.000     | 3.162  | 8.544     | 11234 |
|          | Elastix B | 4.181 | 2.877   | 1.000     | 3.606  | 8.276     | 11774 |
| JRC2018  | ANTs A    | 3.780 | 2.795   | 1.000     | 3.000  | 7.778     | 11756 |
|          | ANTs B    | 3.733 | 2.846   | 0.707     | 2.915  | 7.906     | 11878 |
|          | ANTs C    | 3.867 | 2.873   | 1.000     | 3.000  | 8.093     | 10400 |
|          | CMTK A    | 3.581 | 2.687   | 0.707     | 2.915  | 7.246     | 13240 |
|          | CMTK B    | 3.521 | 2.683   | 0.707     | 2.828  | 7.382     | 13728 |
|          | CMTK C    | 3.545 | 2.768   | 0.707     | 2.646  | 7.649     | 13292 |
|          | Elastix A | 3.646 | 2.756   | 1.000     | 2.915  | 7.681     | 12872 |
|          | Elastix B | 3.947 | 2.887   | 0.707     | 3.240  | 8.124     | 12502 |
| FCWB     | ANTs A    | 3.985 | 2.916   | 1.000     | 3.162  | 8.093     | 11384 |
|          | ANTs B    | 5.016 | 3.673   | 1.000     | 4.243  | 10.149    | 6992  |
|          | ANTs C    | 4.931 | 3.364   | 1.000     | 4.243  | 9.849     | 7812  |
|          | CMTK A    | 4.931 | 4.047   | 1.000     | 3.606  | 10.886    | 10626 |
|          | CMTK B    | 5.382 | 4.323   | 1.000     | 4.183  | 11.726    | 12736 |
|          | CMTK C    | 4.243 | 3.157   | 1.000     | 3.464  | 8.944     | 12936 |
|          | Elastix A | 6.866 | 5.075   | 1.225     | 5.745  | 14.089    | 9312  |
|          | Elastix B | 7.656 | 6.481   | 1.732     | 6.042  | 15.925    | 7320  |
| Tefor    | ANTs A    | 3.797 | 2.739   | 1.000     | 3.000  | 7.810     | 12254 |
|          | ANTs B    | 4.168 | 2.814   | 1.000     | 3.536  | 8.246     | 10092 |
|          | ANTs C    | 4.115 | 2.670   | 1.000     | 3.536  | 8.093     | 12988 |
|          | CMTK A    | 5.519 | 5.626   | 0.707     | 4.031  | 10.886    | 12094 |
|          | CMTK B    | 5.515 | 5.538   | 0.707     | 3.808  | 11.023    | 11236 |
|          | CMTK C    | 4.592 | 2.858   | 1.414     | 4.062  | 8.860     | 14446 |
|          | Elastix A | 4.895 | 3.334   | 1.000     | 4.243  | 9.513     | 9732  |
|          | Elastix B | 6.338 | 5.427   | 1.000     | 4.528  | 14.560    | 8606  |

**Table S46.** BU\_R : bulb

| Template | Algorithm | Mean  | Std dev | 10th perc | median | 90th perc | N      |
|----------|-----------|-------|---------|-----------|--------|-----------|--------|
| JFRC2010 | ANTs A    | 8.553 | 6.912   | 1.581     | 6.364  | 18.722    | 127354 |
|          | ANTs B    | 4.516 | 3.277   | 1.225     | 3.674  | 8.888     | 247654 |
|          | ANTs C    | 4.862 | 3.569   | 1.225     | 4.062  | 9.747     | 276772 |
|          | CMTK A    | 6.364 | 5.110   | 1.414     | 4.950  | 13.656    | 181760 |
|          | CMTK B    | 6.464 | 5.207   | 1.414     | 4.950  | 14.160    | 161820 |
|          | CMTK C    | 5.854 | 4.722   | 1.414     | 4.528  | 12.227    | 258396 |
|          | Elastix A | 4.170 | 3.497   | 1.000     | 3.240  | 8.246     | 127674 |
|          | Elastix B | 4.304 | 3.391   | 1.000     | 3.464  | 8.544     | 117868 |
| JFRC2013 | ANTs A    | 4.252 | 3.412   | 1.000     | 3.464  | 8.426     | 115754 |
|          | ANTs B    | 4.414 | 3.302   | 1.225     | 3.606  | 8.631     | 279706 |
|          | ANTs C    | 4.619 | 3.383   | 1.225     | 3.808  | 9.192     | 254522 |
|          | CMTK A    | 4.824 | 3.874   | 1.000     | 3.808  | 9.849     | 104886 |
|          | CMTK B    | 4.860 | 3.763   | 1.225     | 3.808  | 9.849     | 109968 |
|          | CMTK C    | 4.822 | 3.441   | 1.414     | 4.062  | 9.434     | 194618 |
|          | Elastix A | 4.441 | 3.515   | 1.000     | 3.606  | 8.631     | 107718 |
|          | Elastix B | 4.440 | 3.540   | 1.000     | 3.606  | 8.775     | 106336 |
| JRC2018  | ANTs A    | 4.268 | 3.460   | 1.000     | 3.464  | 8.544     | 114502 |
|          | ANTs B    | 4.623 | 3.490   | 1.225     | 3.808  | 9.083     | 141690 |
|          | ANTs C    | 4.590 | 3.383   | 1.225     | 3.808  | 9.192     | 145422 |
|          | CMTK A    | 4.504 | 3.553   | 1.000     | 3.606  | 9.000     | 106820 |
|          | CMTK B    | 4.472 | 3.555   | 1.000     | 3.606  | 8.944     | 101196 |
|          | CMTK C    | 4.553 | 3.671   | 1.000     | 3.606  | 8.972     | 103616 |
|          | Elastix A | 4.296 | 3.409   | 1.000     | 3.536  | 8.337     | 113174 |
|          | Elastix B | 4.257 | 3.389   | 1.000     | 3.464  | 8.396     | 112718 |
| FCWB     | ANTs A    | 4.399 | 3.629   | 1.000     | 3.464  | 8.860     | 116374 |
|          | ANTs B    | 4.546 | 3.278   | 1.414     | 3.808  | 8.631     | 230142 |
|          | ANTs C    | 4.721 | 3.336   | 1.414     | 4.062  | 8.972     | 212550 |
|          | CMTK A    | 7.129 | 5.518   | 1.581     | 5.701  | 15.067    | 201758 |
|          | CMTK B    | 7.042 | 5.441   | 1.581     | 5.568  | 14.866    | 151708 |
|          | CMTK C    | 6.447 | 5.039   | 1.581     | 5.000  | 13.675    | 164182 |
|          | Elastix A | 6.541 | 5.142   | 1.581     | 5.148  | 13.472    | 263744 |
|          | Elastix B | 7.034 | 5.573   | 1.581     | 5.523  | 14.731    | 178076 |
| Tefor    | ANTs A    | 4.269 | 3.440   | 1.000     | 3.464  | 8.485     | 120644 |
|          | ANTs B    | 4.489 | 3.298   | 1.225     | 3.674  | 8.803     | 210210 |
|          | ANTs C    | 5.060 | 3.693   | 1.414     | 4.123  | 10.075    | 177482 |
|          | CMTK A    | 7.087 | 5.766   | 1.414     | 5.339  | 15.906    | 165070 |
|          | CMTK B    | 7.404 | 6.048   | 1.581     | 5.523  | 16.643    | 161920 |
|          | CMTK C    | 6.849 | 5.351   | 1.581     | 5.292  | 14.731    | 164558 |
|          | Elastix A | 4.036 | 3.284   | 1.000     | 3.240  | 7.906     | 161986 |
|          | Elastix B | 4.821 | 3.675   | 1.225     | 3.873  | 9.618     | 185564 |

**Table S47.** VES.L : vest



| Template  | Algorithm | Mean  | Std dev | 10th perc | median | 90th perc | N      |
|-----------|-----------|-------|---------|-----------|--------|-----------|--------|
| JFRC2010  | ANTs A    | 4.882 | 4.210   | 1.000     | 3.606  | 10.583    | 232736 |
|           | ANTs B    | 4.080 | 3.540   | 0.707     | 3.000  | 8.718     | 256620 |
|           | ANTs C    | 4.103 | 3.172   | 1.000     | 3.240  | 8.544     | 390228 |
|           | CMTK A    | 4.728 | 4.691   | 0.707     | 3.162  | 10.583    | 242754 |
|           | CMTK B    | 4.884 | 5.420   | 0.707     | 3.082  | 11.269    | 254096 |
|           | CMTK C    | 4.620 | 4.982   | 1.000     | 3.000  | 10.512    | 338184 |
|           | Elastix A | 2.999 | 2.482   | 0.707     | 2.345  | 5.874     | 255814 |
| Elastix B | 3.499     | 2.962 | 0.707   | 2.646     | 7.280  | 213680    |        |
| JFRC2013  | ANTs A    | 3.054 | 2.715   | 0.707     | 2.236  | 6.442     | 223036 |
|           | ANTs B    | 4.110 | 3.312   | 1.000     | 3.240  | 8.396     | 358766 |
|           | ANTs C    | 4.159 | 3.331   | 1.000     | 3.240  | 8.944     | 370482 |
|           | CMTK A    | 3.197 | 2.739   | 0.707     | 2.550  | 6.442     | 190126 |
|           | CMTK B    | 3.244 | 2.740   | 0.707     | 2.550  | 6.557     | 188414 |
|           | CMTK C    | 4.745 | 3.770   | 1.000     | 3.606  | 10.440    | 230108 |
|           | Elastix A | 2.953 | 2.545   | 0.707     | 2.236  | 5.831     | 229984 |
| Elastix B | 3.015     | 2.666 | 0.707   | 2.236     | 6.083  | 204902    |        |
| JRC2018   | ANTs A    | 2.930 | 2.662   | 0.707     | 2.236  | 6.042     | 223680 |
|           | ANTs B    | 3.316 | 3.020   | 0.707     | 2.345  | 7.211     | 224980 |
|           | ANTs C    | 3.240 | 2.907   | 0.707     | 2.345  | 7.036     | 228840 |
|           | CMTK A    | 3.193 | 2.959   | 0.707     | 2.345  | 6.708     | 195902 |
|           | CMTK B    | 3.107 | 2.839   | 0.707     | 2.236  | 6.557     | 190138 |
|           | CMTK C    | 3.035 | 2.702   | 0.707     | 2.236  | 6.364     | 197050 |
|           | Elastix A | 3.059 | 2.679   | 0.707     | 2.345  | 6.205     | 206600 |
| Elastix B | 2.988     | 2.646 | 0.707   | 2.236     | 6.083  | 201614    |        |
| FCWB      | ANTs A    | 3.394 | 3.016   | 0.707     | 2.550  | 7.280     | 226180 |
|           | ANTs B    | 4.588 | 3.574   | 1.000     | 3.606  | 9.618     | 298536 |
|           | ANTs C    | 3.784 | 2.918   | 1.000     | 3.000  | 7.746     | 366938 |
|           | CMTK A    | 6.488 | 5.469   | 1.414     | 4.796  | 14.107    | 190292 |
|           | CMTK B    | 5.715 | 5.134   | 1.000     | 4.062  | 12.767    | 195356 |
|           | CMTK C    | 4.265 | 3.892   | 0.707     | 3.000  | 9.539     | 250136 |
|           | Elastix A | 7.710 | 7.839   | 1.225     | 5.050  | 18.083    | 267584 |
| Elastix B | 4.410     | 4.285 | 0.707   | 3.000     | 9.618  | 245972    |        |
| Tefor     | ANTs A    | 3.053 | 2.744   | 0.707     | 2.236  | 6.364     | 224680 |
|           | ANTs B    | 3.920 | 3.501   | 0.707     | 2.915  | 8.544     | 228986 |
|           | ANTs C    | 3.954 | 3.505   | 0.707     | 2.915  | 8.860     | 252914 |
|           | CMTK A    | 4.384 | 3.963   | 0.707     | 3.000  | 10.296    | 206084 |
|           | CMTK B    | 4.337 | 3.946   | 0.707     | 3.000  | 10.124    | 208340 |
|           | CMTK C    | 4.332 | 3.818   | 0.707     | 3.162  | 9.539     | 203452 |
|           | Elastix A | 3.112 | 2.640   | 0.707     | 2.449  | 6.205     | 228276 |
| Elastix B | 3.587     | 3.086 | 0.707   | 2.646     | 7.616  | 206388    |        |

**Table S48.** IB.L : inferior bridge

| Template | Algorithm | Mean  | Std dev | 10th perc | median | 90th perc | N     |
|----------|-----------|-------|---------|-----------|--------|-----------|-------|
| JFRC2010 | ANTs A    | 3.926 | 2.876   | 1.000     | 3.240  | 7.550     | 81610 |
|          | ANTs B    | 3.925 | 2.699   | 1.000     | 3.317  | 7.583     | 80346 |
|          | ANTs C    | 4.335 | 2.831   | 1.225     | 3.808  | 8.276     | 87234 |
|          | CMTK A    | 5.173 | 5.092   | 1.000     | 3.808  | 9.849     | 76872 |
|          | CMTK B    | 4.921 | 4.715   | 1.000     | 3.606  | 9.434     | 77040 |
|          | CMTK C    | 4.630 | 3.994   | 1.000     | 3.674  | 8.367     | 81250 |
|          | Elastix A | 3.316 | 2.154   | 1.000     | 2.915  | 6.124     | 87064 |
|          | Elastix B | 3.583 | 2.412   | 1.000     | 3.000  | 7.000     | 91986 |
| JFRC2013 | ANTs A    | 3.112 | 2.133   | 1.000     | 2.646  | 5.831     | 79242 |
|          | ANTs B    | 4.120 | 2.866   | 1.000     | 3.536  | 8.062     | 96460 |
|          | ANTs C    | 4.268 | 3.111   | 1.000     | 3.536  | 8.972     | 84404 |
|          | CMTK A    | 3.225 | 2.191   | 1.000     | 2.828  | 6.083     | 74162 |
|          | CMTK B    | 3.450 | 2.314   | 1.000     | 3.000  | 6.519     | 70046 |
|          | CMTK C    | 4.372 | 2.934   | 1.225     | 3.808  | 8.337     | 67292 |
|          | Elastix A | 3.155 | 2.036   | 1.000     | 2.828  | 5.701     | 77368 |
|          | Elastix B | 3.127 | 2.053   | 1.000     | 2.646  | 5.788     | 81338 |
| JRC2018  | ANTs A    | 3.006 | 2.071   | 0.707     | 2.550  | 5.701     | 80720 |
|          | ANTs B    | 3.131 | 2.137   | 1.000     | 2.646  | 5.788     | 74448 |
|          | ANTs C    | 3.297 | 2.190   | 1.000     | 2.915  | 6.083     | 74372 |
|          | CMTK A    | 3.208 | 2.179   | 1.000     | 2.828  | 6.083     | 79102 |
|          | CMTK B    | 3.173 | 2.136   | 1.000     | 2.646  | 6.042     | 78520 |
|          | CMTK C    | 3.158 | 2.128   | 1.000     | 2.646  | 5.874     | 77660 |
|          | Elastix A | 3.248 | 2.125   | 1.000     | 2.915  | 6.042     | 76480 |
|          | Elastix B | 3.083 | 2.079   | 1.000     | 2.646  | 5.831     | 83538 |
| FCWB     | ANTs A    | 3.393 | 2.406   | 1.000     | 2.915  | 6.245     | 77720 |
|          | ANTs B    | 4.198 | 2.897   | 1.225     | 3.536  | 8.515     | 85288 |
|          | ANTs C    | 4.050 | 2.615   | 1.225     | 3.536  | 7.649     | 95052 |
|          | CMTK A    | 5.627 | 5.160   | 1.414     | 4.123  | 11.597    | 63522 |
|          | CMTK B    | 5.410 | 5.394   | 1.225     | 3.674  | 11.790    | 63758 |
|          | CMTK C    | 3.874 | 2.625   | 1.000     | 3.317  | 7.211     | 66826 |
|          | Elastix A | 6.525 | 7.232   | 1.414     | 4.528  | 11.790    | 83412 |
|          | Elastix B | 4.357 | 3.178   | 1.000     | 3.606  | 8.544     | 89336 |
| Tefor    | ANTs A    | 3.012 | 2.067   | 0.707     | 2.550  | 5.701     | 80992 |
|          | ANTs B    | 3.660 | 2.400   | 1.000     | 3.162  | 6.708     | 77408 |
|          | ANTs C    | 3.975 | 2.649   | 1.000     | 3.536  | 7.550     | 72348 |
|          | CMTK A    | 3.683 | 2.532   | 1.000     | 3.082  | 7.211     | 90296 |
|          | CMTK B    | 3.724 | 2.548   | 1.000     | 3.162  | 7.314     | 92468 |
|          | CMTK C    | 3.980 | 2.613   | 1.000     | 3.536  | 7.382     | 81148 |
|          | Elastix A | 3.209 | 2.125   | 1.000     | 2.828  | 6.042     | 91852 |
|          | Elastix B | 3.361 | 2.214   | 1.000     | 2.915  | 6.442     | 99390 |

Table S49. ATLL : antler

| Template | Algorithm | Mean  | Std dev | 10th perc | median | 90th perc | N      |
|----------|-----------|-------|---------|-----------|--------|-----------|--------|
| JFRC2010 | ANTs A    | 7.843 | 6.117   | 1.414     | 6.364  | 16.310    | 239816 |
|          | ANTs B    | 4.882 | 4.247   | 1.000     | 3.606  | 10.536    | 169636 |
|          | ANTs C    | 5.226 | 4.288   | 1.225     | 4.062  | 10.817    | 145186 |
|          | CMTK A    | 7.478 | 6.081   | 1.581     | 5.745  | 16.093    | 112646 |
|          | CMTK B    | 6.826 | 5.505   | 1.414     | 5.339  | 14.440    | 115154 |
|          | CMTK C    | 6.944 | 5.331   | 1.732     | 5.568  | 13.675    | 145274 |
|          | Elastix A | 5.228 | 4.305   | 1.225     | 4.062  | 10.863    | 138834 |
|          | Elastix B | 7.382 | 6.197   | 1.414     | 5.339  | 16.523    | 114000 |
| JFRC2013 | ANTs A    | 4.344 | 3.985   | 1.000     | 3.082  | 9.301     | 156584 |
|          | ANTs B    | 6.904 | 5.199   | 1.581     | 5.523  | 14.248    | 130784 |
|          | ANTs C    | 5.645 | 4.975   | 1.225     | 4.123  | 12.268    | 149384 |
|          | CMTK A    | 5.374 | 4.354   | 1.225     | 4.123  | 11.247    | 139624 |
|          | CMTK B    | 5.432 | 4.392   | 1.225     | 4.183  | 11.358    | 142824 |
|          | CMTK C    | 5.417 | 4.644   | 1.225     | 4.123  | 11.180    | 178982 |
|          | Elastix A | 5.023 | 4.069   | 1.225     | 3.873  | 10.124    | 141276 |
|          | Elastix B | 5.548 | 4.683   | 1.225     | 4.183  | 11.597    | 129230 |
| JRC2018  | ANTs A    | 4.425 | 3.963   | 1.000     | 3.162  | 9.487     | 150742 |
|          | ANTs B    | 4.932 | 4.289   | 1.000     | 3.606  | 10.700    | 145352 |
|          | ANTs C    | 5.012 | 4.227   | 1.000     | 3.808  | 10.583    | 144126 |
|          | CMTK A    | 4.675 | 4.011   | 1.000     | 3.536  | 9.849     | 128454 |
|          | CMTK B    | 4.576 | 3.993   | 1.000     | 3.464  | 9.644     | 127400 |
|          | CMTK C    | 4.661 | 3.978   | 1.000     | 3.536  | 9.706     | 135654 |
|          | Elastix A | 4.838 | 3.958   | 1.000     | 3.808  | 9.899     | 130144 |
|          | Elastix B | 5.844 | 5.171   | 1.000     | 4.183  | 13.077    | 121474 |
| FCWB     | ANTs A    | 5.445 | 5.399   | 1.000     | 3.536  | 12.806    | 154238 |
|          | ANTs B    | 8.573 | 5.625   | 2.236     | 7.416  | 16.538    | 96860  |
|          | ANTs C    | 7.817 | 5.851   | 1.732     | 6.519  | 15.588    | 124264 |
|          | CMTK A    | 6.758 | 5.417   | 1.581     | 5.099  | 14.832    | 115928 |
|          | CMTK B    | 6.119 | 5.018   | 1.414     | 4.528  | 13.533    | 124330 |
|          | CMTK C    | 6.238 | 5.030   | 1.414     | 4.637  | 13.675    | 142558 |
|          | Elastix A | 8.272 | 5.892   | 1.732     | 7.036  | 16.447    | 117624 |
|          | Elastix B | 9.648 | 7.001   | 2.121     | 7.937  | 20.100    | 94772  |
| Tefor    | ANTs A    | 4.256 | 3.872   | 1.000     | 3.000  | 9.192     | 153390 |
|          | ANTs B    | 4.722 | 4.137   | 1.000     | 3.464  | 10.223    | 161208 |
|          | ANTs C    | 4.981 | 4.023   | 1.000     | 3.808  | 10.607    | 169534 |
|          | CMTK A    | 7.305 | 5.380   | 1.581     | 6.000  | 15.379    | 129854 |
|          | CMTK B    | 6.964 | 5.274   | 1.581     | 5.568  | 14.782    | 122228 |
|          | CMTK C    | 5.181 | 4.484   | 1.000     | 3.808  | 11.336    | 209880 |
|          | Elastix A | 5.339 | 4.350   | 1.225     | 4.062  | 11.380    | 121224 |
|          | Elastix B | 9.298 | 7.235   | 1.732     | 7.314  | 19.925    | 97360  |

Table S50. CRE.L : crepine

| Template | Algorithm | Mean  | Std dev | 10th perc | median | 90th perc | N     |
|----------|-----------|-------|---------|-----------|--------|-----------|-------|
| JFRC2010 | ANTs A    | 7.145 | 8.007   | 1.581     | 4.743  | 13.964    | 91380 |
|          | ANTs B    | 6.229 | 4.282   | 1.581     | 5.292  | 12.410    | 60494 |
|          | ANTs C    | 6.416 | 4.304   | 1.581     | 5.523  | 12.590    | 58210 |
|          | CMTK A    | 6.655 | 5.238   | 1.414     | 5.050  | 14.387    | 60120 |
|          | CMTK B    | 6.406 | 4.971   | 1.581     | 5.000  | 13.583    | 81492 |
|          | CMTK C    | 6.463 | 4.580   | 1.581     | 5.339  | 13.285    | 74938 |
|          | Elastix A | 5.762 | 4.296   | 1.581     | 4.528  | 12.137    | 62808 |
|          | Elastix B | 6.287 | 4.869   | 1.581     | 4.950  | 13.229    | 61956 |
| JFRC2013 | ANTs A    | 5.118 | 3.964   | 1.225     | 3.873  | 10.817    | 67314 |
|          | ANTs B    | 6.594 | 4.532   | 1.732     | 5.568  | 12.806    | 54366 |
|          | ANTs C    | 5.766 | 4.191   | 1.581     | 4.743  | 11.489    | 54350 |
|          | CMTK A    | 5.550 | 4.136   | 1.414     | 4.359  | 11.511    | 68540 |
|          | CMTK B    | 5.647 | 4.233   | 1.414     | 4.528  | 11.597    | 69752 |
|          | CMTK C    | 5.630 | 4.180   | 1.414     | 4.583  | 11.424    | 58542 |
|          | Elastix A | 5.424 | 4.127   | 1.414     | 4.243  | 11.511    | 64554 |
|          | Elastix B | 5.225 | 4.026   | 1.414     | 4.062  | 11.091    | 65702 |
| JRC2018  | ANTs A    | 5.159 | 3.957   | 1.225     | 4.062  | 10.724    | 69302 |
|          | ANTs B    | 5.290 | 4.014   | 1.225     | 4.183  | 10.909    | 68308 |
|          | ANTs C    | 5.245 | 3.992   | 1.414     | 4.123  | 10.817    | 66266 |
|          | CMTK A    | 5.158 | 4.013   | 1.225     | 3.873  | 10.886    | 67844 |
|          | CMTK B    | 5.155 | 3.989   | 1.225     | 3.873  | 10.863    | 67512 |
|          | CMTK C    | 5.207 | 4.011   | 1.414     | 4.062  | 10.977    | 67636 |
|          | Elastix A | 5.180 | 3.918   | 1.414     | 4.062  | 10.817    | 69618 |
|          | Elastix B | 5.303 | 4.103   | 1.414     | 4.123  | 11.358    | 64394 |
| FCWB     | ANTs A    | 5.690 | 4.372   | 1.414     | 4.528  | 11.769    | 56720 |
|          | ANTs B    | 5.220 | 4.126   | 1.000     | 4.062  | 11.068    | 55698 |
|          | ANTs C    | 5.146 | 3.926   | 1.000     | 4.123  | 10.464    | 59852 |
|          | CMTK A    | 6.471 | 4.991   | 1.414     | 5.099  | 13.472    | 51692 |
|          | CMTK B    | 6.402 | 4.772   | 1.581     | 5.196  | 13.151    | 52692 |
|          | CMTK C    | 5.146 | 4.140   | 1.000     | 3.873  | 11.068    | 63016 |
|          | Elastix A | 6.927 | 4.825   | 1.581     | 5.874  | 13.802    | 62632 |
|          | Elastix B | 6.015 | 5.928   | 1.000     | 3.873  | 13.638    | 57326 |
| Tefor    | ANTs A    | 5.088 | 3.903   | 1.225     | 4.000  | 10.607    | 71160 |
|          | ANTs B    | 5.438 | 3.996   | 1.414     | 4.359  | 11.068    | 62306 |
|          | ANTs C    | 5.736 | 4.044   | 1.581     | 4.743  | 11.380    | 67984 |
|          | CMTK A    | 6.099 | 5.023   | 1.414     | 4.472  | 13.416    | 67056 |
|          | CMTK B    | 6.055 | 4.971   | 1.414     | 4.301  | 13.472    | 64964 |
|          | CMTK C    | 5.667 | 4.403   | 1.414     | 4.359  | 12.042    | 67684 |
|          | Elastix A | 5.611 | 4.253   | 1.414     | 4.359  | 11.726    | 63094 |
|          | Elastix B | 6.480 | 5.079   | 1.581     | 4.950  | 13.892    | 57146 |

**Table S51.** MB\_PED.L : pedunculus of adult mushroom body

| Template | Algorithm | Mean  | Std dev | 10th perc | median | 90th perc | N      |
|----------|-----------|-------|---------|-----------|--------|-----------|--------|
| JFRC2010 | ANTs A    | 5.895 | 5.046   | 1.581     | 4.528  | 11.597    | 135494 |
|          | ANTs B    | 5.647 | 4.232   | 1.581     | 4.583  | 10.794    | 93942  |
|          | ANTs C    | 6.059 | 4.522   | 1.581     | 5.000  | 11.619    | 98208  |
|          | CMTK A    | 5.182 | 3.897   | 1.581     | 4.301  | 9.618     | 124950 |
|          | CMTK B    | 5.238 | 4.127   | 1.581     | 4.243  | 9.849     | 121466 |
|          | CMTK C    | 5.962 | 4.319   | 1.732     | 5.050  | 10.977    | 88886  |
|          | Elastix A | 4.942 | 4.069   | 1.414     | 3.873  | 9.513     | 122750 |
|          | Elastix B | 5.055 | 4.310   | 1.414     | 3.873  | 10.025    | 131996 |
| JFRC2013 | ANTs A    | 5.296 | 4.152   | 1.581     | 4.359  | 9.721     | 111872 |
|          | ANTs B    | 6.160 | 4.326   | 1.732     | 5.196  | 11.554    | 93068  |
|          | ANTs C    | 5.942 | 4.297   | 1.581     | 5.000  | 10.977    | 101550 |
|          | CMTK A    | 5.691 | 4.508   | 1.581     | 4.528  | 11.068    | 115624 |
|          | CMTK B    | 5.785 | 4.455   | 1.581     | 4.743  | 10.863    | 108634 |
|          | CMTK C    | 6.098 | 4.247   | 1.732     | 5.196  | 11.203    | 95824  |
|          | Elastix A | 4.934 | 3.981   | 1.414     | 3.873  | 9.487     | 130894 |
|          | Elastix B | 4.890 | 4.075   | 1.225     | 3.808  | 9.644     | 133500 |
| JRC2018  | ANTs A    | 4.678 | 4.021   | 1.225     | 3.606  | 9.000     | 131582 |
|          | ANTs B    | 5.279 | 4.156   | 1.581     | 4.243  | 10.000    | 115318 |
|          | ANTs C    | 5.384 | 4.236   | 1.581     | 4.359  | 10.464    | 122964 |
|          | CMTK A    | 4.724 | 4.148   | 1.225     | 3.606  | 9.247     | 128888 |
|          | CMTK B    | 4.944 | 4.139   | 1.414     | 3.808  | 9.434     | 126064 |
|          | CMTK C    | 5.323 | 4.164   | 1.581     | 4.301  | 9.950     | 119020 |
|          | Elastix A | 4.905 | 4.078   | 1.414     | 3.808  | 9.460     | 123552 |
|          | Elastix B | 4.965 | 4.286   | 1.414     | 3.808  | 9.849     | 123732 |
| FCWB     | ANTs A    | 5.525 | 4.317   | 1.581     | 4.472  | 10.724    | 111644 |
|          | ANTs B    | 5.282 | 3.922   | 1.581     | 4.359  | 10.124    | 79092  |
|          | ANTs C    | 5.348 | 3.989   | 1.581     | 4.472  | 9.950     | 89654  |
|          | CMTK A    | 5.570 | 4.269   | 1.581     | 4.528  | 10.724    | 102496 |
|          | CMTK B    | 5.517 | 4.203   | 1.581     | 4.472  | 10.654    | 97158  |
|          | CMTK C    | 5.266 | 3.814   | 1.581     | 4.359  | 9.899     | 80306  |
|          | Elastix A | 5.428 | 4.186   | 1.581     | 4.472  | 10.149    | 100274 |
|          | Elastix B | 5.563 | 4.439   | 1.581     | 4.359  | 10.909    | 112672 |
| Tefor    | ANTs A    | 4.681 | 3.993   | 1.225     | 3.606  | 9.055     | 133834 |
|          | ANTs B    | 5.442 | 4.207   | 1.581     | 4.359  | 10.223    | 98620  |
|          | ANTs C    | 5.421 | 4.099   | 1.581     | 4.472  | 10.392    | 106004 |
|          | CMTK A    | 6.814 | 6.928   | 1.414     | 4.359  | 17.044    | 138644 |
|          | CMTK B    | 6.370 | 5.807   | 1.581     | 4.528  | 14.765    | 129842 |
|          | CMTK C    | 6.186 | 4.424   | 1.732     | 5.148  | 11.853    | 98746  |
|          | Elastix A | 4.993 | 4.136   | 1.414     | 4.000  | 9.539     | 125584 |
|          | Elastix B | 5.336 | 4.609   | 1.414     | 4.062  | 10.724    | 122576 |

**Table S52.** MB.VL.L : vertical lobe of adult mushroom body

| Template | Algorithm | Mean  | Std dev | 10th perc | median | 90th perc | N      |
|----------|-----------|-------|---------|-----------|--------|-----------|--------|
| JFRC2010 | ANTs A    | 6.261 | 6.063   | 1.225     | 4.183  | 14.036    | 219070 |
|          | ANTs B    | 4.228 | 3.847   | 1.000     | 3.162  | 8.631     | 246608 |
|          | ANTs C    | 4.538 | 3.955   | 1.000     | 3.464  | 9.327     | 226850 |
|          | CMTK A    | 6.603 | 6.355   | 1.414     | 4.472  | 15.556    | 201488 |
|          | CMTK B    | 5.414 | 4.843   | 1.000     | 3.873  | 11.769    | 209146 |
|          | CMTK C    | 5.735 | 5.508   | 1.225     | 4.000  | 12.410    | 235838 |
|          | Elastix A | 4.264 | 3.803   | 1.000     | 3.240  | 8.544     | 252902 |
|          | Elastix B | 5.639 | 5.303   | 1.000     | 3.873  | 12.826    | 221790 |
| JFRC2013 | ANTs A    | 4.092 | 3.702   | 1.000     | 3.000  | 8.276     | 229810 |
|          | ANTs B    | 5.867 | 4.824   | 1.581     | 4.528  | 12.021    | 161752 |
|          | ANTs C    | 5.250 | 4.780   | 1.000     | 3.808  | 10.794    | 168914 |
|          | CMTK A    | 5.086 | 4.257   | 1.225     | 3.808  | 10.630    | 207446 |
|          | CMTK B    | 5.164 | 4.277   | 1.225     | 3.873  | 10.677    | 206382 |
|          | CMTK C    | 4.820 | 4.394   | 1.000     | 3.536  | 10.100    | 182974 |
|          | Elastix A | 4.470 | 3.881   | 1.000     | 3.536  | 8.860     | 219734 |
|          | Elastix B | 4.781 | 4.117   | 1.000     | 3.606  | 9.721     | 209946 |
| JRC2018  | ANTs A    | 4.045 | 3.695   | 1.000     | 3.000  | 8.093     | 239818 |
|          | ANTs B    | 4.313 | 3.797   | 1.000     | 3.240  | 8.746     | 224826 |
|          | ANTs C    | 4.363 | 3.819   | 1.000     | 3.317  | 8.573     | 224532 |
|          | CMTK A    | 4.353 | 3.779   | 1.000     | 3.317  | 8.573     | 223708 |
|          | CMTK B    | 4.317 | 3.745   | 1.000     | 3.317  | 8.515     | 219828 |
|          | CMTK C    | 4.439 | 3.793   | 1.000     | 3.464  | 8.775     | 217188 |
|          | Elastix A | 4.363 | 3.737   | 1.000     | 3.464  | 8.544     | 230346 |
|          | Elastix B | 5.155 | 4.515   | 1.225     | 3.808  | 10.724    | 211664 |
| FCWB     | ANTs A    | 4.683 | 4.373   | 1.000     | 3.317  | 10.025    | 194636 |
|          | ANTs B    | 5.355 | 4.389   | 1.414     | 4.123  | 11.158    | 155400 |
|          | ANTs C    | 5.271 | 4.507   | 1.225     | 3.873  | 10.977    | 184730 |
|          | CMTK A    | 5.598 | 4.750   | 1.414     | 4.183  | 11.790    | 193610 |
|          | CMTK B    | 5.410 | 4.572   | 1.414     | 4.062  | 11.489    | 192134 |
|          | CMTK C    | 5.022 | 4.183   | 1.225     | 3.808  | 10.607    | 178880 |
|          | Elastix A | 6.116 | 4.738   | 1.581     | 4.950  | 12.288    | 183072 |
|          | Elastix B | 7.718 | 7.008   | 1.581     | 5.196  | 18.628    | 162264 |
| Tefor    | ANTs A    | 4.103 | 3.678   | 1.000     | 3.082  | 8.185     | 238708 |
|          | ANTs B    | 4.272 | 3.742   | 1.000     | 3.240  | 8.746     | 229654 |
|          | ANTs C    | 4.688 | 4.236   | 1.000     | 3.536  | 9.618     | 222946 |
|          | CMTK A    | 5.672 | 4.650   | 1.414     | 4.359  | 11.937    | 218430 |
|          | CMTK B    | 5.610 | 4.568   | 1.414     | 4.359  | 11.597    | 218734 |
|          | CMTK C    | 5.211 | 4.507   | 1.225     | 3.808  | 11.180    | 226658 |
|          | Elastix A | 4.530 | 3.883   | 1.000     | 3.536  | 9.220     | 245986 |
|          | Elastix B | 8.394 | 7.716   | 1.581     | 5.431  | 20.445    | 150204 |

**Table S53.** MB\_ML.L : medial lobe of adult mushroom body

| Template | Algorithm | Mean  | Std dev | 10th perc | median | 90th perc | N      |
|----------|-----------|-------|---------|-----------|--------|-----------|--------|
| JFRC2010 | ANTs A    | 5.633 | 6.448   | 0.707     | 3.240  | 15.636    | 336696 |
|          | ANTs B    | 3.763 | 3.134   | 0.707     | 3.000  | 7.314     | 351018 |
|          | ANTs C    | 3.552 | 3.075   | 0.707     | 2.915  | 7.071     | 401822 |
|          | CMTK A    | 3.703 | 3.276   | 0.707     | 2.915  | 7.280     | 369328 |
|          | CMTK B    | 3.687 | 3.450   | 0.707     | 2.915  | 7.106     | 373918 |
|          | CMTK C    | 4.291 | 3.846   | 1.000     | 3.240  | 8.544     | 336458 |
|          | Elastix A | 2.995 | 2.373   | 0.707     | 2.550  | 5.745     | 388882 |
|          | Elastix B | 2.908 | 2.325   | 0.707     | 2.345  | 5.701     | 398758 |
| JFRC2013 | ANTs A    | 2.870 | 2.450   | 0.707     | 2.236  | 5.701     | 392302 |
|          | ANTs B    | 4.250 | 3.381   | 1.000     | 3.536  | 8.000     | 277230 |
|          | ANTs C    | 3.783 | 3.161   | 1.000     | 3.000  | 7.211     | 295372 |
|          | CMTK A    | 2.938 | 2.383   | 0.707     | 2.345  | 5.788     | 420952 |
|          | CMTK B    | 2.952 | 2.406   | 0.707     | 2.345  | 5.788     | 412536 |
|          | CMTK C    | 3.427 | 2.583   | 1.000     | 2.915  | 6.557     | 335392 |
|          | Elastix A | 2.970 | 2.436   | 0.707     | 2.449  | 5.745     | 375750 |
|          | Elastix B | 2.922 | 2.414   | 0.707     | 2.345  | 5.745     | 397916 |
| JRC2018  | ANTs A    | 2.814 | 2.398   | 0.707     | 2.236  | 5.568     | 397460 |
|          | ANTs B    | 3.253 | 2.697   | 0.707     | 2.646  | 6.364     | 381326 |
|          | ANTs C    | 3.358 | 2.782   | 0.707     | 2.646  | 6.557     | 385464 |
|          | CMTK A    | 2.841 | 2.378   | 0.707     | 2.236  | 5.568     | 441218 |
|          | CMTK B    | 2.820 | 2.371   | 0.707     | 2.236  | 5.568     | 421384 |
|          | CMTK C    | 2.869 | 2.410   | 0.707     | 2.345  | 5.701     | 403114 |
|          | Elastix A | 2.966 | 2.398   | 0.707     | 2.449  | 5.745     | 391286 |
|          | Elastix B | 2.990 | 2.569   | 0.707     | 2.345  | 5.831     | 386058 |
| FCWB     | ANTs A    | 2.879 | 2.536   | 0.707     | 2.236  | 5.701     | 408720 |
|          | ANTs B    | 3.688 | 2.858   | 1.000     | 3.000  | 7.071     | 325596 |
|          | ANTs C    | 3.547 | 3.059   | 0.707     | 2.915  | 6.928     | 361668 |
|          | CMTK A    | 3.415 | 2.967   | 0.707     | 2.915  | 6.557     | 379116 |
|          | CMTK B    | 3.280 | 3.081   | 0.707     | 2.646  | 6.245     | 397938 |
|          | CMTK C    | 3.345 | 2.687   | 0.707     | 2.646  | 6.519     | 341304 |
|          | Elastix A | 4.480 | 4.266   | 1.000     | 3.808  | 8.307     | 305690 |
|          | Elastix B | 3.419 | 2.633   | 0.707     | 2.915  | 6.671     | 373924 |
| Tefor    | ANTs A    | 2.856 | 2.475   | 0.707     | 2.236  | 5.701     | 403824 |
|          | ANTs B    | 3.583 | 2.955   | 0.707     | 2.915  | 6.856     | 346276 |
|          | ANTs C    | 3.522 | 2.991   | 0.707     | 2.915  | 6.708     | 395204 |
|          | CMTK A    | 3.302 | 2.756   | 0.707     | 2.646  | 6.671     | 431620 |
|          | CMTK B    | 3.429 | 2.851   | 0.707     | 2.828  | 6.856     | 402012 |
|          | CMTK C    | 3.736 | 3.057   | 1.000     | 3.000  | 7.106     | 375272 |
|          | Elastix A | 3.240 | 2.631   | 0.707     | 2.646  | 6.124     | 356548 |
|          | Elastix B | 3.346 | 2.919   | 0.707     | 2.828  | 6.403     | 327064 |

Table S54. FLA.L : flange

| Template | Algorithm | Mean  | Std dev | 10th perc | median | 90th perc | N      |
|----------|-----------|-------|---------|-----------|--------|-----------|--------|
| JFRC2010 | ANTs A    | 8.631 | 6.875   | 2.236     | 6.856  | 16.778    | 362688 |
|          | ANTs B    | 6.772 | 5.477   | 2.000     | 5.523  | 12.590    | 338210 |
|          | ANTs C    | 7.036 | 5.551   | 2.000     | 5.701  | 13.285    | 401672 |
|          | CMTK A    | 8.762 | 6.656   | 2.236     | 6.964  | 17.958    | 409008 |
|          | CMTK B    | 7.881 | 5.869   | 2.121     | 6.364  | 15.906    | 383972 |
|          | CMTK C    | 7.383 | 5.528   | 2.121     | 5.916  | 14.526    | 433212 |
|          | Elastix A | 5.820 | 5.269   | 1.581     | 4.359  | 11.597    | 335456 |
|          | Elastix B | 5.722 | 5.012   | 1.581     | 4.359  | 11.269    | 352972 |
| JFRC2013 | ANTs A    | 5.921 | 5.503   | 1.581     | 4.528  | 11.619    | 398430 |
|          | ANTs B    | 6.585 | 5.388   | 1.732     | 5.196  | 12.845    | 388774 |
|          | ANTs C    | 6.848 | 5.833   | 1.581     | 5.292  | 13.711    | 393766 |
|          | CMTK A    | 7.142 | 7.562   | 1.581     | 5.000  | 14.387    | 424038 |
|          | CMTK B    | 7.345 | 7.940   | 1.581     | 5.099  | 14.213    | 422190 |
|          | CMTK C    | 6.931 | 5.242   | 2.000     | 5.701  | 13.285    | 434874 |
|          | Elastix A | 5.742 | 5.123   | 1.581     | 4.359  | 11.358    | 427686 |
|          | Elastix B | 5.650 | 5.276   | 1.414     | 4.183  | 11.402    | 438740 |
| JRC2018  | ANTs A    | 5.663 | 5.194   | 1.414     | 4.243  | 11.336    | 405342 |
|          | ANTs B    | 5.857 | 5.177   | 1.581     | 4.528  | 11.402    | 389376 |
|          | ANTs C    | 6.158 | 5.304   | 1.581     | 4.743  | 12.166    | 399826 |
|          | CMTK A    | 5.602 | 5.111   | 1.414     | 4.243  | 11.068    | 426888 |
|          | CMTK B    | 5.636 | 5.213   | 1.414     | 4.243  | 11.180    | 414846 |
|          | CMTK C    | 5.794 | 5.173   | 1.581     | 4.472  | 11.336    | 401586 |
|          | Elastix A | 5.619 | 5.051   | 1.414     | 4.301  | 11.091    | 403720 |
|          | Elastix B | 5.529 | 5.317   | 1.414     | 4.123  | 10.724    | 436688 |
| FCWB     | ANTs A    | 6.237 | 5.717   | 1.581     | 4.690  | 12.268    | 398870 |
|          | ANTs B    | 6.452 | 5.341   | 1.732     | 5.000  | 12.669    | 336656 |
|          | ANTs C    | 6.778 | 5.600   | 1.732     | 5.339  | 13.058    | 359718 |
|          | CMTK A    | 8.018 | 6.591   | 2.121     | 6.364  | 15.668    | 388196 |
|          | CMTK B    | 7.788 | 6.416   | 2.121     | 6.083  | 15.395    | 365136 |
|          | CMTK C    | 8.460 | 6.896   | 2.121     | 6.442  | 17.479    | 344492 |
|          | Elastix A | 9.498 | 8.798   | 2.345     | 7.416  | 17.903    | 384198 |
|          | Elastix B | 8.059 | 9.535   | 1.732     | 5.568  | 15.199    | 405130 |
| Tefor    | ANTs A    | 5.687 | 5.248   | 1.414     | 4.301  | 11.358    | 403146 |
|          | ANTs B    | 6.159 | 5.413   | 1.581     | 4.796  | 11.874    | 354400 |
|          | ANTs C    | 6.979 | 5.497   | 2.000     | 5.701  | 13.379    | 360948 |
|          | CMTK A    | 7.749 | 6.901   | 1.581     | 5.568  | 16.643    | 400468 |
|          | CMTK B    | 7.790 | 6.803   | 1.581     | 5.701  | 16.523    | 388860 |
|          | CMTK C    | 7.053 | 5.804   | 1.732     | 5.523  | 14.053    | 371694 |
|          | Elastix A | 5.595 | 5.035   | 1.414     | 4.183  | 11.180    | 360282 |
|          | Elastix B | 5.576 | 5.172   | 1.414     | 4.183  | 11.068    | 382420 |

Table S55. LOP.L : lobula plate



| Template | Algorithm | Mean  | Std dev | 10th perc | median | 90th perc | N      |
|----------|-----------|-------|---------|-----------|--------|-----------|--------|
| JFRC2010 | ANTs A    | 5.083 | 4.229   | 1.000     | 3.808  | 10.977    | 272138 |
|          | ANTs B    | 4.445 | 3.253   | 1.000     | 3.606  | 9.083     | 193424 |
|          | ANTs C    | 4.761 | 3.300   | 1.000     | 4.062  | 9.539     | 229120 |
|          | CMTK A    | 5.421 | 4.942   | 1.000     | 3.674  | 12.767    | 215634 |
|          | CMTK B    | 4.547 | 4.221   | 1.000     | 3.240  | 9.874     | 236674 |
|          | CMTK C    | 4.402 | 3.624   | 1.000     | 3.240  | 9.592     | 220518 |
|          | Elastix A | 3.227 | 2.491   | 0.707     | 2.646  | 6.481     | 226828 |
|          | Elastix B | 3.266 | 2.638   | 0.707     | 2.550  | 6.671     | 249262 |
| JFRC2013 | ANTs A    | 3.837 | 3.072   | 0.707     | 3.000  | 8.185     | 219702 |
|          | ANTs B    | 4.390 | 3.105   | 1.000     | 3.674  | 8.746     | 226656 |
|          | ANTs C    | 4.608 | 3.175   | 1.000     | 3.873  | 9.110     | 228424 |
|          | CMTK A    | 3.381 | 2.529   | 0.707     | 2.646  | 6.964     | 180538 |
|          | CMTK B    | 3.580 | 2.653   | 1.000     | 2.915  | 7.246     | 166454 |
|          | CMTK C    | 4.730 | 3.301   | 1.000     | 4.062  | 9.460     | 136042 |
|          | Elastix A | 3.323 | 2.621   | 0.707     | 2.646  | 6.819     | 220190 |
|          | Elastix B | 3.246 | 2.504   | 0.707     | 2.646  | 6.557     | 232012 |
| JRC2018  | ANTs A    | 3.377 | 2.643   | 0.707     | 2.646  | 6.856     | 233940 |
|          | ANTs B    | 3.677 | 2.885   | 0.707     | 2.915  | 7.416     | 234506 |
|          | ANTs C    | 3.980 | 3.241   | 1.000     | 3.082  | 8.155     | 247940 |
|          | CMTK A    | 3.578 | 2.779   | 0.707     | 2.915  | 7.416     | 231020 |
|          | CMTK B    | 3.521 | 2.729   | 0.707     | 2.915  | 7.246     | 229874 |
|          | CMTK C    | 3.531 | 2.737   | 0.707     | 2.915  | 7.246     | 228440 |
|          | Elastix A | 3.542 | 2.666   | 0.707     | 2.915  | 7.106     | 216916 |
|          | Elastix B | 3.319 | 2.578   | 0.707     | 2.646  | 6.708     | 235262 |
| FCWB     | ANTs A    | 4.420 | 3.391   | 1.000     | 3.536  | 9.220     | 189324 |
|          | ANTs B    | 5.077 | 3.406   | 1.225     | 4.359  | 9.849     | 186316 |
|          | ANTs C    | 5.080 | 3.429   | 1.225     | 4.359  | 9.874     | 205584 |
|          | CMTK A    | 5.807 | 5.115   | 1.225     | 4.528  | 11.358    | 135822 |
|          | CMTK B    | 5.475 | 5.004   | 1.000     | 4.243  | 10.724    | 167728 |
|          | CMTK C    | 4.986 | 3.759   | 1.000     | 4.062  | 10.536    | 147642 |
|          | Elastix A | 6.782 | 6.050   | 1.581     | 5.568  | 11.874    | 162078 |
|          | Elastix B | 4.127 | 3.456   | 1.000     | 3.082  | 8.888     | 193698 |
| Tefor    | ANTs A    | 3.341 | 2.612   | 0.707     | 2.646  | 6.708     | 228940 |
|          | ANTs B    | 4.523 | 3.262   | 1.000     | 3.808  | 9.165     | 176804 |
|          | ANTs C    | 5.212 | 3.790   | 1.225     | 4.301  | 10.583    | 195598 |
|          | CMTK A    | 4.028 | 3.049   | 1.000     | 3.240  | 8.426     | 215812 |
|          | CMTK B    | 4.164 | 3.211   | 1.000     | 3.317  | 8.746     | 207496 |
|          | CMTK C    | 4.652 | 3.359   | 1.000     | 3.808  | 9.301     | 169744 |
|          | Elastix A | 3.223 | 2.494   | 0.707     | 2.646  | 6.481     | 221016 |
|          | Elastix B | 3.029 | 2.442   | 0.707     | 2.345  | 6.325     | 256792 |

Table S56. PB : protocerebral bridge

| Template | Algorithm | Mean  | Std dev | 10th perc | median | 90th perc | N       |
|----------|-----------|-------|---------|-----------|--------|-----------|---------|
| JFRC2010 | ANTs A    | 5.077 | 5.521   | 1.225     | 3.536  | 10.320    | 1320934 |
|          | ANTs B    | 3.626 | 2.491   | 1.225     | 3.162  | 6.364     | 1378504 |
|          | ANTs C    | 3.687 | 2.552   | 1.225     | 3.240  | 6.442     | 1538688 |
|          | CMTK A    | 4.100 | 3.519   | 1.225     | 3.240  | 7.280     | 1392898 |
|          | CMTK B    | 3.798 | 2.808   | 1.225     | 3.240  | 6.708     | 1415636 |
|          | CMTK C    | 4.126 | 3.226   | 1.225     | 3.464  | 7.550     | 1351974 |
|          | Elastix A | 3.282 | 2.046   | 1.000     | 3.000  | 5.745     | 1433024 |
|          | Elastix B | 3.365 | 2.045   | 1.000     | 3.000  | 5.916     | 1500192 |
| JFRC2013 | ANTs A    | 3.265 | 1.967   | 1.000     | 3.000  | 5.745     | 1545570 |
|          | ANTs B    | 4.382 | 3.871   | 1.225     | 3.317  | 8.396     | 1084472 |
|          | ANTs C    | 4.133 | 3.487   | 1.225     | 3.240  | 7.649     | 1202770 |
|          | CMTK A    | 3.513 | 2.322   | 1.000     | 3.082  | 6.205     | 1462514 |
|          | CMTK B    | 3.561 | 2.364   | 1.000     | 3.082  | 6.364     | 1412544 |
|          | CMTK C    | 3.782 | 2.740   | 1.225     | 3.162  | 6.856     | 1126876 |
|          | Elastix A | 3.266 | 1.984   | 1.000     | 3.000  | 5.745     | 1508478 |
|          | Elastix B | 3.241 | 1.938   | 1.000     | 2.915  | 5.701     | 1567854 |
| JRC2018  | ANTs A    | 3.177 | 1.884   | 1.000     | 2.915  | 5.568     | 1575740 |
|          | ANTs B    | 3.551 | 2.333   | 1.000     | 3.162  | 6.205     | 1454164 |
|          | ANTs C    | 3.697 | 2.457   | 1.225     | 3.240  | 6.557     | 1474432 |
|          | CMTK A    | 3.191 | 1.878   | 1.000     | 2.915  | 5.568     | 1604044 |
|          | CMTK B    | 3.201 | 1.867   | 1.000     | 2.915  | 5.568     | 1605078 |
|          | CMTK C    | 3.283 | 1.956   | 1.000     | 3.000  | 5.745     | 1577672 |
|          | Elastix A | 3.278 | 1.957   | 1.000     | 3.000  | 5.745     | 1571160 |
|          | Elastix B | 3.258 | 1.923   | 1.000     | 3.000  | 5.701     | 1577384 |
| FCWB     | ANTs A    | 3.610 | 2.495   | 1.000     | 3.082  | 6.403     | 1499740 |
|          | ANTs B    | 4.067 | 3.255   | 1.225     | 3.240  | 7.517     | 1022826 |
|          | ANTs C    | 4.352 | 3.775   | 1.225     | 3.317  | 8.307     | 1150918 |
|          | CMTK A    | 3.710 | 2.592   | 1.225     | 3.240  | 6.557     | 1546656 |
|          | CMTK B    | 3.731 | 2.659   | 1.225     | 3.240  | 6.557     | 1535038 |
|          | CMTK C    | 3.763 | 2.616   | 1.225     | 3.240  | 6.671     | 1414018 |
|          | Elastix A | 3.745 | 2.440   | 1.225     | 3.317  | 6.633     | 1449056 |
|          | Elastix B | 3.669 | 2.483   | 1.000     | 3.162  | 6.557     | 1464562 |
| Tefor    | ANTs A    | 3.219 | 1.905   | 1.000     | 2.915  | 5.657     | 1573310 |
|          | ANTs B    | 3.530 | 2.354   | 1.000     | 3.082  | 6.164     | 1479424 |
|          | ANTs C    | 3.860 | 3.124   | 1.225     | 3.240  | 6.708     | 1554168 |
|          | CMTK A    | 3.786 | 2.626   | 1.000     | 3.240  | 6.856     | 1546958 |
|          | CMTK B    | 3.754 | 2.596   | 1.000     | 3.240  | 6.708     | 1583232 |
|          | CMTK C    | 4.052 | 3.224   | 1.225     | 3.240  | 7.416     | 1560302 |
|          | Elastix A | 3.358 | 2.037   | 1.000     | 3.000  | 5.874     | 1516002 |
|          | Elastix B | 3.752 | 2.534   | 1.225     | 3.240  | 6.819     | 1508102 |

Table S57. ALL : adult antennal lobe

| Template  | Algorithm | Mean  | Std dev | 10th perc | median | 90th perc | N       |
|-----------|-----------|-------|---------|-----------|--------|-----------|---------|
| JFRC2010  | ANTs A    | 6.214 | 5.692   | 1.581     | 4.950  | 11.726    | 3208676 |
|           | ANTs B    | 5.101 | 4.599   | 1.581     | 4.301  | 8.860     | 2887600 |
|           | ANTs C    | 5.413 | 4.467   | 1.581     | 4.583  | 9.513     | 3165268 |
|           | CMTK A    | 6.169 | 5.528   | 1.581     | 4.950  | 11.424    | 3100936 |
|           | CMTK B    | 5.857 | 5.420   | 1.581     | 4.690  | 10.607    | 3023396 |
|           | CMTK C    | 6.269 | 5.209   | 1.732     | 5.148  | 11.203    | 2840876 |
|           | Elastix A | 4.853 | 4.440   | 1.581     | 4.123  | 8.396     | 3003908 |
| Elastix B | 4.947     | 4.383 | 1.581   | 4.243     | 8.602  | 3015102   |         |
| JFRC2013  | ANTs A    | 4.898 | 4.452   | 1.581     | 4.123  | 8.544     | 3117410 |
|           | ANTs B    | 5.354 | 4.713   | 1.581     | 4.528  | 9.327     | 2892702 |
|           | ANTs C    | 5.629 | 4.817   | 1.581     | 4.743  | 9.950     | 3018516 |
|           | CMTK A    | 6.786 | 7.513   | 1.732     | 5.000  | 11.853    | 2609038 |
|           | CMTK B    | 7.041 | 8.260   | 1.732     | 5.050  | 11.937    | 2576206 |
|           | CMTK C    | 6.090 | 4.471   | 2.121     | 5.339  | 10.464    | 2663474 |
|           | Elastix A | 4.892 | 4.286   | 1.581     | 4.183  | 8.544     | 3069924 |
| Elastix B | 4.922     | 4.402 | 1.581   | 4.183     | 8.631  | 3050764   |         |
| JRC2018   | ANTs A    | 4.778 | 4.232   | 1.581     | 4.062  | 8.337     | 3135938 |
|           | ANTs B    | 5.037 | 4.500   | 1.581     | 4.243  | 8.775     | 3102894 |
|           | ANTs C    | 5.550 | 4.647   | 1.581     | 4.583  | 10.000    | 3145260 |
|           | CMTK A    | 4.826 | 4.367   | 1.581     | 4.123  | 8.337     | 3073602 |
|           | CMTK B    | 4.821 | 4.426   | 1.581     | 4.123  | 8.307     | 3085844 |
|           | CMTK C    | 4.912 | 4.370   | 1.581     | 4.183  | 8.515     | 3136598 |
|           | Elastix A | 4.898 | 4.860   | 1.581     | 4.123  | 8.337     | 3036246 |
| Elastix B | 4.960     | 4.595 | 1.581   | 4.183     | 8.544  | 3024912   |         |
| FCWB      | ANTs A    | 5.014 | 4.453   | 1.581     | 4.243  | 8.775     | 3183810 |
|           | ANTs B    | 5.481 | 4.718   | 1.581     | 4.690  | 9.513     | 3063022 |
|           | ANTs C    | 6.039 | 4.628   | 2.000     | 5.196  | 10.700    | 3139250 |
|           | CMTK A    | 6.419 | 5.405   | 1.732     | 5.148  | 12.247    | 3092300 |
|           | CMTK B    | 6.099 | 5.175   | 1.732     | 5.000  | 11.247    | 3118278 |
|           | CMTK C    | 6.466 | 5.424   | 2.000     | 5.339  | 11.511    | 2966210 |
|           | Elastix A | 7.160 | 7.213   | 2.121     | 5.745  | 13.172    | 3312420 |
| Elastix B | 6.300     | 6.954 | 1.732   | 5.000     | 11.424 | 3294236   |         |
| Tefor     | ANTs A    | 4.747 | 4.246   | 1.414     | 4.062  | 8.307     | 3107898 |
|           | ANTs B    | 5.063 | 4.669   | 1.581     | 4.183  | 8.860     | 2912902 |
|           | ANTs C    | 5.747 | 5.048   | 1.581     | 4.743  | 10.124    | 3115598 |
|           | CMTK A    | 6.855 | 7.161   | 1.581     | 4.743  | 14.248    | 2831230 |
|           | CMTK B    | 6.860 | 7.124   | 1.581     | 4.743  | 14.300    | 2839816 |
|           | CMTK C    | 6.573 | 7.246   | 1.581     | 4.743  | 11.874    | 2736262 |
|           | Elastix A | 4.830 | 4.531   | 1.581     | 4.123  | 8.367     | 2928176 |
| Elastix B | 4.871     | 4.529 | 1.581   | 4.123     | 8.515  | 2906158   |         |

**Table S58.** ME.L : medulla

| Template | Algorithm | Mean  | Std dev | 10th perc | median | 90th perc | N      |
|----------|-----------|-------|---------|-----------|--------|-----------|--------|
| JFRC2010 | ANTs A    | 5.477 | 6.140   | 0.707     | 3.317  | 13.229    | 606516 |
|          | ANTs B    | 4.670 | 4.987   | 0.707     | 2.915  | 11.068    | 542156 |
|          | ANTs C    | 4.853 | 5.318   | 0.707     | 2.915  | 11.619    | 587638 |
|          | CMTK A    | 5.890 | 6.810   | 0.707     | 3.162  | 15.395    | 642956 |
|          | CMTK B    | 6.572 | 7.608   | 0.707     | 3.606  | 17.521    | 698112 |
|          | CMTK C    | 6.180 | 6.991   | 0.707     | 3.240  | 16.263    | 566916 |
|          | Elastix A | 3.834 | 4.291   | 0.707     | 2.236  | 9.110     | 492408 |
|          | Elastix B | 4.177 | 4.764   | 0.707     | 2.236  | 10.512    | 510852 |
| JFRC2013 | ANTs A    | 4.129 | 4.721   | 0.707     | 2.345  | 10.075    | 580284 |
|          | ANTs B    | 5.679 | 5.772   | 0.707     | 3.808  | 13.416    | 500620 |
|          | ANTs C    | 5.339 | 5.576   | 0.707     | 3.464  | 12.767    | 558630 |
|          | CMTK A    | 5.027 | 4.664   | 1.000     | 3.606  | 10.909    | 493046 |
|          | CMTK B    | 5.031 | 4.580   | 1.000     | 3.674  | 10.817    | 514176 |
|          | CMTK C    | 5.827 | 5.227   | 1.000     | 4.243  | 12.649    | 486968 |
|          | Elastix A | 3.814 | 4.247   | 0.707     | 2.236  | 9.055     | 545258 |
|          | Elastix B | 3.862 | 4.464   | 0.707     | 2.236  | 9.083     | 539860 |
| JRC2018  | ANTs A    | 3.767 | 4.286   | 0.707     | 2.121  | 9.083     | 568444 |
|          | ANTs B    | 4.289 | 5.007   | 0.707     | 2.236  | 10.817    | 565658 |
|          | ANTs C    | 4.532 | 5.175   | 0.707     | 2.646  | 11.000    | 601494 |
|          | CMTK A    | 3.818 | 4.186   | 0.707     | 2.236  | 9.055     | 573080 |
|          | CMTK B    | 3.792 | 4.268   | 0.707     | 2.236  | 9.083     | 560844 |
|          | CMTK C    | 4.090 | 4.713   | 0.707     | 2.236  | 9.950     | 575064 |
|          | Elastix A | 3.712 | 4.114   | 0.707     | 2.236  | 8.803     | 533126 |
|          | Elastix B | 3.859 | 4.255   | 0.707     | 2.236  | 9.247     | 543210 |
| FCWB     | ANTs A    | 5.032 | 5.245   | 0.707     | 3.464  | 11.068    | 560066 |
|          | ANTs B    | 5.343 | 5.448   | 0.707     | 3.606  | 12.390    | 493738 |
|          | ANTs C    | 5.289 | 5.464   | 0.707     | 3.536  | 12.227    | 574654 |
|          | CMTK A    | 5.321 | 5.640   | 0.707     | 3.536  | 12.450    | 535526 |
|          | CMTK B    | 5.213 | 5.470   | 0.707     | 3.536  | 12.021    | 544466 |
|          | CMTK C    | 4.920 | 5.019   | 0.707     | 3.240  | 11.446    | 526058 |
|          | Elastix A | 5.324 | 5.923   | 0.707     | 3.162  | 13.285    | 490822 |
|          | Elastix B | 4.630 | 5.219   | 0.707     | 2.550  | 11.769    | 492544 |
| Tefor    | ANTs A    | 3.820 | 4.392   | 0.707     | 2.121  | 9.220     | 579900 |
|          | ANTs B    | 4.547 | 4.824   | 0.707     | 2.915  | 10.770    | 584556 |
|          | ANTs C    | 4.987 | 5.100   | 0.707     | 3.317  | 11.424    | 631596 |
|          | CMTK A    | 5.635 | 7.627   | 0.707     | 2.449  | 15.906    | 586094 |
|          | CMTK B    | 5.655 | 7.379   | 0.707     | 2.646  | 15.182    | 581586 |
|          | CMTK C    | 5.305 | 5.935   | 0.707     | 3.162  | 13.058    | 631288 |
|          | Elastix A | 3.724 | 4.277   | 0.707     | 2.121  | 8.972     | 539944 |
|          | Elastix B | 4.110 | 4.671   | 0.707     | 2.236  | 10.247    | 546230 |

**Table S59.** SLP.L : superior lateral protocerebrum

| Template | Algorithm | Mean  | Std dev | 10th perc | median | 90th perc | N      |
|----------|-----------|-------|---------|-----------|--------|-----------|--------|
| JFRC2010 | ANTs A    | 8.202 | 5.958   | 2.121     | 6.964  | 15.953    | 157422 |
|          | ANTs B    | 5.008 | 4.548   | 1.000     | 3.674  | 10.536    | 99662  |
|          | ANTs C    | 5.419 | 4.869   | 1.000     | 4.000  | 11.533    | 100246 |
|          | CMTK A    | 5.625 | 4.722   | 1.000     | 4.359  | 12.042    | 93114  |
|          | CMTK B    | 5.574 | 4.760   | 1.000     | 4.243  | 12.042    | 91852  |
|          | CMTK C    | 6.369 | 5.292   | 1.225     | 4.796  | 14.000    | 89592  |
|          | Elastix A | 5.266 | 4.358   | 1.000     | 4.123  | 10.817    | 99198  |
|          | Elastix B | 5.711 | 4.604   | 1.225     | 4.528  | 11.790    | 100632 |
| JFRC2013 | ANTs A    | 4.915 | 4.247   | 1.000     | 3.808  | 9.995     | 99962  |
|          | ANTs B    | 6.260 | 5.076   | 1.414     | 4.950  | 13.229    | 101214 |
|          | ANTs C    | 5.382 | 4.396   | 1.225     | 4.243  | 10.817    | 105364 |
|          | CMTK A    | 5.675 | 4.621   | 1.000     | 4.472  | 12.104    | 110080 |
|          | CMTK B    | 5.762 | 4.718   | 1.225     | 4.528  | 12.390    | 109792 |
|          | CMTK C    | 5.857 | 4.366   | 1.414     | 4.950  | 11.511    | 105472 |
|          | Elastix A | 5.131 | 4.446   | 1.000     | 3.873  | 10.583    | 100470 |
|          | Elastix B | 5.238 | 4.455   | 1.000     | 4.062  | 11.023    | 99722  |
| JRC2018  | ANTs A    | 4.822 | 4.152   | 1.000     | 3.674  | 9.849     | 99134  |
|          | ANTs B    | 5.163 | 4.570   | 1.000     | 3.873  | 10.817    | 90884  |
|          | ANTs C    | 5.295 | 4.634   | 1.000     | 4.062  | 10.886    | 93564  |
|          | CMTK A    | 4.765 | 4.110   | 1.000     | 3.606  | 9.670     | 102790 |
|          | CMTK B    | 4.783 | 4.211   | 1.000     | 3.606  | 9.849     | 97670  |
|          | CMTK C    | 4.985 | 4.311   | 1.000     | 3.808  | 10.320    | 91042  |
|          | Elastix A | 4.969 | 4.155   | 1.000     | 3.873  | 10.050    | 95666  |
|          | Elastix B | 5.297 | 4.474   | 1.000     | 4.062  | 11.247    | 103016 |
| FCWB     | ANTs A    | 6.747 | 5.686   | 1.225     | 5.099  | 14.595    | 108758 |
|          | ANTs B    | 5.041 | 4.821   | 1.000     | 3.606  | 10.724    | 101844 |
|          | ANTs C    | 5.002 | 4.612   | 1.000     | 3.606  | 10.607    | 115356 |
|          | CMTK A    | 6.305 | 5.135   | 1.581     | 5.000  | 12.669    | 78828  |
|          | CMTK B    | 6.121 | 5.068   | 1.581     | 4.796  | 12.042    | 80406  |
|          | CMTK C    | 5.460 | 4.727   | 1.000     | 4.183  | 11.424    | 108796 |
|          | Elastix A | 6.421 | 5.243   | 1.414     | 4.950  | 14.213    | 100978 |
|          | Elastix B | 7.532 | 5.926   | 1.581     | 5.831  | 16.093    | 108868 |
| Tefor    | ANTs A    | 4.834 | 4.158   | 1.000     | 3.674  | 9.721     | 95462  |
|          | ANTs B    | 5.116 | 4.488   | 1.000     | 3.808  | 10.630    | 96784  |
|          | ANTs C    | 5.534 | 4.552   | 1.414     | 4.359  | 11.068    | 118818 |
|          | CMTK A    | 6.363 | 5.750   | 1.000     | 4.528  | 15.000    | 103720 |
|          | CMTK B    | 6.216 | 5.350   | 1.225     | 4.583  | 13.946    | 103650 |
|          | CMTK C    | 6.192 | 5.002   | 1.414     | 4.743  | 13.134    | 129028 |
|          | Elastix A | 5.393 | 4.360   | 1.000     | 4.243  | 11.247    | 92726  |
|          | Elastix B | 6.594 | 5.233   | 1.225     | 5.196  | 14.213    | 103482 |

**Table S60.** SIP\_L : superior intermediate protocerebrum

| Template | Algorithm | Mean  | Std dev | 10th perc | median | 90th perc | N       |
|----------|-----------|-------|---------|-----------|--------|-----------|---------|
| JFRC2010 | ANTs A    | 4.487 | 4.759   | 0.707     | 2.915  | 10.223    | 2048810 |
|          | ANTs B    | 2.871 | 2.689   | 0.707     | 2.121  | 6.083     | 1844162 |
|          | ANTs C    | 2.884 | 2.818   | 0.707     | 2.121  | 6.124     | 1905962 |
|          | CMTK A    | 3.977 | 4.464   | 0.707     | 2.550  | 8.803     | 1538652 |
|          | CMTK B    | 3.601 | 3.655   | 0.707     | 2.449  | 8.031     | 1604384 |
|          | CMTK C    | 4.044 | 4.257   | 0.707     | 2.646  | 9.220     | 1457268 |
|          | Elastix A | 2.834 | 2.623   | 0.707     | 2.121  | 5.874     | 1698384 |
|          | Elastix B | 3.509 | 3.241   | 0.707     | 2.550  | 7.583     | 1530020 |
| JFRC2013 | ANTs A    | 2.554 | 2.523   | 0.707     | 1.732  | 5.431     | 1978286 |
|          | ANTs B    | 2.862 | 2.798   | 0.707     | 2.121  | 6.083     | 1878714 |
|          | ANTs C    | 2.794 | 2.794   | 0.707     | 2.000  | 6.000     | 1961782 |
|          | CMTK A    | 2.860 | 2.840   | 0.707     | 2.121  | 6.083     | 1808334 |
|          | CMTK B    | 2.973 | 2.895   | 0.707     | 2.121  | 6.403     | 1785804 |
|          | CMTK C    | 3.238 | 2.861   | 0.707     | 2.449  | 6.856     | 1874888 |
|          | Elastix A | 2.726 | 2.593   | 0.707     | 2.121  | 5.568     | 1745092 |
|          | Elastix B | 2.828 | 2.758   | 0.707     | 2.121  | 5.874     | 1788762 |
| JRC2018  | ANTs A    | 2.564 | 2.568   | 0.707     | 1.732  | 5.431     | 1956318 |
|          | ANTs B    | 2.667 | 2.614   | 0.707     | 2.000  | 5.657     | 1819568 |
|          | ANTs C    | 2.638 | 2.641   | 0.707     | 2.000  | 5.568     | 1914416 |
|          | CMTK A    | 2.546 | 2.461   | 0.707     | 2.000  | 5.196     | 1955892 |
|          | CMTK B    | 2.603 | 2.492   | 0.707     | 2.000  | 5.339     | 1883916 |
|          | CMTK C    | 2.674 | 2.576   | 0.707     | 2.000  | 5.568     | 1853804 |
|          | Elastix A | 2.734 | 2.564   | 0.707     | 2.121  | 5.701     | 1798790 |
|          | Elastix B | 2.826 | 2.699   | 0.707     | 2.121  | 5.916     | 1893642 |
| FCWB     | ANTs A    | 2.785 | 2.838   | 0.707     | 2.000  | 6.000     | 1993800 |
|          | ANTs B    | 3.344 | 2.972   | 0.707     | 2.550  | 6.964     | 1546890 |
|          | ANTs C    | 3.265 | 2.969   | 0.707     | 2.449  | 6.856     | 1817190 |
|          | CMTK A    | 3.279 | 3.135   | 0.707     | 2.345  | 7.000     | 1760952 |
|          | CMTK B    | 3.161 | 3.019   | 0.707     | 2.236  | 6.671     | 1789962 |
|          | CMTK C    | 3.238 | 2.987   | 0.707     | 2.345  | 7.000     | 1673578 |
|          | Elastix A | 4.141 | 4.058   | 0.707     | 2.915  | 9.301     | 1638518 |
|          | Elastix B | 3.809 | 3.587   | 0.707     | 2.646  | 8.396     | 1683704 |
| Tefor    | ANTs A    | 2.536 | 2.537   | 0.707     | 1.732  | 5.339     | 1953734 |
|          | ANTs B    | 2.700 | 2.526   | 0.707     | 2.121  | 5.701     | 1875044 |
|          | ANTs C    | 2.757 | 2.620   | 0.707     | 2.121  | 5.831     | 1996512 |
|          | CMTK A    | 3.524 | 3.769   | 0.707     | 2.236  | 7.906     | 1744916 |
|          | CMTK B    | 3.497 | 3.821   | 0.707     | 2.236  | 7.810     | 1736936 |
|          | CMTK C    | 3.086 | 2.971   | 0.707     | 2.236  | 6.557     | 1797932 |
|          | Elastix A | 2.843 | 2.693   | 0.707     | 2.121  | 5.916     | 1789736 |
|          | Elastix B | 3.619 | 3.496   | 0.707     | 2.646  | 7.906     | 1671190 |

**Table S61.** SMP.L : superior medial protocerebrum

| Template | Algorithm | Mean  | Std dev | 10th perc | median | 90th perc | N      |
|----------|-----------|-------|---------|-----------|--------|-----------|--------|
| JFRC2010 | ANTs A    | 7.819 | 6.241   | 1.732     | 5.874  | 17.393    | 698640 |
|          | ANTs B    | 5.936 | 4.431   | 1.581     | 5.000  | 11.511    | 648902 |
|          | ANTs C    | 6.316 | 4.712   | 1.581     | 5.196  | 12.410    | 734882 |
|          | CMTK A    | 6.250 | 4.859   | 1.581     | 5.000  | 12.669    | 858926 |
|          | CMTK B    | 6.124 | 4.779   | 1.581     | 4.950  | 12.369    | 847098 |
|          | CMTK C    | 6.577 | 4.771   | 1.732     | 5.523  | 12.903    | 798272 |
|          | Elastix A | 5.114 | 3.961   | 1.414     | 4.243  | 9.618     | 690276 |
|          | Elastix B | 5.902 | 4.761   | 1.414     | 4.743  | 11.790    | 745100 |
| JFRC2013 | ANTs A    | 4.991 | 3.977   | 1.225     | 4.123  | 9.487     | 712030 |
|          | ANTs B    | 6.906 | 4.970   | 1.732     | 5.745  | 13.583    | 560778 |
|          | ANTs C    | 6.425 | 4.972   | 1.581     | 5.148  | 12.826    | 630090 |
|          | CMTK A    | 5.867 | 4.372   | 1.581     | 4.950  | 11.424    | 667434 |
|          | CMTK B    | 5.962 | 4.403   | 1.581     | 5.000  | 11.597    | 647920 |
|          | CMTK C    | 6.650 | 4.636   | 1.732     | 5.568  | 12.903    | 526864 |
|          | Elastix A | 5.084 | 3.939   | 1.414     | 4.183  | 9.618     | 712258 |
|          | Elastix B | 5.025 | 3.841   | 1.414     | 4.183  | 9.426     | 734544 |
| JRC2018  | ANTs A    | 4.947 | 3.929   | 1.225     | 4.123  | 9.327     | 718986 |
|          | ANTs B    | 5.335 | 4.181   | 1.414     | 4.359  | 10.392    | 698242 |
|          | ANTs C    | 5.566 | 4.273   | 1.581     | 4.528  | 10.724    | 736770 |
|          | CMTK A    | 4.951 | 3.885   | 1.225     | 4.123  | 9.247     | 713194 |
|          | CMTK B    | 4.979 | 3.921   | 1.414     | 4.123  | 9.301     | 698056 |
|          | CMTK C    | 5.165 | 4.006   | 1.414     | 4.301  | 9.721     | 688070 |
|          | Elastix A | 5.034 | 3.953   | 1.414     | 4.123  | 9.487     | 695914 |
|          | Elastix B | 5.117 | 3.971   | 1.414     | 4.243  | 9.670     | 700946 |
| FCWB     | ANTs A    | 5.632 | 4.534   | 1.414     | 4.528  | 11.000    | 675074 |
|          | ANTs B    | 6.545 | 4.684   | 1.732     | 5.523  | 12.826    | 548688 |
|          | ANTs C    | 6.572 | 4.857   | 1.581     | 5.431  | 13.153    | 595164 |
|          | CMTK A    | 6.046 | 4.456   | 1.581     | 5.000  | 11.705    | 656072 |
|          | CMTK B    | 5.884 | 4.447   | 1.581     | 4.950  | 11.380    | 650172 |
|          | CMTK C    | 6.348 | 4.550   | 1.581     | 5.339  | 12.268    | 568660 |
|          | Elastix A | 6.853 | 4.846   | 1.732     | 5.788  | 13.153    | 675556 |
|          | Elastix B | 6.550 | 5.625   | 1.581     | 5.000  | 13.675    | 685246 |
| Tefor    | ANTs A    | 4.977 | 3.939   | 1.225     | 4.123  | 9.407     | 732900 |
|          | ANTs B    | 5.710 | 4.351   | 1.581     | 4.690  | 11.158    | 671192 |
|          | ANTs C    | 6.294 | 4.676   | 1.581     | 5.196  | 12.369    | 718464 |
|          | CMTK A    | 6.738 | 7.063   | 1.414     | 4.637  | 14.509    | 742970 |
|          | CMTK B    | 6.745 | 6.995   | 1.414     | 4.637  | 14.646    | 728246 |
|          | CMTK C    | 6.572 | 5.974   | 1.581     | 5.000  | 13.323    | 669718 |
|          | Elastix A | 5.089 | 3.930   | 1.414     | 4.243  | 9.539     | 714624 |
|          | Elastix B | 6.053 | 4.883   | 1.414     | 4.743  | 12.590    | 781204 |

**Table S62.** AVLP.L : anterior ventrolateral protocerebrum

| Template | Algorithm | Mean  | Std dev | 10th perc | median | 90th perc | N      |
|----------|-----------|-------|---------|-----------|--------|-----------|--------|
| JFRC2010 | ANTs A    | 9.112 | 6.664   | 2.000     | 7.416  | 19.118    | 187494 |
|          | ANTs B    | 6.464 | 4.852   | 1.581     | 5.292  | 12.826    | 147296 |
|          | ANTs C    | 6.652 | 5.096   | 1.581     | 5.523  | 13.000    | 152126 |
|          | CMTK A    | 9.757 | 7.606   | 1.732     | 7.583  | 21.794    | 202130 |
|          | CMTK B    | 9.154 | 7.118   | 1.732     | 7.141  | 19.925    | 197878 |
|          | CMTK C    | 9.658 | 7.309   | 2.121     | 7.517  | 21.071    | 231152 |
|          | Elastix A | 5.831 | 4.685   | 1.414     | 4.528  | 11.874    | 158130 |
|          | Elastix B | 6.175 | 5.039   | 1.414     | 4.743  | 12.767    | 153506 |
| JFRC2013 | ANTs A    | 5.290 | 4.309   | 1.225     | 4.123  | 11.180    | 160822 |
|          | ANTs B    | 6.855 | 5.046   | 1.581     | 5.745  | 13.509    | 146820 |
|          | ANTs C    | 6.684 | 5.161   | 1.581     | 5.385  | 13.583    | 147114 |
|          | CMTK A    | 6.048 | 4.702   | 1.581     | 4.743  | 12.530    | 170840 |
|          | CMTK B    | 6.044 | 4.733   | 1.581     | 4.743  | 12.550    | 167216 |
|          | CMTK C    | 6.499 | 4.795   | 1.581     | 5.339  | 13.019    | 145374 |
|          | Elastix A | 5.297 | 4.297   | 1.225     | 4.123  | 11.136    | 160938 |
|          | Elastix B | 5.363 | 4.330   | 1.225     | 4.183  | 11.180    | 159022 |
| JRC2018  | ANTs A    | 5.322 | 4.354   | 1.225     | 4.123  | 11.180    | 160018 |
|          | ANTs B    | 5.638 | 4.674   | 1.225     | 4.359  | 11.874    | 154582 |
|          | ANTs C    | 5.617 | 4.473   | 1.225     | 4.359  | 11.597    | 157128 |
|          | CMTK A    | 5.481 | 4.422   | 1.225     | 4.183  | 11.597    | 151870 |
|          | CMTK B    | 5.455 | 4.455   | 1.225     | 4.183  | 11.597    | 152622 |
|          | CMTK C    | 5.399 | 4.402   | 1.225     | 4.183  | 11.269    | 155220 |
|          | Elastix A | 5.330 | 4.344   | 1.225     | 4.123  | 11.068    | 159874 |
|          | Elastix B | 5.490 | 4.411   | 1.225     | 4.243  | 11.489    | 153876 |
| FCWB     | ANTs A    | 6.041 | 5.003   | 1.225     | 4.528  | 13.077    | 157390 |
|          | ANTs B    | 7.107 | 5.366   | 1.732     | 5.745  | 14.387    | 156264 |
|          | ANTs C    | 7.099 | 5.517   | 1.581     | 5.701  | 14.283    | 154378 |
|          | CMTK A    | 6.887 | 5.178   | 1.581     | 5.745  | 13.323    | 152632 |
|          | CMTK B    | 6.696 | 5.210   | 1.581     | 5.523  | 13.058    | 151664 |
|          | CMTK C    | 6.804 | 5.184   | 1.581     | 5.431  | 13.894    | 152840 |
|          | Elastix A | 8.175 | 5.608   | 2.121     | 7.000  | 15.764    | 177056 |
|          | Elastix B | 7.828 | 7.120   | 1.581     | 5.701  | 17.088    | 152194 |
| Tefor    | ANTs A    | 5.352 | 4.317   | 1.225     | 4.183  | 11.203    | 158444 |
|          | ANTs B    | 6.163 | 4.734   | 1.581     | 5.000  | 12.288    | 146406 |
|          | ANTs C    | 6.597 | 5.075   | 1.581     | 5.385  | 13.000    | 156388 |
|          | CMTK A    | 7.418 | 6.978   | 1.414     | 5.050  | 17.219    | 148962 |
|          | CMTK B    | 7.391 | 6.916   | 1.414     | 5.050  | 17.176    | 148222 |
|          | CMTK C    | 7.187 | 6.039   | 1.581     | 5.292  | 16.016    | 157190 |
|          | Elastix A | 5.668 | 4.473   | 1.414     | 4.528  | 11.576    | 153402 |
|          | Elastix B | 6.148 | 4.801   | 1.581     | 4.899  | 12.530    | 150086 |

**Table S63.** PVLPL : posterior ventrolateral protocerebrum



| Template | Algorithm | Mean  | Std dev | 10th perc | median | 90th perc | N      |
|----------|-----------|-------|---------|-----------|--------|-----------|--------|
| JFRC2010 | ANTs A    | 6.175 | 4.565   | 1.732     | 5.148  | 11.937    | 195518 |
|          | ANTs B    | 5.508 | 3.674   | 1.732     | 4.796  | 9.644     | 186276 |
|          | ANTs C    | 5.561 | 3.738   | 1.732     | 4.796  | 9.899     | 193810 |
|          | CMTK A    | 5.668 | 3.873   | 1.581     | 4.950  | 10.223    | 191244 |
|          | CMTK B    | 5.393 | 3.709   | 1.581     | 4.743  | 9.327     | 195038 |
|          | CMTK C    | 5.692 | 3.859   | 1.732     | 5.000  | 10.025    | 204724 |
|          | Elastix A | 5.105 | 3.601   | 1.581     | 4.359  | 9.000     | 160224 |
|          | Elastix B | 5.062 | 3.395   | 1.581     | 4.472  | 8.972     | 178084 |
| JFRC2013 | ANTs A    | 5.067 | 3.535   | 1.581     | 4.472  | 8.972     | 170302 |
|          | ANTs B    | 5.353 | 3.430   | 1.732     | 4.743  | 9.274     | 201282 |
|          | ANTs C    | 5.182 | 3.440   | 1.581     | 4.528  | 9.083     | 205812 |
|          | CMTK A    | 5.150 | 3.632   | 1.581     | 4.472  | 9.220     | 173202 |
|          | CMTK B    | 5.095 | 3.597   | 1.581     | 4.359  | 9.110     | 175770 |
|          | CMTK C    | 5.395 | 3.656   | 1.732     | 4.690  | 9.487     | 196884 |
|          | Elastix A | 5.217 | 3.580   | 1.581     | 4.528  | 9.301     | 159198 |
|          | Elastix B | 5.129 | 3.495   | 1.581     | 4.528  | 9.083     | 161826 |
| JRC2018  | ANTs A    | 5.046 | 3.502   | 1.581     | 4.359  | 8.860     | 168292 |
|          | ANTs B    | 5.154 | 3.506   | 1.581     | 4.528  | 9.110     | 176482 |
|          | ANTs C    | 5.174 | 3.407   | 1.581     | 4.528  | 8.972     | 189348 |
|          | CMTK A    | 5.116 | 3.483   | 1.581     | 4.528  | 8.972     | 164240 |
|          | CMTK B    | 5.130 | 3.505   | 1.581     | 4.528  | 9.055     | 161266 |
|          | CMTK C    | 5.164 | 3.544   | 1.581     | 4.528  | 9.192     | 164222 |
|          | Elastix A | 5.095 | 3.511   | 1.581     | 4.472  | 9.000     | 157964 |
|          | Elastix B | 5.048 | 3.458   | 1.581     | 4.359  | 9.000     | 168066 |
| FCWB     | ANTs A    | 5.395 | 3.504   | 1.732     | 4.743  | 9.644     | 175478 |
|          | ANTs B    | 5.711 | 3.834   | 1.732     | 5.000  | 10.223    | 172314 |
|          | ANTs C    | 5.590 | 3.655   | 1.732     | 4.950  | 9.950     | 178622 |
|          | CMTK A    | 5.998 | 4.269   | 1.732     | 5.050  | 11.091    | 199722 |
|          | CMTK B    | 5.737 | 4.156   | 1.732     | 4.950  | 10.198    | 184238 |
|          | CMTK C    | 5.385 | 3.441   | 1.732     | 4.796  | 9.513     | 176718 |
|          | Elastix A | 6.131 | 4.711   | 2.000     | 5.196  | 10.770    | 211960 |
|          | Elastix B | 6.655 | 6.056   | 2.000     | 5.196  | 12.104    | 189138 |
| Tefor    | ANTs A    | 5.009 | 3.438   | 1.581     | 4.472  | 8.718     | 172432 |
|          | ANTs B    | 5.351 | 3.486   | 1.732     | 4.743  | 9.301     | 193554 |
|          | ANTs C    | 5.773 | 3.943   | 1.732     | 5.000  | 10.223    | 199872 |
|          | CMTK A    | 5.981 | 4.548   | 1.581     | 5.000  | 11.269    | 200804 |
|          | CMTK B    | 6.250 | 4.823   | 1.732     | 5.148  | 11.832    | 198428 |
|          | CMTK C    | 5.844 | 3.845   | 2.000     | 5.099  | 10.512    | 201972 |
|          | Elastix A | 5.109 | 3.341   | 1.581     | 4.528  | 8.972     | 163504 |
|          | Elastix B | 5.102 | 3.337   | 1.581     | 4.528  | 9.110     | 196782 |

**Table S64.** IVLP.L : wedge

| Template  | Algorithm | Mean  | Std dev | 10th perc | median | 90th perc | N      |
|-----------|-----------|-------|---------|-----------|--------|-----------|--------|
| JFRC2010  | ANTs A    | 6.063 | 6.078   | 0.707     | 3.808  | 15.067    | 425196 |
|           | ANTs B    | 4.337 | 4.460   | 0.707     | 2.915  | 10.075    | 412812 |
|           | ANTs C    | 4.621 | 4.692   | 0.707     | 3.000  | 10.440    | 373646 |
|           | CMTK A    | 6.856 | 7.376   | 0.707     | 3.606  | 18.111    | 583892 |
|           | CMTK B    | 5.412 | 6.127   | 0.707     | 2.828  | 14.595    | 487112 |
|           | CMTK C    | 7.067 | 6.968   | 0.707     | 4.359  | 17.734    | 485036 |
|           | Elastix A | 3.563 | 4.048   | 0.707     | 2.121  | 8.746     | 427644 |
| Elastix B | 3.517     | 4.245 | 0.707   | 2.000     | 9.000  | 437410    |        |
| JFRC2013  | ANTs A    | 3.314 | 4.099   | 0.707     | 1.732  | 8.093     | 445348 |
|           | ANTs B    | 4.336 | 4.214   | 0.707     | 3.000  | 9.539     | 434152 |
|           | ANTs C    | 4.099 | 4.118   | 0.707     | 2.828  | 9.110     | 446134 |
|           | CMTK A    | 3.938 | 4.224   | 0.707     | 2.550  | 9.110     | 414136 |
|           | CMTK B    | 4.019 | 4.284   | 0.707     | 2.550  | 9.247     | 404460 |
|           | CMTK C    | 4.389 | 4.287   | 0.707     | 3.000  | 9.849     | 405546 |
|           | Elastix A | 3.376 | 4.025   | 0.707     | 2.000  | 8.155     | 428920 |
| Elastix B | 3.304     | 4.045 | 0.707   | 1.732     | 8.031  | 437122    |        |
| JRC2018   | ANTs A    | 3.290 | 4.079   | 0.707     | 1.732  | 8.093     | 455796 |
|           | ANTs B    | 3.428 | 4.028   | 0.707     | 2.121  | 8.124     | 465462 |
|           | ANTs C    | 3.581 | 4.013   | 0.707     | 2.121  | 8.337     | 474688 |
|           | CMTK A    | 3.277 | 4.041   | 0.707     | 1.732  | 8.031     | 446974 |
|           | CMTK B    | 3.242 | 4.028   | 0.707     | 1.732  | 7.906     | 441626 |
|           | CMTK C    | 3.317 | 4.074   | 0.707     | 2.000  | 7.937     | 434284 |
|           | Elastix A | 3.348 | 4.067   | 0.707     | 2.000  | 8.062     | 441954 |
| Elastix B | 3.332     | 4.099 | 0.707   | 1.732     | 8.185  | 444548    |        |
| FCWB      | ANTs A    | 3.598 | 4.510   | 0.707     | 2.000  | 9.055     | 475416 |
|           | ANTs B    | 4.143 | 4.617   | 0.707     | 2.449  | 10.000    | 424340 |
|           | ANTs C    | 4.230 | 4.600   | 0.707     | 2.646  | 9.925     | 420268 |
|           | CMTK A    | 5.873 | 6.766   | 0.707     | 3.536  | 13.964    | 366682 |
|           | CMTK B    | 5.520 | 6.419   | 0.707     | 3.317  | 12.903    | 352618 |
|           | CMTK C    | 4.261 | 4.896   | 0.707     | 2.550  | 10.512    | 398244 |
|           | Elastix A | 6.091 | 5.778   | 1.000     | 4.243  | 13.946    | 338514 |
| Elastix B | 5.045     | 6.085 | 0.707   | 2.345     | 13.656 | 399758    |        |
| Tefor     | ANTs A    | 3.298 | 4.093   | 0.707     | 1.732  | 8.093     | 464996 |
|           | ANTs B    | 3.830 | 4.210   | 0.707     | 2.345  | 8.972     | 452548 |
|           | ANTs C    | 3.920 | 4.255   | 0.707     | 2.449  | 9.055     | 482426 |
|           | CMTK A    | 4.351 | 6.384   | 0.707     | 2.000  | 11.705    | 443760 |
|           | CMTK B    | 4.445 | 6.383   | 0.707     | 2.121  | 12.104    | 442604 |
|           | CMTK C    | 4.642 | 5.547   | 0.707     | 2.646  | 11.402    | 446180 |
|           | Elastix A | 3.475 | 4.037   | 0.707     | 2.121  | 8.515     | 443568 |
| Elastix B | 3.436     | 4.098 | 0.707   | 2.000     | 8.718  | 442816    |        |

**Table S65.** PLP.L : posterior lateral protocerebrum

| Template | Algorithm | Mean   | Std dev | 10th perc | median | 90th perc | N     |
|----------|-----------|--------|---------|-----------|--------|-----------|-------|
| JFRC2010 | ANTs A    | 16.330 | 9.444   | 4.583     | 15.330 | 29.283    | 80554 |
|          | ANTs B    | 8.677  | 7.334   | 1.581     | 6.245  | 19.609    | 14514 |
|          | ANTs C    | 8.930  | 6.973   | 2.000     | 7.000  | 18.788    | 17056 |
|          | CMTK A    | 12.808 | 10.303  | 1.732     | 10.223 | 29.034    | 17914 |
|          | CMTK B    | 13.304 | 10.055  | 2.121     | 11.424 | 28.783    | 22412 |
|          | CMTK C    | 13.049 | 9.556   | 2.550     | 10.817 | 27.295    | 16882 |
|          | Elastix A | 8.749  | 8.171   | 1.581     | 5.568  | 19.929    | 13058 |
|          | Elastix B | 8.253  | 7.852   | 1.414     | 5.196  | 19.925    | 14726 |
| JFRC2013 | ANTs A    | 8.395  | 7.372   | 1.581     | 5.831  | 18.173    | 13596 |
|          | ANTs B    | 8.361  | 6.597   | 1.581     | 6.481  | 18.014    | 31014 |
|          | ANTs C    | 7.389  | 6.613   | 1.225     | 5.196  | 16.872    | 30028 |
|          | CMTK A    | 12.449 | 8.885   | 2.121     | 11.380 | 25.159    | 19976 |
|          | CMTK B    | 12.121 | 8.747   | 2.000     | 10.886 | 24.546    | 20068 |
|          | CMTK C    | 9.563  | 7.412   | 2.121     | 7.550  | 20.591    | 16956 |
|          | Elastix A | 8.655  | 7.742   | 1.581     | 5.874  | 19.248    | 13438 |
|          | Elastix B | 8.887  | 8.003   | 1.581     | 6.083  | 19.975    | 13216 |
| JRC2018  | ANTs A    | 8.895  | 8.129   | 1.581     | 5.788  | 20.906    | 13630 |
|          | ANTs B    | 8.600  | 8.033   | 1.581     | 5.339  | 20.809    | 12338 |
|          | ANTs C    | 8.763  | 7.562   | 1.581     | 6.364  | 19.717    | 14006 |
|          | CMTK A    | 8.795  | 7.937   | 1.581     | 5.874  | 19.962    | 13928 |
|          | CMTK B    | 9.002  | 8.064   | 1.581     | 5.916  | 20.444    | 13452 |
|          | CMTK C    | 8.805  | 7.955   | 1.581     | 5.745  | 20.112    | 12312 |
|          | Elastix A | 8.529  | 7.943   | 1.581     | 5.523  | 19.187    | 13318 |
|          | Elastix B | 8.397  | 7.758   | 1.581     | 5.523  | 19.264    | 14250 |
| FCWB     | ANTs A    | 11.510 | 7.480   | 2.915     | 10.296 | 21.920    | 33530 |
|          | ANTs B    | 6.655  | 7.305   | 1.000     | 3.808  | 17.960    | 15710 |
|          | ANTs C    | 6.117  | 6.348   | 1.000     | 4.123  | 14.560    | 24774 |
|          | CMTK A    | 9.340  | 7.220   | 2.121     | 7.416  | 19.352    | 14154 |
|          | CMTK B    | 9.453  | 7.078   | 2.236     | 7.550  | 19.506    | 14176 |
|          | CMTK C    | 7.192  | 6.623   | 1.225     | 5.050  | 16.643    | 24994 |
|          | Elastix A | 8.935  | 7.286   | 1.581     | 7.000  | 18.577    | 13950 |
|          | Elastix B | 8.916  | 7.954   | 1.581     | 6.364  | 20.106    | 15566 |
| Tefor    | ANTs A    | 8.627  | 7.949   | 1.581     | 5.523  | 20.012    | 14782 |
|          | ANTs B    | 8.462  | 7.386   | 1.581     | 6.042  | 19.153    | 16114 |
|          | ANTs C    | 7.989  | 6.187   | 1.732     | 6.364  | 16.462    | 31686 |
|          | CMTK A    | 11.916 | 8.926   | 1.732     | 10.817 | 24.030    | 18692 |
|          | CMTK B    | 11.288 | 8.859   | 1.732     | 8.860  | 23.675    | 19294 |
|          | CMTK C    | 7.860  | 7.183   | 1.225     | 5.523  | 18.865    | 30052 |
|          | Elastix A | 8.494  | 7.825   | 1.414     | 5.568  | 19.261    | 13916 |
|          | Elastix B | 8.488  | 7.832   | 1.414     | 6.000  | 19.365    | 16528 |

**Table S66.** AOTU.L : anterior optic tubercle

| Template | Algorithm | Mean  | Std dev | 10th perc | median | 90th perc | N      |
|----------|-----------|-------|---------|-----------|--------|-----------|--------|
| JFRC2010 | ANTs A    | 6.263 | 4.807   | 1.581     | 5.000  | 12.669    | 306006 |
|          | ANTs B    | 5.442 | 3.679   | 1.581     | 4.690  | 10.223    | 269522 |
|          | ANTs C    | 5.904 | 4.146   | 1.581     | 5.000  | 11.358    | 304562 |
|          | CMTK A    | 5.675 | 4.171   | 1.414     | 4.690  | 11.336    | 295072 |
|          | CMTK B    | 5.607 | 4.386   | 1.414     | 4.528  | 11.203    | 282530 |
|          | CMTK C    | 6.292 | 4.895   | 1.581     | 5.000  | 12.590    | 258870 |
|          | Elastix A | 4.858 | 3.502   | 1.414     | 4.123  | 9.247     | 286844 |
|          | Elastix B | 4.880 | 3.421   | 1.414     | 4.183  | 9.192     | 305128 |
| JFRC2013 | ANTs A    | 5.114 | 3.581   | 1.581     | 4.359  | 9.618     | 318536 |
|          | ANTs B    | 5.922 | 4.020   | 1.581     | 5.099  | 11.269    | 259806 |
|          | ANTs C    | 6.058 | 4.162   | 1.581     | 5.148  | 11.597    | 314784 |
|          | CMTK A    | 5.545 | 3.978   | 1.581     | 4.528  | 11.045    | 351580 |
|          | CMTK B    | 5.460 | 3.869   | 1.581     | 4.528  | 10.840    | 350916 |
|          | CMTK C    | 5.422 | 4.163   | 1.225     | 4.472  | 11.068    | 340114 |
|          | Elastix A | 5.051 | 3.591   | 1.581     | 4.243  | 9.644     | 283216 |
|          | Elastix B | 4.972 | 3.532   | 1.414     | 4.183  | 9.460     | 322730 |
| JRC2018  | ANTs A    | 4.858 | 3.416   | 1.414     | 4.183  | 9.165     | 327132 |
|          | ANTs B    | 5.205 | 3.477   | 1.581     | 4.528  | 9.644     | 315620 |
|          | ANTs C    | 5.356 | 3.547   | 1.581     | 4.637  | 10.050    | 338732 |
|          | CMTK A    | 4.935 | 3.424   | 1.414     | 4.243  | 9.247     | 326348 |
|          | CMTK B    | 4.890 | 3.416   | 1.414     | 4.183  | 9.192     | 316248 |
|          | CMTK C    | 4.953 | 3.447   | 1.414     | 4.243  | 9.301     | 311878 |
|          | Elastix A | 4.979 | 3.523   | 1.414     | 4.243  | 9.460     | 307772 |
|          | Elastix B | 5.027 | 3.514   | 1.581     | 4.301  | 9.434     | 313066 |
| FCWB     | ANTs A    | 5.352 | 3.653   | 1.581     | 4.583  | 10.050    | 346104 |
|          | ANTs B    | 6.272 | 4.078   | 2.000     | 5.431  | 11.683    | 267224 |
|          | ANTs C    | 6.367 | 4.302   | 1.732     | 5.431  | 12.104    | 293326 |
|          | CMTK A    | 6.098 | 4.049   | 1.732     | 5.196  | 11.597    | 289148 |
|          | CMTK B    | 5.860 | 3.918   | 1.581     | 5.000  | 11.269    | 297822 |
|          | CMTK C    | 6.310 | 4.455   | 1.732     | 5.292  | 12.186    | 278118 |
|          | Elastix A | 6.531 | 4.648   | 1.732     | 5.431  | 12.689    | 276434 |
|          | Elastix B | 6.760 | 5.661   | 1.581     | 5.148  | 13.946    | 303830 |
| Tefor    | ANTs A    | 4.832 | 3.462   | 1.225     | 4.123  | 9.220     | 326606 |
|          | ANTs B    | 5.288 | 3.638   | 1.581     | 4.528  | 9.925     | 301662 |
|          | ANTs C    | 5.553 | 3.919   | 1.581     | 4.743  | 10.512    | 332776 |
|          | CMTK A    | 7.508 | 7.925   | 1.414     | 4.743  | 19.313    | 276804 |
|          | CMTK B    | 7.826 | 8.477   | 1.414     | 4.743  | 21.237    | 266390 |
|          | CMTK C    | 6.622 | 6.748   | 1.581     | 4.690  | 13.342    | 282262 |
|          | Elastix A | 4.994 | 3.577   | 1.414     | 4.243  | 9.513     | 307694 |
|          | Elastix B | 5.162 | 3.549   | 1.581     | 4.472  | 9.747     | 306252 |

**Table S67.** LH\_R : lateral horn

| Template | Algorithm | Mean  | Std dev | 10th perc | median | 90th perc | N     |
|----------|-----------|-------|---------|-----------|--------|-----------|-------|
| JFRC2010 | ANTs A    | 5.602 | 4.184   | 1.414     | 4.528  | 11.424    | 87290 |
|          | ANTs B    | 4.035 | 3.398   | 0.707     | 3.000  | 8.746     | 88176 |
|          | ANTs C    | 4.587 | 3.902   | 0.707     | 3.464  | 10.223    | 72964 |
|          | CMTK A    | 5.297 | 5.320   | 0.707     | 3.240  | 12.903    | 82058 |
|          | CMTK B    | 4.871 | 5.090   | 0.707     | 3.000  | 11.489    | 76474 |
|          | CMTK C    | 4.541 | 4.274   | 0.707     | 3.162  | 10.247    | 72248 |
|          | Elastix A | 3.501 | 2.745   | 0.707     | 2.828  | 7.106     | 81146 |
|          | Elastix B | 3.509 | 2.892   | 0.707     | 2.646  | 7.106     | 82774 |
| JFRC2013 | ANTs A    | 3.289 | 2.510   | 0.707     | 2.646  | 6.708     | 86924 |
|          | ANTs B    | 4.300 | 3.435   | 0.707     | 3.464  | 9.110     | 89722 |
|          | ANTs C    | 4.520 | 3.518   | 1.000     | 3.606  | 9.618     | 86652 |
|          | CMTK A    | 3.375 | 2.802   | 0.707     | 2.646  | 7.106     | 75820 |
|          | CMTK B    | 3.466 | 2.862   | 0.707     | 2.646  | 7.211     | 77116 |
|          | CMTK C    | 4.012 | 3.141   | 1.000     | 3.240  | 7.906     | 89236 |
|          | Elastix A | 3.411 | 2.688   | 0.707     | 2.646  | 7.106     | 78798 |
|          | Elastix B | 3.237 | 2.525   | 0.707     | 2.550  | 6.708     | 78848 |
| JRC2018  | ANTs A    | 3.295 | 2.500   | 0.707     | 2.646  | 6.708     | 87562 |
|          | ANTs B    | 3.520 | 2.700   | 0.707     | 2.915  | 7.141     | 87832 |
|          | ANTs C    | 3.407 | 2.715   | 0.707     | 2.646  | 7.071     | 80968 |
|          | CMTK A    | 3.346 | 2.707   | 0.707     | 2.646  | 7.141     | 71502 |
|          | CMTK B    | 3.344 | 2.685   | 0.707     | 2.646  | 7.106     | 73202 |
|          | CMTK C    | 3.420 | 2.605   | 0.707     | 2.828  | 7.000     | 84368 |
|          | Elastix A | 3.347 | 2.504   | 0.707     | 2.646  | 6.708     | 93686 |
|          | Elastix B | 3.283 | 2.490   | 0.707     | 2.646  | 6.671     | 86832 |
| FCWB     | ANTs A    | 3.230 | 2.593   | 0.707     | 2.550  | 6.708     | 82426 |
|          | ANTs B    | 3.866 | 3.098   | 1.000     | 3.082  | 7.649     | 90258 |
|          | ANTs C    | 3.637 | 2.769   | 1.000     | 2.915  | 7.348     | 90864 |
|          | CMTK A    | 7.472 | 7.195   | 1.225     | 4.690  | 19.609    | 56578 |
|          | CMTK B    | 6.593 | 6.545   | 1.225     | 4.272  | 16.823    | 67432 |
|          | CMTK C    | 3.822 | 3.245   | 0.707     | 2.915  | 8.062     | 88790 |
|          | Elastix A | 9.001 | 8.786   | 1.000     | 5.568  | 24.525    | 75406 |
|          | Elastix B | 4.288 | 3.913   | 0.707     | 3.000  | 9.618     | 92154 |
| Tefor    | ANTs A    | 3.322 | 2.569   | 0.707     | 2.646  | 6.856     | 85508 |
|          | ANTs B    | 3.771 | 2.933   | 0.707     | 3.000  | 7.810     | 87320 |
|          | ANTs C    | 3.747 | 2.940   | 0.707     | 3.000  | 7.842     | 83340 |
|          | CMTK A    | 4.081 | 4.368   | 0.707     | 2.646  | 8.860     | 68066 |
|          | CMTK B    | 4.000 | 4.067   | 0.707     | 2.646  | 8.631     | 69704 |
|          | CMTK C    | 3.973 | 3.401   | 0.707     | 3.000  | 8.093     | 88896 |
|          | Elastix A | 3.337 | 2.629   | 0.707     | 2.646  | 6.745     | 83424 |
|          | Elastix B | 3.740 | 2.994   | 1.000     | 2.915  | 7.906     | 80286 |

**Table S68.** GOR.L : gorget

| Template | Algorithm | Mean  | Std dev | 10th perc | median | 90th perc | N      |
|----------|-----------|-------|---------|-----------|--------|-----------|--------|
| JFRC2010 | ANTs A    | 4.603 | 3.060   | 1.414     | 4.000  | 8.660     | 386392 |
|          | ANTs B    | 5.159 | 3.797   | 1.414     | 4.359  | 9.849     | 282626 |
|          | ANTs C    | 4.697 | 3.345   | 1.225     | 4.062  | 8.972     | 359548 |
|          | CMTK A    | 4.702 | 3.431   | 1.225     | 3.873  | 9.110     | 366014 |
|          | CMTK B    | 4.523 | 3.054   | 1.225     | 3.873  | 8.515     | 386536 |
|          | CMTK C    | 5.126 | 3.609   | 1.414     | 4.359  | 9.874     | 275910 |
|          | Elastix A | 4.364 | 2.937   | 1.225     | 3.808  | 8.155     | 316702 |
|          | Elastix B | 4.167 | 2.732   | 1.225     | 3.606  | 7.810     | 350304 |
| JFRC2013 | ANTs A    | 4.462 | 2.962   | 1.225     | 3.808  | 8.515     | 319094 |
|          | ANTs B    | 4.945 | 3.472   | 1.414     | 4.183  | 9.460     | 322084 |
|          | ANTs C    | 4.926 | 3.366   | 1.414     | 4.183  | 9.434     | 320916 |
|          | CMTK A    | 3.856 | 2.362   | 1.225     | 3.536  | 7.036     | 255508 |
|          | CMTK B    | 4.038 | 2.488   | 1.225     | 3.606  | 7.280     | 250828 |
|          | CMTK C    | 5.119 | 3.194   | 1.581     | 4.528  | 9.539     | 196572 |
|          | Elastix A | 3.841 | 2.367   | 1.000     | 3.464  | 7.106     | 322206 |
|          | Elastix B | 3.630 | 2.278   | 1.000     | 3.162  | 6.708     | 320008 |
| JRC2018  | ANTs A    | 3.620 | 2.362   | 1.000     | 3.082  | 6.856     | 393546 |
|          | ANTs B    | 4.268 | 3.009   | 1.000     | 3.606  | 8.062     | 369874 |
|          | ANTs C    | 4.068 | 2.739   | 1.000     | 3.536  | 7.649     | 394530 |
|          | CMTK A    | 3.851 | 2.473   | 1.000     | 3.317  | 7.280     | 413950 |
|          | CMTK B    | 3.913 | 2.500   | 1.000     | 3.464  | 7.416     | 401238 |
|          | CMTK C    | 4.106 | 2.579   | 1.225     | 3.606  | 7.649     | 382438 |
|          | Elastix A | 4.150 | 2.688   | 1.225     | 3.606  | 7.810     | 376294 |
|          | Elastix B | 3.766 | 2.355   | 1.000     | 3.317  | 7.036     | 382706 |
| FCWB     | ANTs A    | 4.460 | 3.043   | 1.225     | 3.808  | 8.544     | 310260 |
|          | ANTs B    | 5.154 | 3.706   | 1.414     | 4.359  | 9.849     | 250986 |
|          | ANTs C    | 4.784 | 3.468   | 1.225     | 4.062  | 9.220     | 304398 |
|          | CMTK A    | 5.401 | 4.312   | 1.225     | 4.243  | 11.180    | 354154 |
|          | CMTK B    | 5.091 | 3.900   | 1.225     | 4.183  | 10.025    | 353338 |
|          | CMTK C    | 5.454 | 4.031   | 1.414     | 4.528  | 10.700    | 226302 |
|          | Elastix A | 6.715 | 5.527   | 1.225     | 5.000  | 15.116    | 243188 |
|          | Elastix B | 5.876 | 5.514   | 1.225     | 4.183  | 13.058    | 279418 |
| Tefor    | ANTs A    | 3.567 | 2.322   | 1.000     | 3.082  | 6.745     | 390314 |
|          | ANTs B    | 4.780 | 3.532   | 1.225     | 4.062  | 9.083     | 266852 |
|          | ANTs C    | 4.939 | 3.731   | 1.225     | 4.062  | 9.721     | 328196 |
|          | CMTK A    | 5.220 | 5.363   | 1.000     | 3.606  | 10.416    | 352240 |
|          | CMTK B    | 5.390 | 5.499   | 1.225     | 3.808  | 10.863    | 337534 |
|          | CMTK C    | 5.253 | 4.117   | 1.414     | 4.301  | 10.000    | 261764 |
|          | Elastix A | 3.979 | 2.581   | 1.225     | 3.536  | 7.382     | 338726 |
|          | Elastix B | 3.839 | 2.465   | 1.000     | 3.317  | 7.106     | 357760 |

**Table S69.** MB.CA.L : calyx of adult mushroom body

| Template | Algorithm | Mean  | Std dev | 10th perc | median | 90th perc | N      |
|----------|-----------|-------|---------|-----------|--------|-----------|--------|
| JFRC2010 | ANTs A    | 7.310 | 6.162   | 1.581     | 5.431  | 16.279    | 494082 |
|          | ANTs B    | 5.325 | 4.211   | 1.225     | 4.243  | 10.817    | 451332 |
|          | ANTs C    | 5.226 | 3.977   | 1.225     | 4.243  | 10.440    | 481422 |
|          | CMTK A    | 6.758 | 6.100   | 1.225     | 4.690  | 15.556    | 310332 |
|          | CMTK B    | 6.426 | 5.861   | 1.225     | 4.472  | 14.748    | 335610 |
|          | CMTK C    | 6.591 | 6.309   | 1.225     | 4.528  | 15.524    | 465200 |
|          | Elastix A | 4.177 | 3.341   | 1.000     | 3.317  | 8.276     | 430482 |
|          | Elastix B | 4.552 | 3.815   | 1.000     | 3.606  | 9.083     | 358604 |
| JFRC2013 | ANTs A    | 4.277 | 3.570   | 1.000     | 3.240  | 8.775     | 386086 |
|          | ANTs B    | 5.284 | 4.153   | 1.225     | 4.183  | 10.794    | 423082 |
|          | ANTs C    | 5.146 | 4.120   | 1.225     | 4.062  | 10.512    | 413470 |
|          | CMTK A    | 4.507 | 3.717   | 1.000     | 3.536  | 9.055     | 356370 |
|          | CMTK B    | 4.563 | 3.702   | 1.000     | 3.606  | 9.192     | 363436 |
|          | CMTK C    | 5.221 | 4.367   | 1.225     | 4.062  | 10.654    | 425034 |
|          | Elastix A | 4.205 | 3.479   | 1.000     | 3.240  | 8.515     | 390606 |
|          | Elastix B | 4.310 | 3.698   | 1.000     | 3.240  | 8.660     | 360798 |
| JRC2018  | ANTs A    | 4.200 | 3.541   | 1.000     | 3.240  | 8.602     | 390572 |
|          | ANTs B    | 4.684 | 3.780   | 1.000     | 3.606  | 9.539     | 376408 |
|          | ANTs C    | 4.657 | 3.676   | 1.000     | 3.674  | 9.301     | 357000 |
|          | CMTK A    | 4.666 | 3.860   | 1.000     | 3.606  | 9.327     | 330466 |
|          | CMTK B    | 4.576 | 3.824   | 1.000     | 3.606  | 9.247     | 321912 |
|          | CMTK C    | 4.444 | 3.730   | 1.000     | 3.536  | 8.944     | 327862 |
|          | Elastix A | 4.273 | 3.554   | 1.000     | 3.317  | 8.602     | 377022 |
|          | Elastix B | 4.377 | 3.704   | 1.000     | 3.464  | 8.820     | 358098 |
| FCWB     | ANTs A    | 4.690 | 3.962   | 1.000     | 3.606  | 9.618     | 405374 |
|          | ANTs B    | 5.129 | 4.091   | 1.225     | 4.062  | 10.392    | 423360 |
|          | ANTs C    | 4.792 | 3.673   | 1.225     | 3.808  | 9.592     | 415376 |
|          | CMTK A    | 6.758 | 6.919   | 1.414     | 4.637  | 14.646    | 293282 |
|          | CMTK B    | 6.170 | 6.604   | 1.225     | 4.183  | 12.903    | 327190 |
|          | CMTK C    | 5.473 | 5.267   | 1.225     | 3.808  | 11.511    | 374896 |
|          | Elastix A | 6.416 | 5.949   | 1.225     | 4.528  | 14.526    | 435286 |
|          | Elastix B | 5.420 | 5.013   | 1.000     | 3.808  | 12.042    | 451186 |
| Tefor    | ANTs A    | 4.215 | 3.524   | 1.000     | 3.240  | 8.602     | 397556 |
|          | ANTs B    | 4.961 | 4.020   | 1.225     | 3.873  | 10.149    | 424108 |
|          | ANTs C    | 5.222 | 3.927   | 1.414     | 4.301  | 10.271    | 393994 |
|          | CMTK A    | 5.359 | 5.153   | 1.000     | 3.808  | 11.402    | 340272 |
|          | CMTK B    | 5.429 | 5.183   | 1.000     | 3.808  | 11.533    | 340788 |
|          | CMTK C    | 5.132 | 4.455   | 1.225     | 3.873  | 10.607    | 447014 |
|          | Elastix A | 4.159 | 3.403   | 1.000     | 3.240  | 8.155     | 417846 |
|          | Elastix B | 4.672 | 3.709   | 1.225     | 3.674  | 9.220     | 359298 |

Table S70. SPS.L : superior posterior slope

| Template | Algorithm | Mean   | Std dev | 10th perc | median | 90th perc | N      |
|----------|-----------|--------|---------|-----------|--------|-----------|--------|
| JFRC2010 | ANTs A    | 10.205 | 7.498   | 2.550     | 8.485  | 19.875    | 209044 |
|          | ANTs B    | 7.295  | 4.887   | 2.121     | 6.205  | 14.160    | 183132 |
|          | ANTs C    | 7.084  | 4.813   | 2.121     | 6.000  | 13.620    | 193510 |
|          | CMTK A    | 9.097  | 5.863   | 2.345     | 7.937  | 17.734    | 167668 |
|          | CMTK B    | 8.030  | 5.571   | 2.121     | 6.856  | 15.906    | 166860 |
|          | CMTK C    | 8.026  | 5.762   | 2.000     | 6.442  | 16.568    | 213410 |
|          | Elastix A | 6.012  | 4.463   | 1.581     | 5.000  | 12.042    | 192168 |
|          | Elastix B | 6.456  | 4.616   | 1.732     | 5.339  | 12.767    | 192986 |
| JFRC2013 | ANTs A    | 6.601  | 5.144   | 1.581     | 5.196  | 13.874    | 188088 |
|          | ANTs B    | 7.082  | 4.713   | 2.121     | 6.083  | 13.675    | 176902 |
|          | ANTs C    | 7.015  | 4.674   | 2.121     | 5.916  | 13.583    | 186466 |
|          | CMTK A    | 6.739  | 4.972   | 1.581     | 5.568  | 13.342    | 169248 |
|          | CMTK B    | 6.843  | 5.034   | 1.581     | 5.701  | 13.656    | 165164 |
|          | CMTK C    | 7.357  | 4.957   | 2.121     | 6.164  | 14.474    | 189470 |
|          | Elastix A | 6.205  | 4.904   | 1.414     | 4.796  | 13.058    | 181192 |
|          | Elastix B | 6.383  | 4.985   | 1.581     | 5.050  | 13.058    | 180334 |
| JRC2018  | ANTs A    | 6.002  | 4.824   | 1.414     | 4.583  | 12.369    | 185274 |
|          | ANTs B    | 7.113  | 5.055   | 1.732     | 5.916  | 14.071    | 172736 |
|          | ANTs C    | 7.175  | 4.979   | 2.000     | 6.042  | 14.089    | 171534 |
|          | CMTK A    | 6.512  | 4.920   | 1.581     | 5.196  | 13.285    | 167674 |
|          | CMTK B    | 6.583  | 4.995   | 1.581     | 5.339  | 13.416    | 161066 |
|          | CMTK C    | 6.903  | 5.237   | 1.581     | 5.568  | 14.053    | 158340 |
|          | Elastix A | 6.178  | 4.929   | 1.414     | 4.796  | 12.806    | 184982 |
|          | Elastix B | 6.339  | 4.904   | 1.581     | 5.050  | 13.019    | 176462 |
| FCWB     | ANTs A    | 6.598  | 4.791   | 1.581     | 5.431  | 13.435    | 197364 |
|          | ANTs B    | 6.999  | 4.749   | 2.000     | 6.042  | 13.304    | 162610 |
|          | ANTs C    | 6.932  | 4.802   | 2.000     | 5.874  | 13.435    | 157050 |
|          | CMTK A    | 9.012  | 6.139   | 2.236     | 7.778  | 17.607    | 247140 |
|          | CMTK B    | 8.812  | 6.140   | 2.236     | 7.416  | 17.364    | 216198 |
|          | CMTK C    | 7.849  | 5.540   | 2.000     | 6.442  | 16.016    | 189734 |
|          | Elastix A | 8.489  | 6.017   | 2.121     | 7.106  | 16.643    | 272580 |
|          | Elastix B | 8.059  | 6.710   | 1.581     | 6.205  | 16.778    | 286162 |
| Tefor    | ANTs A    | 6.097  | 4.774   | 1.414     | 4.796  | 12.669    | 184588 |
|          | ANTs B    | 7.181  | 4.730   | 2.121     | 6.205  | 13.820    | 185350 |
|          | ANTs C    | 7.416  | 4.873   | 2.236     | 6.364  | 14.248    | 173904 |
|          | CMTK A    | 7.824  | 5.968   | 1.732     | 6.364  | 16.000    | 207344 |
|          | CMTK B    | 8.036  | 6.168   | 1.732     | 6.481  | 16.583    | 199956 |
|          | CMTK C    | 7.281  | 5.378   | 1.732     | 6.083  | 14.248    | 219074 |
|          | Elastix A | 5.726  | 4.444   | 1.414     | 4.528  | 11.597    | 200776 |
|          | Elastix B | 6.505  | 4.685   | 1.581     | 5.385  | 12.767    | 197976 |

**Table S71.** IPS.L : inferior posterior slope



| Template | Algorithm | Mean  | Std dev | 10th perc | median | 90th perc | N      |
|----------|-----------|-------|---------|-----------|--------|-----------|--------|
| JFRC2010 | ANTs A    | 5.455 | 6.304   | 0.707     | 3.162  | 13.285    | 365908 |
|          | ANTs B    | 3.064 | 3.233   | 0.707     | 2.000  | 7.314     | 310344 |
|          | ANTs C    | 3.262 | 3.507   | 0.707     | 2.000  | 8.062     | 287574 |
|          | CMTK A    | 3.271 | 4.042   | 0.707     | 1.732  | 8.660     | 316734 |
|          | CMTK B    | 4.493 | 5.100   | 0.707     | 2.236  | 12.288    | 378216 |
|          | CMTK C    | 4.372 | 4.872   | 0.707     | 2.345  | 11.597    | 354038 |
|          | Elastix A | 2.718 | 2.975   | 0.707     | 1.581  | 6.403     | 313594 |
|          | Elastix B | 2.957 | 3.658   | 0.707     | 1.581  | 7.036     | 302568 |
| JFRC2013 | ANTs A    | 2.501 | 2.654   | 0.707     | 1.581  | 5.831     | 330144 |
|          | ANTs B    | 3.351 | 3.483   | 0.707     | 2.121  | 8.124     | 306500 |
|          | ANTs C    | 3.029 | 3.191   | 0.707     | 1.732  | 7.246     | 325802 |
|          | CMTK A    | 3.161 | 2.930   | 0.707     | 2.236  | 6.964     | 308818 |
|          | CMTK B    | 3.173 | 2.976   | 0.707     | 2.236  | 7.000     | 309956 |
|          | CMTK C    | 3.734 | 3.275   | 0.707     | 2.828  | 7.937     | 296110 |
|          | Elastix A | 2.585 | 2.750   | 0.707     | 1.581  | 6.083     | 327732 |
|          | Elastix B | 2.587 | 2.758   | 0.707     | 1.581  | 6.083     | 324458 |
| JRC2018  | ANTs A    | 2.486 | 2.641   | 0.707     | 1.581  | 5.788     | 333308 |
|          | ANTs B    | 2.673 | 2.819   | 0.707     | 1.581  | 6.364     | 328600 |
|          | ANTs C    | 2.700 | 2.774   | 0.707     | 1.732  | 6.403     | 328444 |
|          | CMTK A    | 2.446 | 2.604   | 0.707     | 1.581  | 5.701     | 326512 |
|          | CMTK B    | 2.434 | 2.604   | 0.707     | 1.581  | 5.701     | 326858 |
|          | CMTK C    | 2.493 | 2.660   | 0.707     | 1.581  | 5.745     | 323692 |
|          | Elastix A | 2.561 | 2.688   | 0.707     | 1.581  | 5.916     | 328392 |
|          | Elastix B | 2.569 | 2.845   | 0.707     | 1.581  | 6.083     | 332010 |
| FCWB     | ANTs A    | 3.331 | 3.599   | 0.707     | 2.000  | 8.185     | 319986 |
|          | ANTs B    | 3.417 | 3.764   | 0.707     | 2.121  | 8.337     | 291926 |
|          | ANTs C    | 3.354 | 3.612   | 0.707     | 2.121  | 8.246     | 304426 |
|          | CMTK A    | 3.989 | 4.814   | 0.707     | 2.236  | 9.849     | 252984 |
|          | CMTK B    | 3.966 | 4.561   | 0.707     | 2.345  | 9.618     | 258242 |
|          | CMTK C    | 3.019 | 3.575   | 0.707     | 1.732  | 7.106     | 311560 |
|          | Elastix A | 4.944 | 5.453   | 0.707     | 2.915  | 12.530    | 261840 |
|          | Elastix B | 3.853 | 5.500   | 0.707     | 1.732  | 9.721     | 278840 |
| Tefor    | ANTs A    | 2.467 | 2.608   | 0.707     | 1.581  | 5.745     | 332778 |
|          | ANTs B    | 2.821 | 2.956   | 0.707     | 1.732  | 6.671     | 318136 |
|          | ANTs C    | 3.077 | 3.168   | 0.707     | 2.000  | 7.246     | 337976 |
|          | CMTK A    | 2.942 | 4.012   | 0.707     | 1.581  | 6.964     | 320210 |
|          | CMTK B    | 2.960 | 4.025   | 0.707     | 1.581  | 7.000     | 317748 |
|          | CMTK C    | 3.010 | 3.521   | 0.707     | 1.732  | 6.856     | 323594 |
|          | Elastix A | 2.625 | 2.881   | 0.707     | 1.581  | 6.124     | 316456 |
|          | Elastix B | 3.013 | 3.655   | 0.707     | 1.732  | 7.246     | 297784 |

**Table S72.** SCL.L : superior clamp

| Template | Algorithm | Mean   | Std dev | 10th perc | median | 90th perc | N     |
|----------|-----------|--------|---------|-----------|--------|-----------|-------|
| JFRC2010 | ANTs A    | 8.473  | 6.129   | 1.732     | 6.856  | 17.264    | 20800 |
|          | ANTs B    | 9.971  | 8.119   | 1.732     | 7.649  | 23.592    | 5310  |
|          | ANTs C    | 13.086 | 9.894   | 2.646     | 10.025 | 28.267    | 5350  |
|          | CMTK A    | 8.004  | 7.301   | 1.225     | 4.743  | 19.416    | 7936  |
|          | CMTK B    | 8.871  | 7.742   | 1.414     | 5.701  | 20.541    | 8882  |
|          | CMTK C    | 14.072 | 8.653   | 3.162     | 13.229 | 26.086    | 8348  |
|          | Elastix A | 5.027  | 3.985   | 1.000     | 3.873  | 11.091    | 8620  |
|          | Elastix B | 6.502  | 5.606   | 1.225     | 4.528  | 14.782    | 11278 |
| JFRC2013 | ANTs A    | 4.772  | 3.640   | 1.000     | 3.674  | 9.925     | 11272 |
|          | ANTs B    | 9.053  | 6.853   | 2.345     | 6.856  | 19.912    | 8706  |
|          | ANTs C    | 9.880  | 7.181   | 2.121     | 7.842  | 20.628    | 8176  |
|          | CMTK A    | 4.652  | 3.545   | 1.000     | 3.606  | 9.849     | 7850  |
|          | CMTK B    | 4.737  | 3.664   | 1.000     | 3.674  | 9.849     | 7898  |
|          | CMTK C    | 5.578  | 5.375   | 1.000     | 3.808  | 11.864    | 8396  |
|          | Elastix A | 4.517  | 3.482   | 1.000     | 3.536  | 9.327     | 11440 |
|          | Elastix B | 4.331  | 3.306   | 1.000     | 3.536  | 8.746     | 10200 |
| JRC2018  | ANTs A    | 4.715  | 3.604   | 1.000     | 3.674  | 9.872     | 11212 |
|          | ANTs B    | 5.370  | 4.386   | 1.000     | 4.123  | 11.597    | 10352 |
|          | ANTs C    | 6.863  | 5.464   | 1.581     | 5.431  | 12.923    | 9650  |
|          | CMTK A    | 4.177  | 3.202   | 1.000     | 3.240  | 9.000     | 7242  |
|          | CMTK B    | 4.271  | 3.175   | 1.000     | 3.464  | 8.964     | 8104  |
|          | CMTK C    | 4.366  | 3.299   | 1.000     | 3.536  | 8.972     | 9412  |
|          | Elastix A | 4.523  | 3.391   | 1.000     | 3.606  | 9.083     | 10326 |
|          | Elastix B | 4.229  | 3.177   | 1.000     | 3.536  | 8.515     | 9400  |
| FCWB     | ANTs A    | 5.231  | 4.080   | 1.225     | 4.123  | 11.203    | 10960 |
|          | ANTs B    | 6.989  | 5.387   | 1.732     | 5.523  | 14.232    | 11730 |
|          | ANTs C    | 7.271  | 6.425   | 1.581     | 5.000  | 17.116    | 10192 |
|          | CMTK A    | 6.679  | 6.664   | 1.581     | 4.528  | 14.179    | 5850  |
|          | CMTK B    | 7.742  | 6.833   | 1.732     | 5.745  | 16.233    | 7096  |
|          | CMTK C    | 5.272  | 5.928   | 1.000     | 3.536  | 10.392    | 7818  |
|          | Elastix A | 12.588 | 6.992   | 2.646     | 13.304 | 21.389    | 11342 |
|          | Elastix B | 10.268 | 6.293   | 2.121     | 9.874  | 18.557    | 14104 |
| Tefor    | ANTs A    | 4.496  | 3.439   | 1.000     | 3.536  | 9.434     | 10886 |
|          | ANTs B    | 7.671  | 6.469   | 1.581     | 5.523  | 17.769    | 8006  |
|          | ANTs C    | 8.403  | 7.111   | 1.581     | 5.874  | 19.313    | 6976  |
|          | CMTK A    | 5.387  | 6.922   | 1.000     | 3.000  | 11.402    | 5952  |
|          | CMTK B    | 5.379  | 6.771   | 1.000     | 3.162  | 11.834    | 6314  |
|          | CMTK C    | 7.147  | 6.188   | 1.414     | 5.523  | 15.484    | 10986 |
|          | Elastix A | 4.854  | 4.112   | 1.000     | 3.606  | 9.925     | 8444  |
|          | Elastix B | 6.968  | 5.819   | 1.581     | 5.148  | 15.133    | 10642 |

**Table S73.** EPA.L : epalette

| Template | Algorithm | Mean  | Std dev | 10th perc | median | 90th perc | N    |
|----------|-----------|-------|---------|-----------|--------|-----------|------|
| JFRC2010 | ANTs A    | 9.792 | 6.880   | 2.915     | 8.276  | 19.300    | 6906 |
|          | ANTs B    | 7.664 | 3.981   | 2.646     | 7.141  | 13.304    | 5612 |
|          | ANTs C    | 8.216 | 4.275   | 3.000     | 7.665  | 14.027    | 6166 |
|          | CMTK A    | 8.411 | 4.059   | 3.082     | 8.276  | 13.675    | 4720 |
|          | CMTK B    | 8.171 | 4.245   | 2.540     | 7.842  | 13.946    | 7860 |
|          | CMTK C    | 8.291 | 4.460   | 2.646     | 8.031  | 14.370    | 7384 |
|          | Elastix A | 7.822 | 4.291   | 2.236     | 7.348  | 14.053    | 5158 |
|          | Elastix B | 7.306 | 3.983   | 2.121     | 7.036  | 12.669    | 4932 |
| JFRC2013 | ANTs A    | 7.327 | 3.693   | 2.646     | 7.000  | 12.510    | 4904 |
|          | ANTs B    | 8.966 | 4.455   | 3.464     | 8.544  | 15.149    | 3702 |
|          | ANTs C    | 7.549 | 4.321   | 2.121     | 7.071  | 13.952    | 3488 |
|          | CMTK A    | 8.723 | 4.345   | 3.162     | 8.515  | 14.474    | 5628 |
|          | CMTK B    | 8.507 | 4.346   | 3.000     | 8.155  | 14.474    | 6310 |
|          | CMTK C    | 8.175 | 4.181   | 3.162     | 7.416  | 13.964    | 4600 |
|          | Elastix A | 8.221 | 3.821   | 3.240     | 8.062  | 13.435    | 4282 |
|          | Elastix B | 7.716 | 4.024   | 2.550     | 7.314  | 13.388    | 5236 |
| JRC2018  | ANTs A    | 7.185 | 3.763   | 2.345     | 6.708  | 12.530    | 5298 |
|          | ANTs B    | 7.432 | 3.864   | 2.449     | 7.106  | 12.826    | 5168 |
|          | ANTs C    | 7.357 | 3.788   | 2.646     | 6.856  | 12.708    | 6022 |
|          | CMTK A    | 7.320 | 3.819   | 2.550     | 6.856  | 12.767    | 4962 |
|          | CMTK B    | 7.285 | 3.863   | 2.345     | 6.856  | 12.927    | 4570 |
|          | CMTK C    | 7.396 | 4.024   | 2.236     | 7.106  | 13.077    | 5154 |
|          | Elastix A | 7.352 | 3.767   | 2.345     | 7.141  | 12.530    | 5522 |
|          | Elastix B | 7.662 | 4.076   | 2.345     | 7.246  | 13.416    | 4790 |
| FCWB     | ANTs A    | 7.724 | 3.923   | 2.646     | 7.382  | 13.153    | 4658 |
|          | ANTs B    | 7.151 | 4.437   | 2.000     | 6.481  | 13.058    | 5524 |
|          | ANTs C    | 7.915 | 3.768   | 3.240     | 7.649  | 13.058    | 5910 |
|          | CMTK A    | 7.525 | 3.861   | 2.646     | 7.211  | 13.088    | 5108 |
|          | CMTK B    | 7.678 | 3.944   | 2.915     | 7.246  | 13.416    | 4854 |
|          | CMTK C    | 8.755 | 3.762   | 4.183     | 8.276  | 14.230    | 3826 |
|          | Elastix A | 8.976 | 4.336   | 3.606     | 8.544  | 14.612    | 5108 |
|          | Elastix B | 7.824 | 3.881   | 2.646     | 7.616  | 13.077    | 5912 |
| Tefor    | ANTs A    | 7.285 | 3.799   | 2.449     | 6.856  | 12.765    | 5312 |
|          | ANTs B    | 7.383 | 3.776   | 2.737     | 7.000  | 12.610    | 5956 |
|          | ANTs C    | 8.357 | 4.225   | 3.041     | 8.031  | 13.964    | 6816 |
|          | CMTK A    | 8.646 | 4.419   | 3.082     | 8.185  | 14.577    | 4492 |
|          | CMTK B    | 9.250 | 4.824   | 3.162     | 9.301  | 15.182    | 3766 |
|          | CMTK C    | 9.734 | 4.802   | 3.536     | 9.301  | 16.553    | 4354 |
|          | Elastix A | 7.722 | 4.249   | 2.000     | 7.416  | 13.583    | 4586 |
|          | Elastix B | 7.232 | 3.787   | 2.345     | 7.036  | 12.300    | 5808 |

Table S74. GA.L : gall

| Template  | Algorithm | Mean   | Std dev | 10th perc | median | 90th perc | N      |
|-----------|-----------|--------|---------|-----------|--------|-----------|--------|
| JFRC2010  | ANTs A    | 11.570 | 7.574   | 2.345     | 10.464 | 22.113    | 176308 |
|           | ANTs B    | 5.994  | 5.228   | 1.414     | 4.528  | 12.767    | 53780  |
|           | ANTs C    | 6.006  | 5.241   | 1.414     | 4.528  | 12.669    | 48400  |
|           | CMTK A    | 9.958  | 6.654   | 2.345     | 8.660  | 19.672    | 95702  |
|           | CMTK B    | 10.801 | 7.191   | 2.345     | 9.539  | 21.378    | 84010  |
|           | CMTK C    | 8.467  | 5.685   | 2.121     | 7.246  | 16.748    | 102936 |
|           | Elastix A | 6.023  | 5.398   | 1.414     | 4.528  | 12.689    | 48958  |
| Elastix B | 6.049     | 4.992  | 1.414   | 4.743     | 12.042 | 56630     |        |
| JFRC2013  | ANTs A    | 4.988  | 5.337   | 1.000     | 3.162  | 11.790    | 47072  |
|           | ANTs B    | 5.080  | 3.931   | 1.414     | 4.000  | 10.320    | 158968 |
|           | ANTs C    | 5.849  | 4.347   | 1.581     | 4.690  | 11.705    | 130506 |
|           | CMTK A    | 6.402  | 5.851   | 1.414     | 4.528  | 14.018    | 37398  |
|           | CMTK B    | 6.525  | 5.589   | 1.581     | 4.950  | 13.435    | 41744  |
|           | CMTK C    | 6.529  | 4.821   | 1.732     | 5.292  | 12.923    | 82804  |
|           | Elastix A | 5.209  | 5.190   | 1.000     | 3.606  | 11.597    | 51690  |
| Elastix B | 5.227     | 5.188  | 1.000   | 3.606     | 11.597 | 50770     |        |
| JRC2018   | ANTs A    | 5.152  | 5.552   | 1.000     | 3.240  | 12.186    | 46336  |
|           | ANTs B    | 5.764  | 4.816   | 1.225     | 4.528  | 11.604    | 53168  |
|           | ANTs C    | 5.795  | 4.116   | 1.581     | 4.950  | 10.724    | 75474  |
|           | CMTK A    | 5.810  | 5.894   | 1.000     | 3.808  | 13.730    | 33196  |
|           | CMTK B    | 5.847  | 5.896   | 1.000     | 3.873  | 13.739    | 32616  |
|           | CMTK C    | 5.934  | 5.925   | 1.225     | 4.062  | 13.647    | 35616  |
|           | Elastix A | 5.765  | 5.560   | 1.000     | 4.062  | 13.058    | 41278  |
| Elastix B | 5.981     | 5.689  | 1.225   | 4.123     | 13.675 | 37368     |        |
| FCWB      | ANTs A    | 6.636  | 5.688   | 1.225     | 4.796  | 14.916    | 50220  |
|           | ANTs B    | 5.839  | 4.106   | 1.581     | 4.899  | 11.402    | 133492 |
|           | ANTs C    | 6.722  | 4.678   | 1.732     | 5.701  | 13.285    | 105324 |
|           | CMTK A    | 10.190 | 6.568   | 2.345     | 9.192  | 19.975    | 113524 |
|           | CMTK B    | 9.805  | 6.403   | 2.345     | 8.602  | 18.947    | 71940  |
|           | CMTK C    | 7.424  | 5.566   | 1.732     | 6.000  | 15.572    | 74432  |
|           | Elastix A | 9.369  | 6.192   | 2.236     | 8.246  | 18.453    | 186822 |
| Elastix B | 11.057    | 7.018  | 2.449   | 10.149    | 21.225 | 128624    |        |
| Tefor     | ANTs A    | 5.094  | 5.423   | 1.000     | 3.317  | 12.042    | 46480  |
|           | ANTs B    | 5.715  | 4.603   | 1.414     | 4.528  | 11.790    | 46570  |
|           | ANTs C    | 7.075  | 5.221   | 1.732     | 5.701  | 13.874    | 61358  |
|           | CMTK A    | 10.621 | 6.530   | 2.550     | 9.849  | 19.698    | 80892  |
|           | CMTK B    | 10.684 | 6.664   | 2.550     | 9.823  | 19.975    | 77374  |
|           | CMTK C    | 10.544 | 7.218   | 2.236     | 9.301  | 20.881    | 81748  |
|           | Elastix A | 6.861  | 5.579   | 1.581     | 5.431  | 14.177    | 41516  |
| Elastix B | 8.750     | 5.938  | 2.121   | 7.416     | 17.507 | 103946    |        |

**Table S75.** LAL\_R : lateral accessory lobe

| Template | Algorithm | Mean  | Std dev | 10th perc | median | 90th perc | N      |
|----------|-----------|-------|---------|-----------|--------|-----------|--------|
| JFRC2010 | ANTs A    | 5.974 | 5.347   | 1.581     | 4.528  | 11.619    | 815870 |
|          | ANTs B    | 4.852 | 3.709   | 1.581     | 4.123  | 8.631     | 856040 |
|          | ANTs C    | 4.952 | 3.894   | 1.581     | 4.183  | 8.860     | 901644 |
|          | CMTK A    | 5.157 | 4.126   | 1.581     | 4.183  | 9.618     | 867552 |
|          | CMTK B    | 5.005 | 3.960   | 1.581     | 4.123  | 9.165     | 846594 |
|          | CMTK C    | 5.125 | 4.054   | 1.581     | 4.243  | 9.192     | 846840 |
|          | Elastix A | 4.538 | 3.565   | 1.414     | 3.808  | 8.185     | 750648 |
|          | Elastix B | 4.755 | 3.790   | 1.414     | 4.000  | 8.573     | 723218 |
| JFRC2013 | ANTs A    | 4.608 | 3.762   | 1.225     | 3.808  | 8.515     | 796100 |
|          | ANTs B    | 5.149 | 4.085   | 1.581     | 4.359  | 9.192     | 790572 |
|          | ANTs C    | 5.098 | 4.178   | 1.581     | 4.243  | 9.192     | 820998 |
|          | CMTK A    | 4.904 | 3.861   | 1.414     | 4.123  | 9.055     | 746112 |
|          | CMTK B    | 4.907 | 3.813   | 1.414     | 4.123  | 9.000     | 741396 |
|          | CMTK C    | 5.122 | 3.787   | 1.581     | 4.359  | 9.247     | 766278 |
|          | Elastix A | 4.569 | 3.627   | 1.225     | 3.808  | 8.307     | 717052 |
|          | Elastix B | 4.614 | 3.717   | 1.225     | 3.808  | 8.396     | 734362 |
| JRC2018  | ANTs A    | 4.567 | 3.849   | 1.225     | 3.808  | 8.276     | 757694 |
|          | ANTs B    | 4.892 | 3.770   | 1.581     | 4.123  | 8.775     | 783234 |
|          | ANTs C    | 5.052 | 3.894   | 1.581     | 4.243  | 9.083     | 815800 |
|          | CMTK A    | 4.598 | 3.879   | 1.225     | 3.808  | 8.396     | 751242 |
|          | CMTK B    | 4.568 | 3.770   | 1.225     | 3.808  | 8.367     | 739994 |
|          | CMTK C    | 4.631 | 3.699   | 1.414     | 3.808  | 8.396     | 733568 |
|          | Elastix A | 4.553 | 3.665   | 1.225     | 3.808  | 8.276     | 720306 |
|          | Elastix B | 4.719 | 3.895   | 1.414     | 3.873  | 8.544     | 725992 |
| FCWB     | ANTs A    | 4.685 | 3.689   | 1.225     | 3.873  | 8.544     | 751334 |
|          | ANTs B    | 4.765 | 3.932   | 1.414     | 4.000  | 8.544     | 846026 |
|          | ANTs C    | 4.749 | 3.804   | 1.414     | 4.000  | 8.515     | 855024 |
|          | CMTK A    | 5.086 | 3.868   | 1.581     | 4.301  | 9.165     | 831892 |
|          | CMTK B    | 4.993 | 3.845   | 1.581     | 4.243  | 8.972     | 819294 |
|          | CMTK C    | 4.922 | 3.642   | 1.581     | 4.183  | 8.746     | 781292 |
|          | Elastix A | 5.654 | 5.084   | 1.581     | 4.583  | 10.100    | 802456 |
|          | Elastix B | 5.328 | 4.575   | 1.581     | 4.472  | 9.618     | 872146 |
| Tefor    | ANTs A    | 4.574 | 3.664   | 1.225     | 3.808  | 8.276     | 756640 |
|          | ANTs B    | 5.023 | 3.748   | 1.581     | 4.301  | 9.000     | 811812 |
|          | ANTs C    | 5.192 | 3.922   | 1.581     | 4.359  | 9.407     | 828668 |
|          | CMTK A    | 5.294 | 4.177   | 1.414     | 4.359  | 10.075    | 769982 |
|          | CMTK B    | 5.270 | 4.061   | 1.414     | 4.359  | 10.075    | 761656 |
|          | CMTK C    | 5.243 | 4.073   | 1.581     | 4.359  | 9.460     | 783740 |
|          | Elastix A | 4.763 | 3.676   | 1.414     | 4.062  | 8.544     | 710380 |
|          | Elastix B | 5.181 | 3.827   | 1.581     | 4.472  | 9.407     | 750662 |

**Table S76.** SAD : saddle

## 2 Qualitative registration results

Finally, we present a more thorough qualitative comparison of registration results. We first randomly selected two of our evaluation images, then display three z-slices of those nc82 images after registration to a particular template, using a particular algorithm. This is repeated for every template-algorithm pair, with the same two moving images. The z-slices were chosen to show similar anatomical structures, and therefore vary across templates.

Arrows were placed once on each template image at similar (but not identical) locations, and are displayed at the same location in each warped image. Similar anatomical structure around each arrow for both images indicates that registration is consistent from image to image. These anatomical structures include the: mushroom body, ellipsoid body, lateral horn, protocerebral bridge, and the anterior optic tubercle. Large differences in structure at the same location in the two aligned images is an indication of poor registration accuracy, but good apparent alignment could still result from inadequate registration. See the discussion limitations of using manually chosen landmark points in Sections 4.2.1 and 5.1.

Despite the limitations of this qualitative assessment, we will briefly point out some observations given the examples below. For the CMTK registrations using JRC 2018F, the ellipsoid body appears overly deformed using CMTK A (Fig. S4) and CMTK C (Fig. S5), but not CMTK B (Fig. S5). This is consistent with the JSD. Some registrations produced unusable results, with significant scaling issues, see Tefor-CMTK B (Fig. S37). Over-warping is evident using ANTs C, for example, with JFRC 2013 (Fig. S19). Surprisingly, some elastix transformations over-warp as well despite generally low-values of JSD, for example JFRC 2010 and Elastix A (Fig. S31). It could be that elastix does not over-warp on average, but happened to produce a poor result for one of the images randomly selected here.

In general, there exists an algorithm that works well for every template. Overall, registration quality seems most consistent when using the JRC 2018 template.

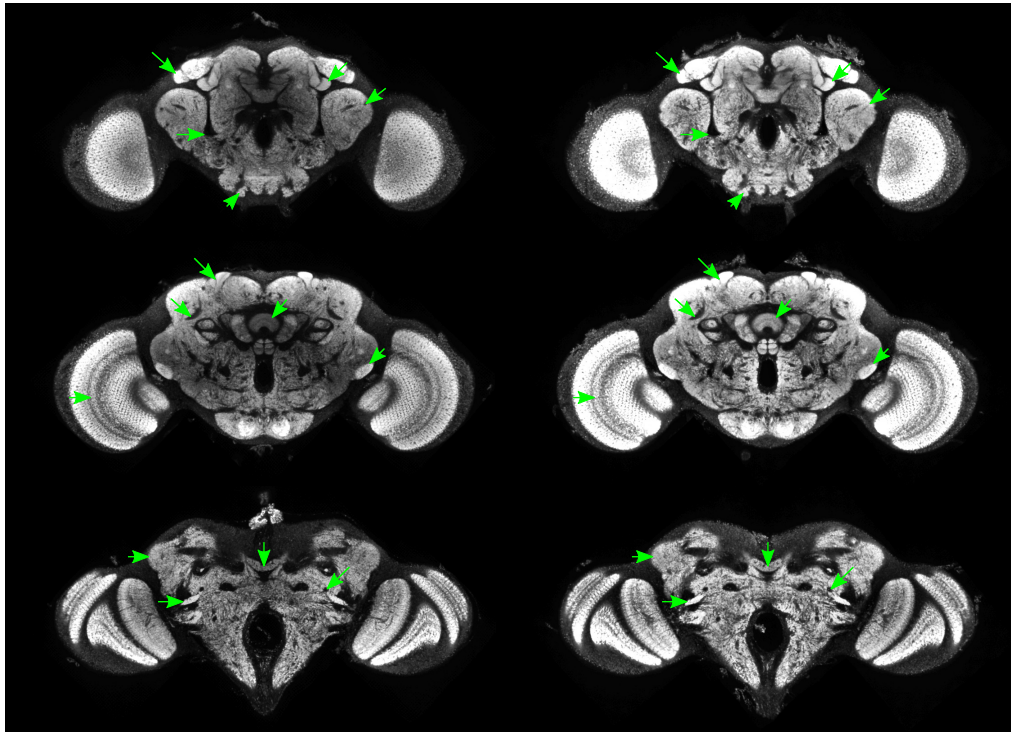

Fig S1. JRC2018 antsA

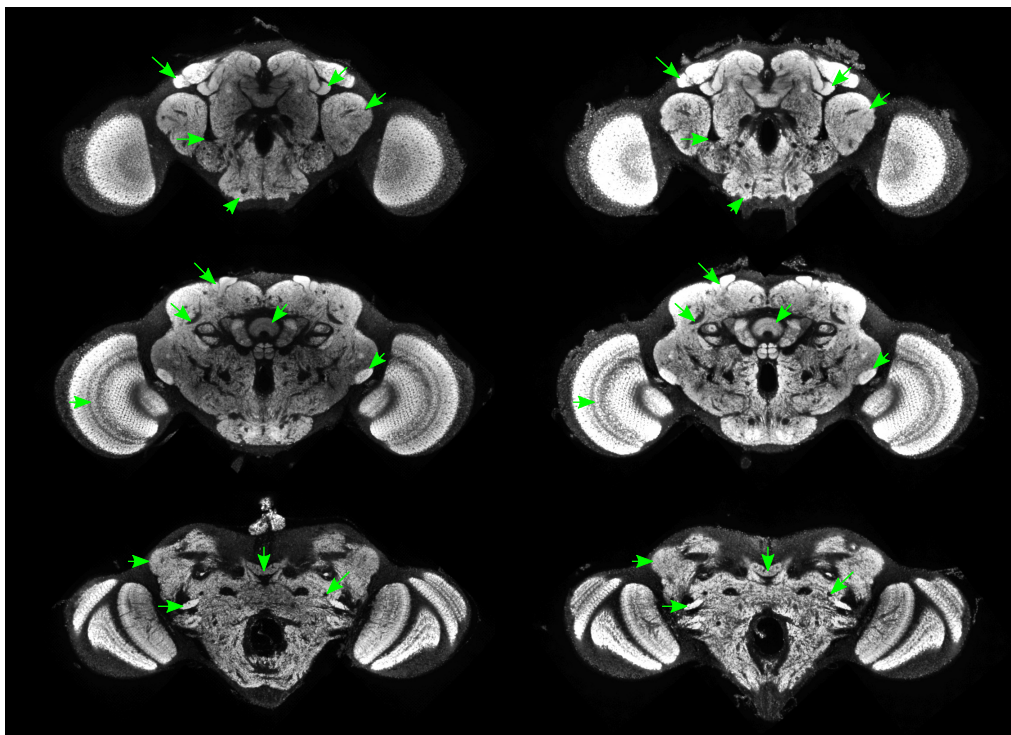

Fig S2. JRC2018 antsB

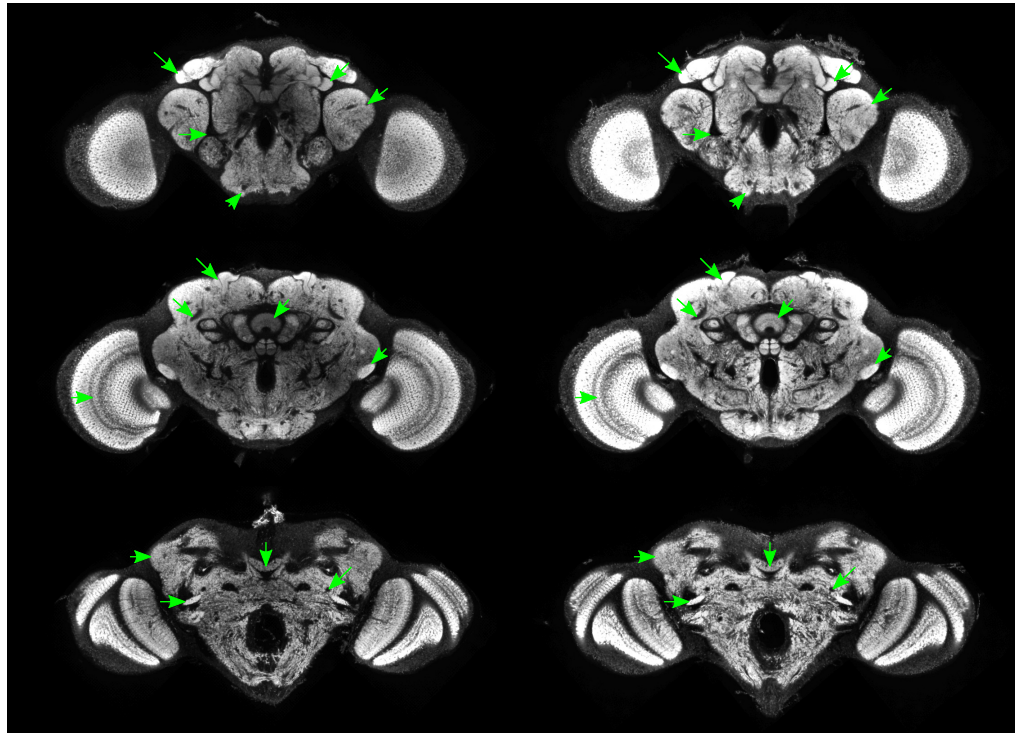

Fig S3. JRC2018 antsC

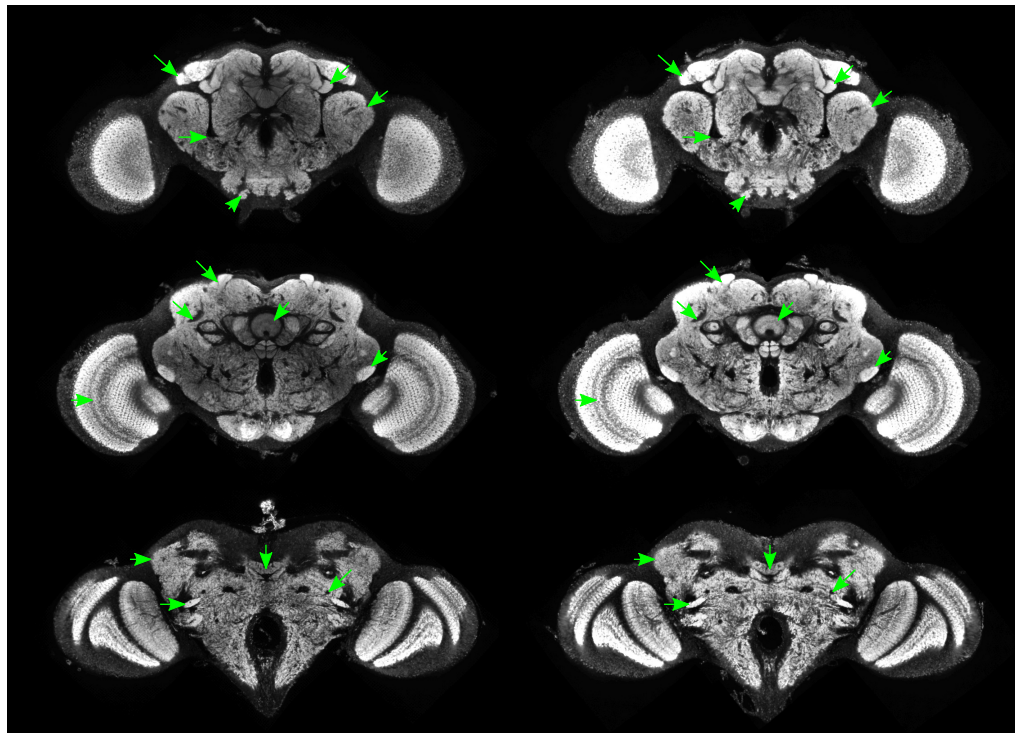

Fig S4. JRC2018 cmtkA



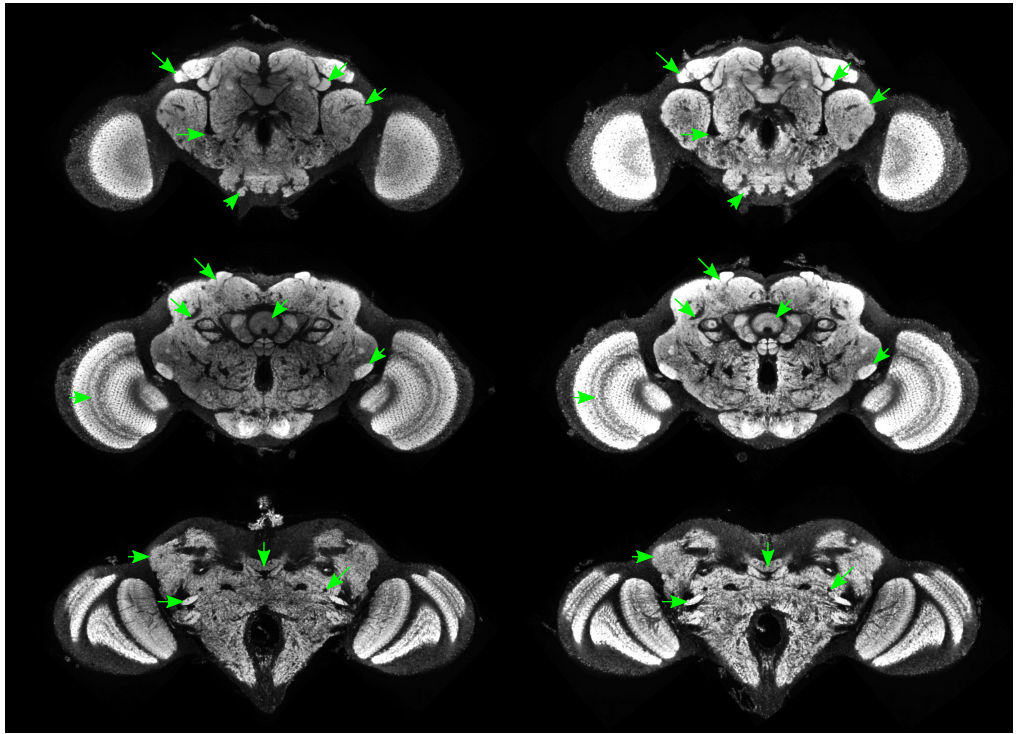

Fig S5. JRC2018 cmtkB

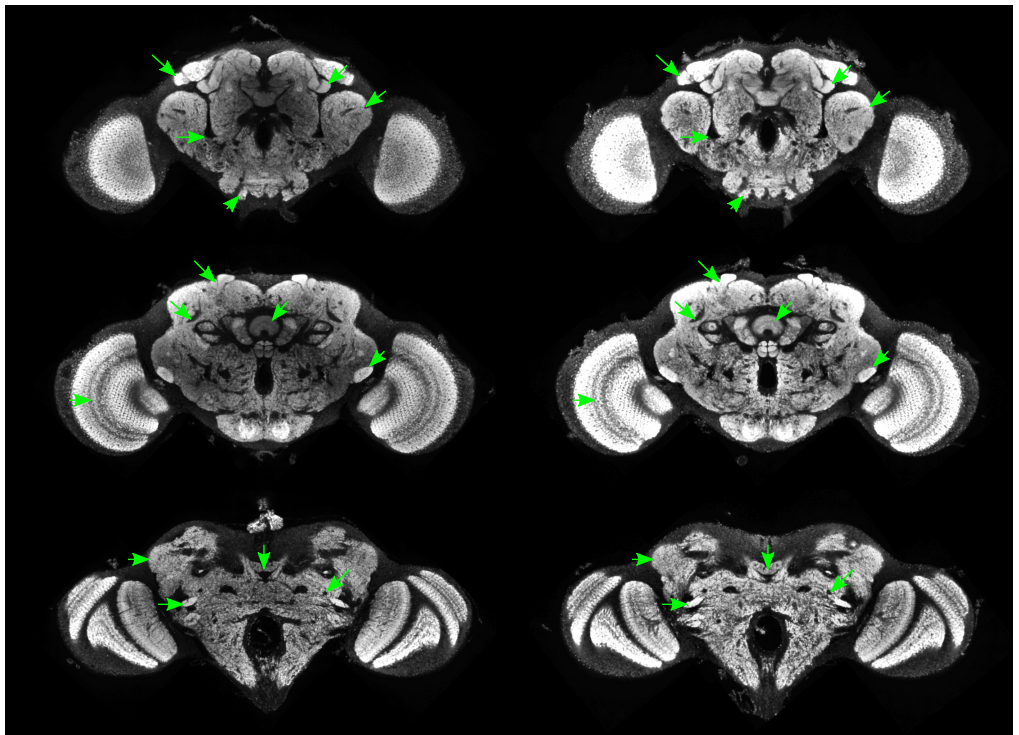

Fig S6. JRC2018 cmtkC

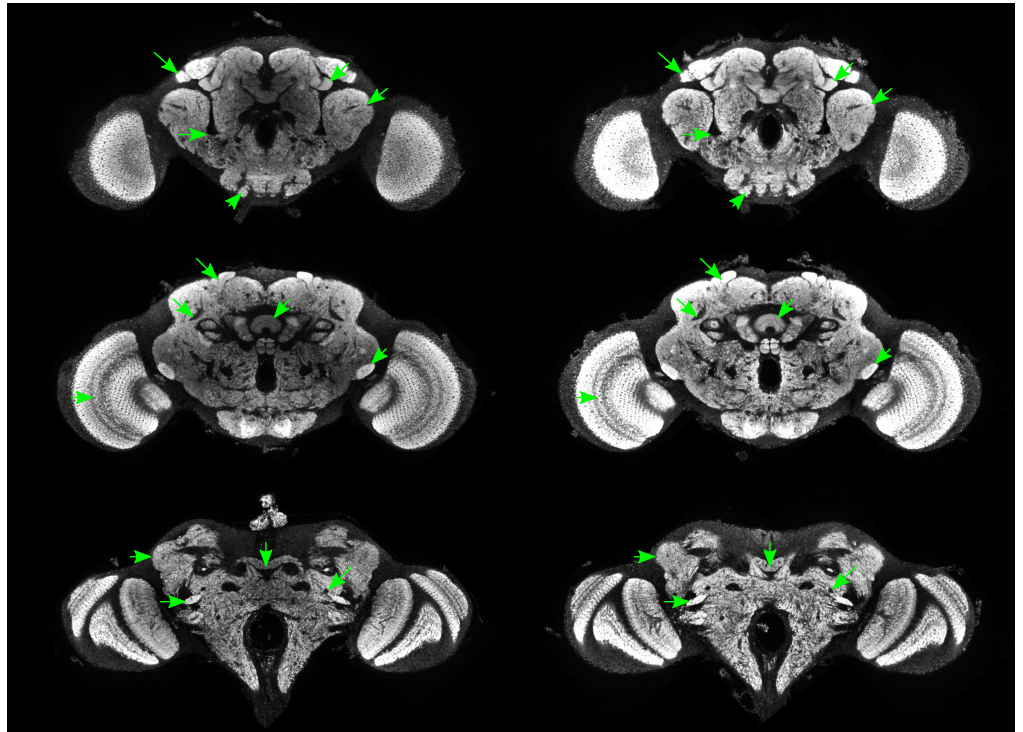

Fig S7. JRC2018 elastixA

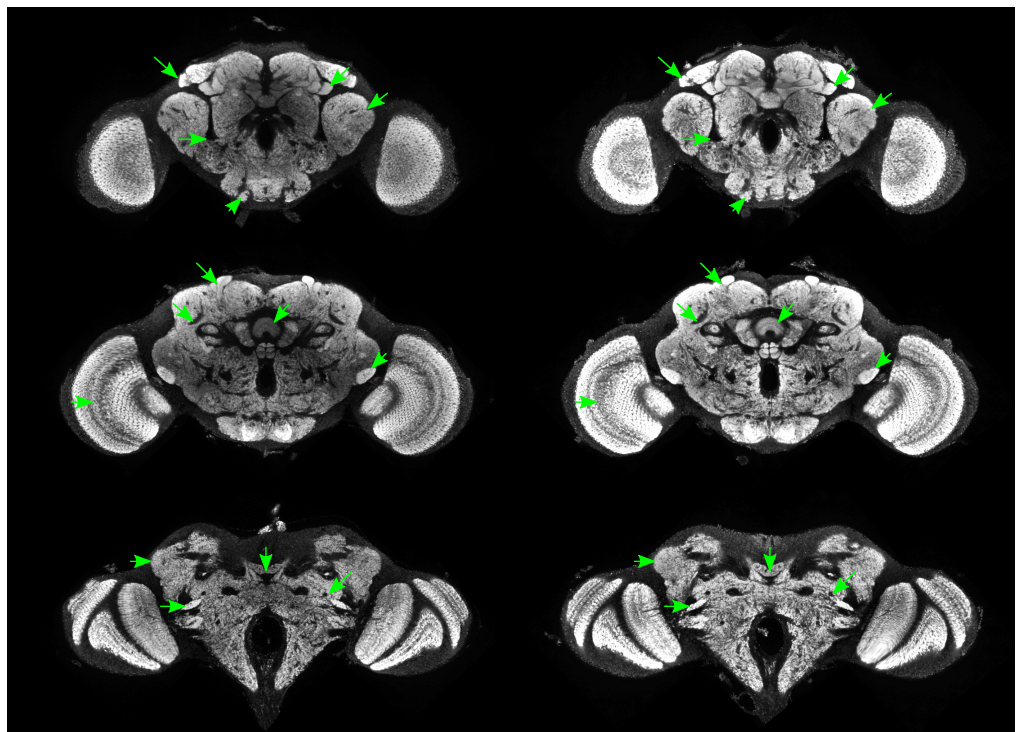

Fig S8. JRC2018 elastixB

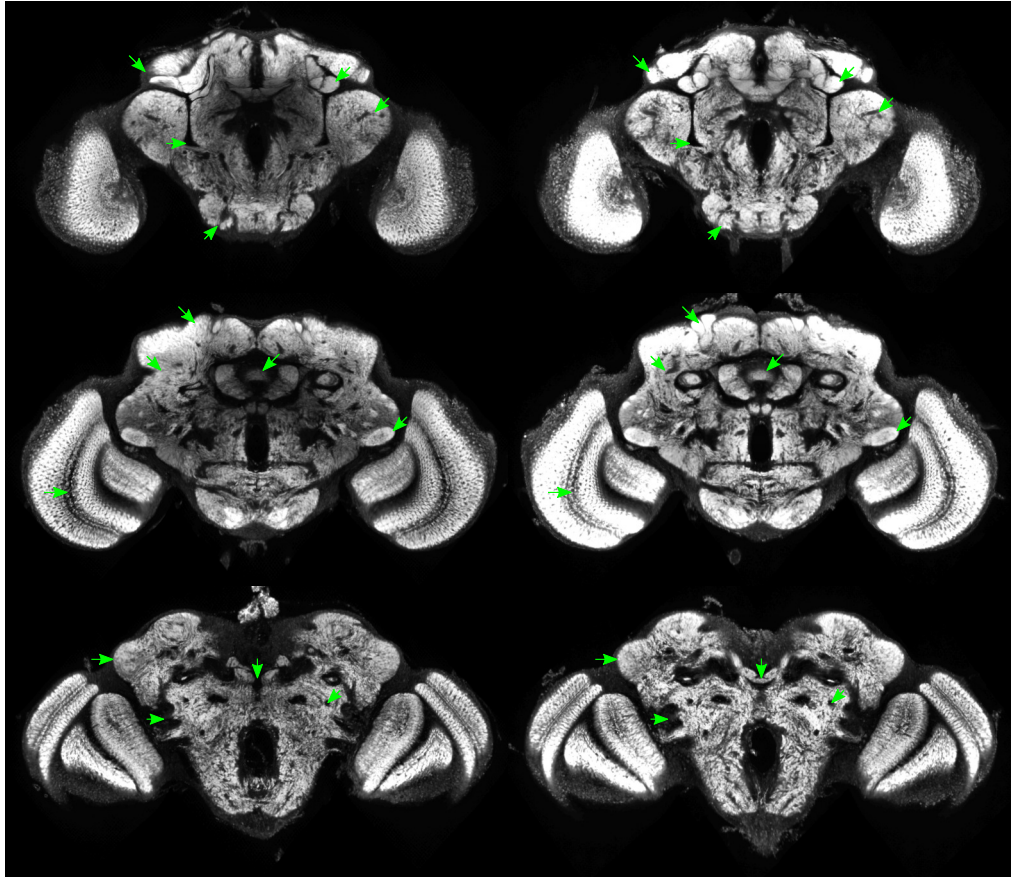

Fig S9. FCWB antsa

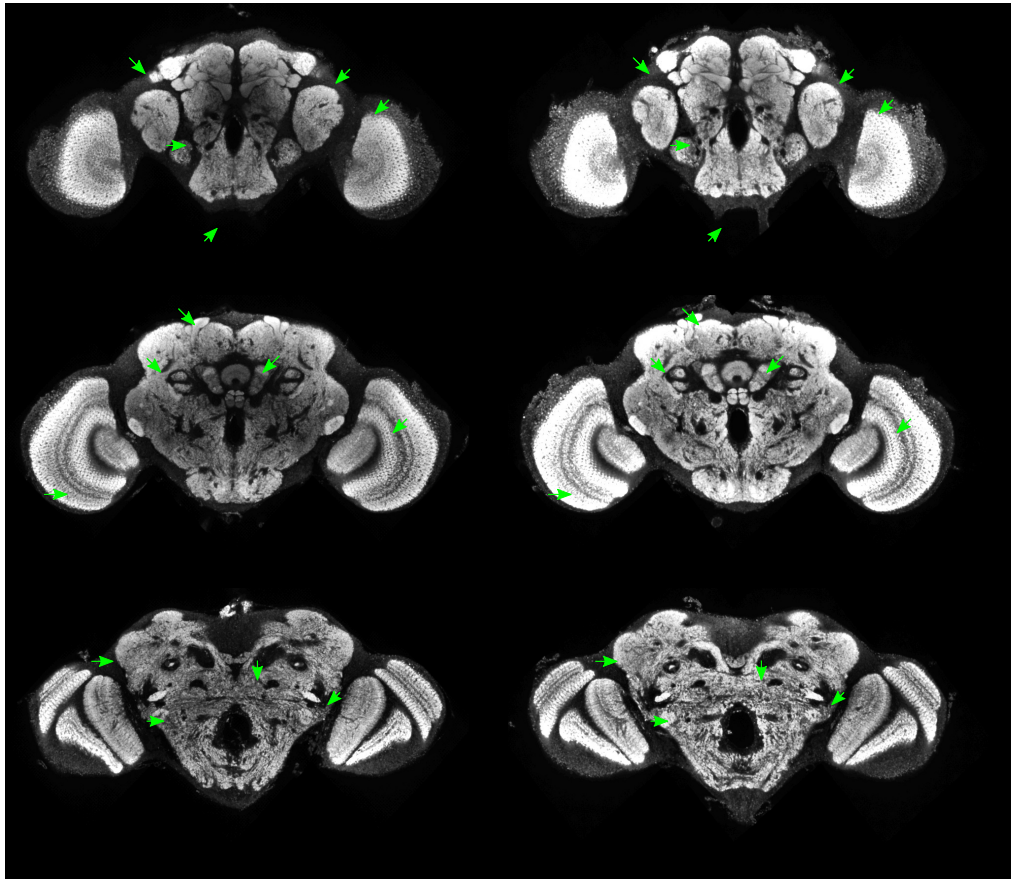

Fig S10. FCWB antsB

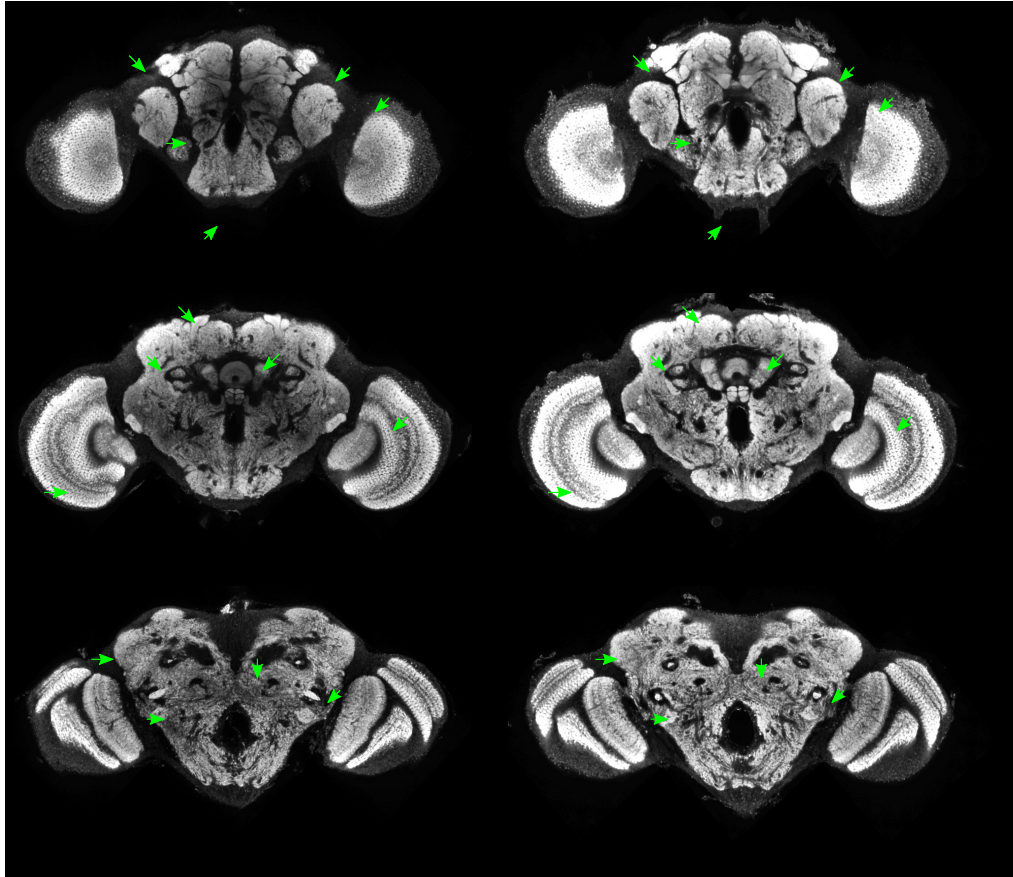

Fig S11. FCWB antsC

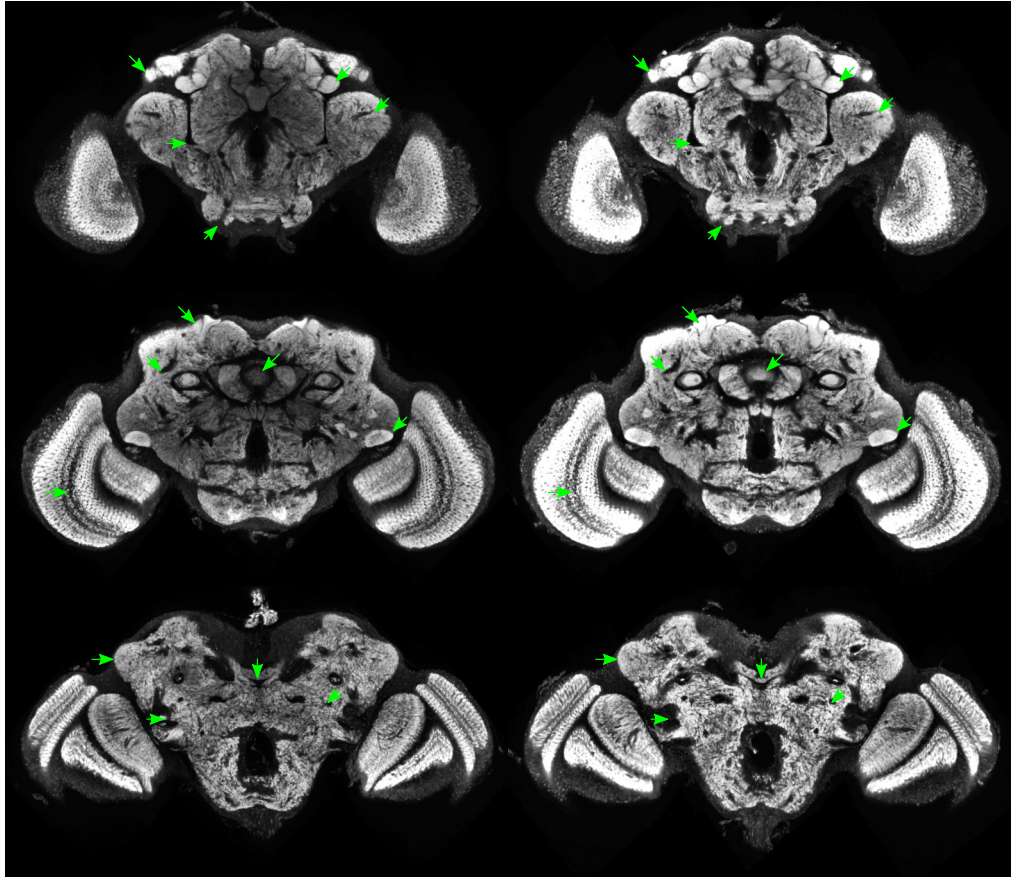

Fig S12. FCWB cmtkA

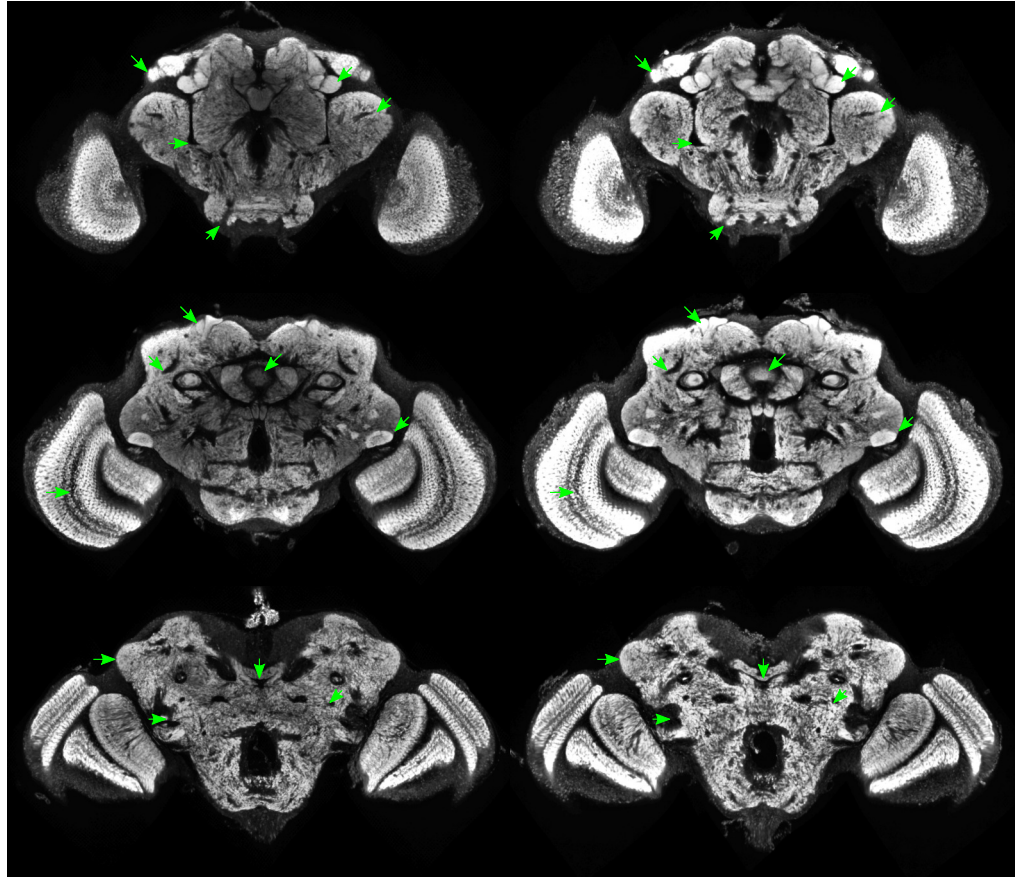

Fig S13. FCWB cmtkB

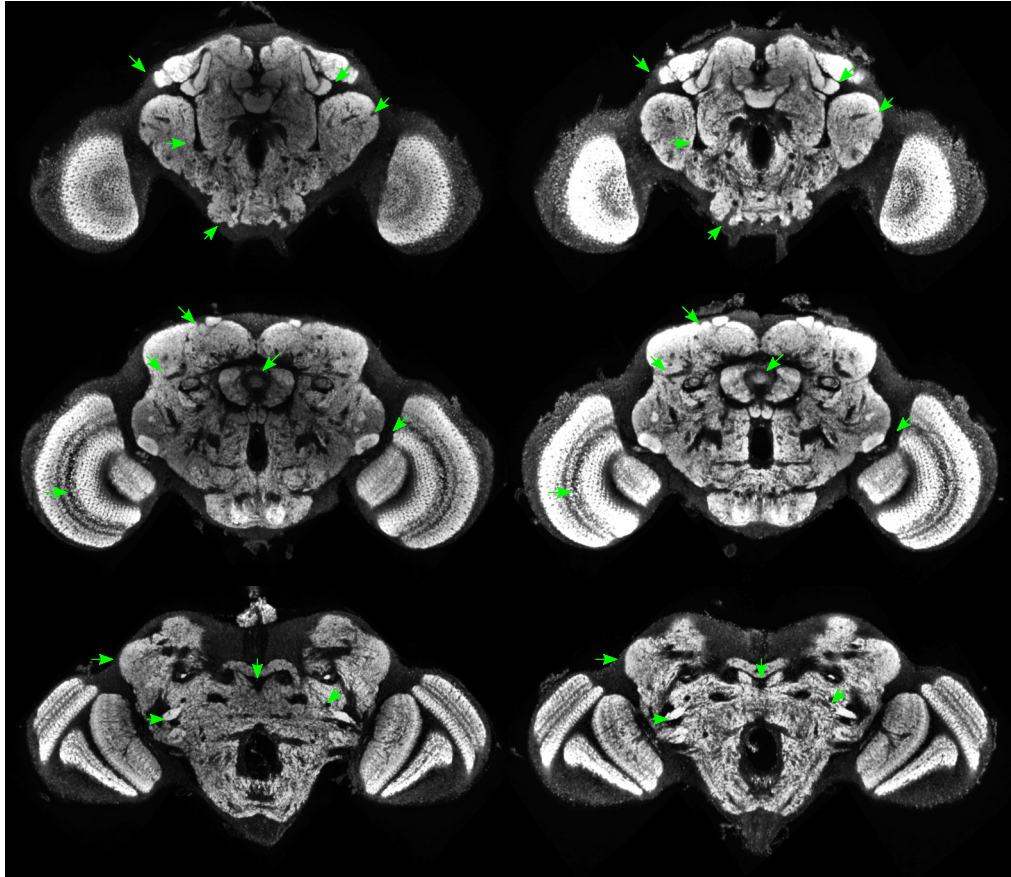

Fig S14. FCWB cmtkC



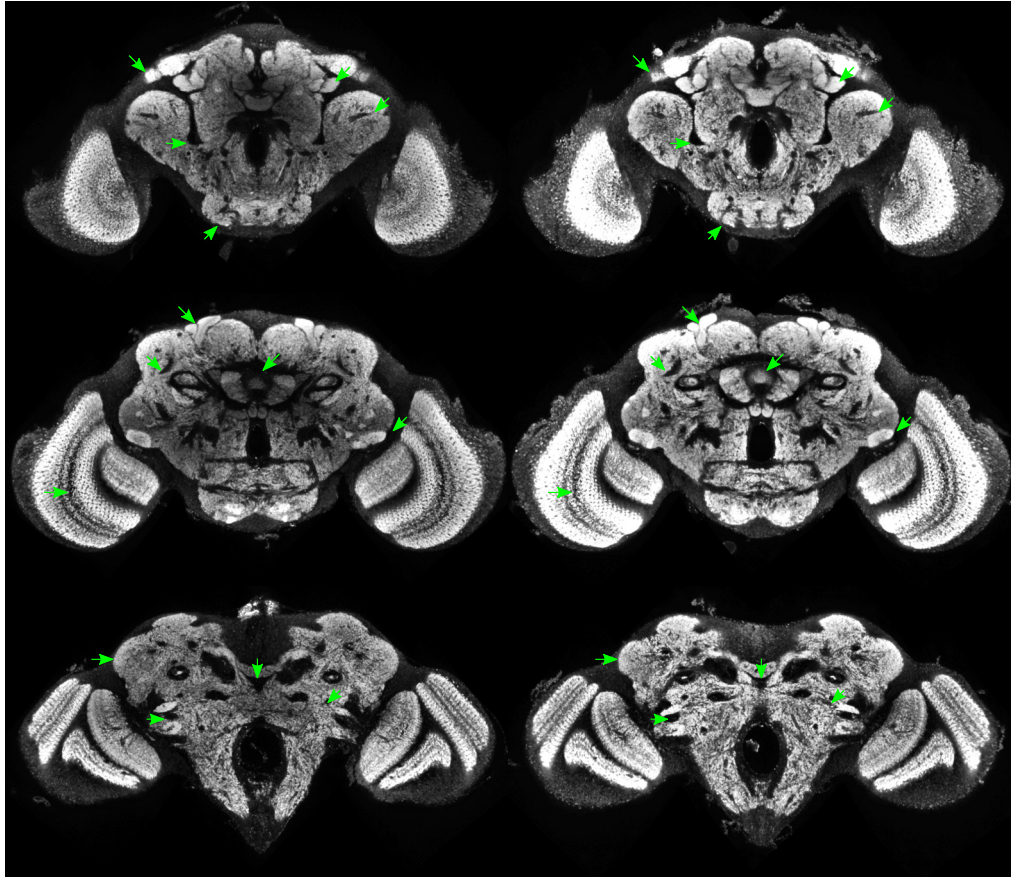

Fig S15. FCWB elastixA

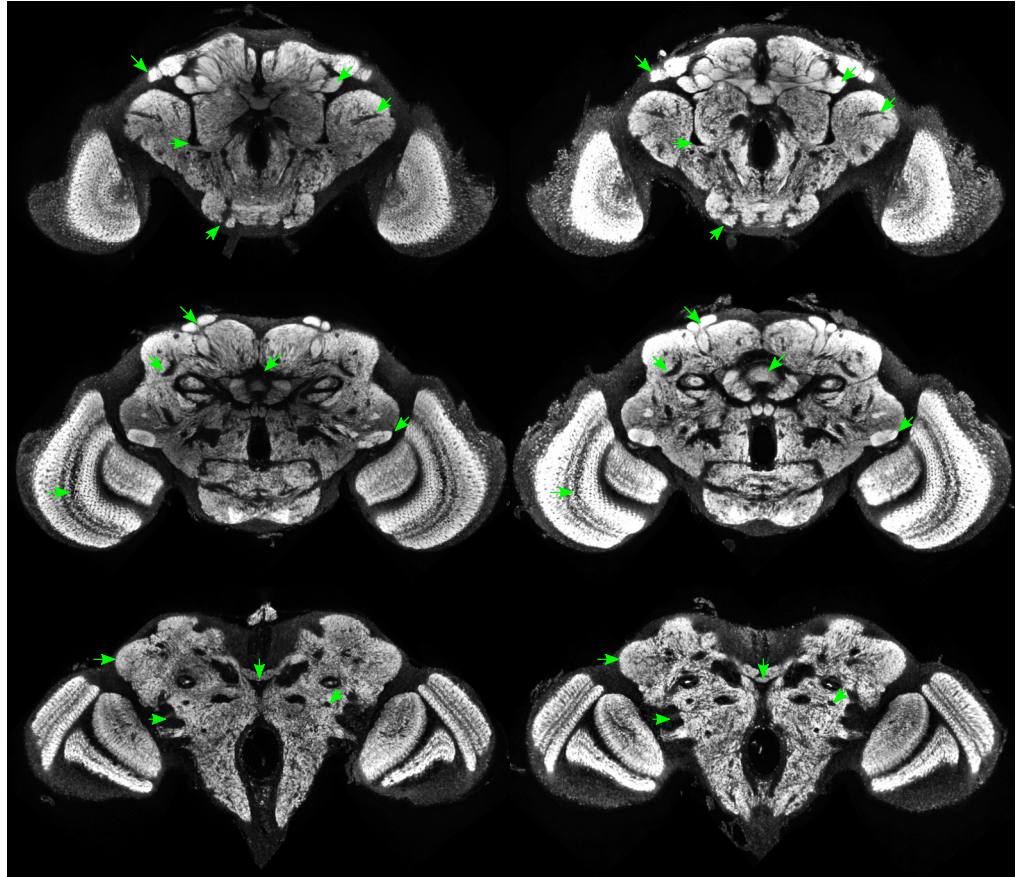

Fig S16. FCWB elastixB

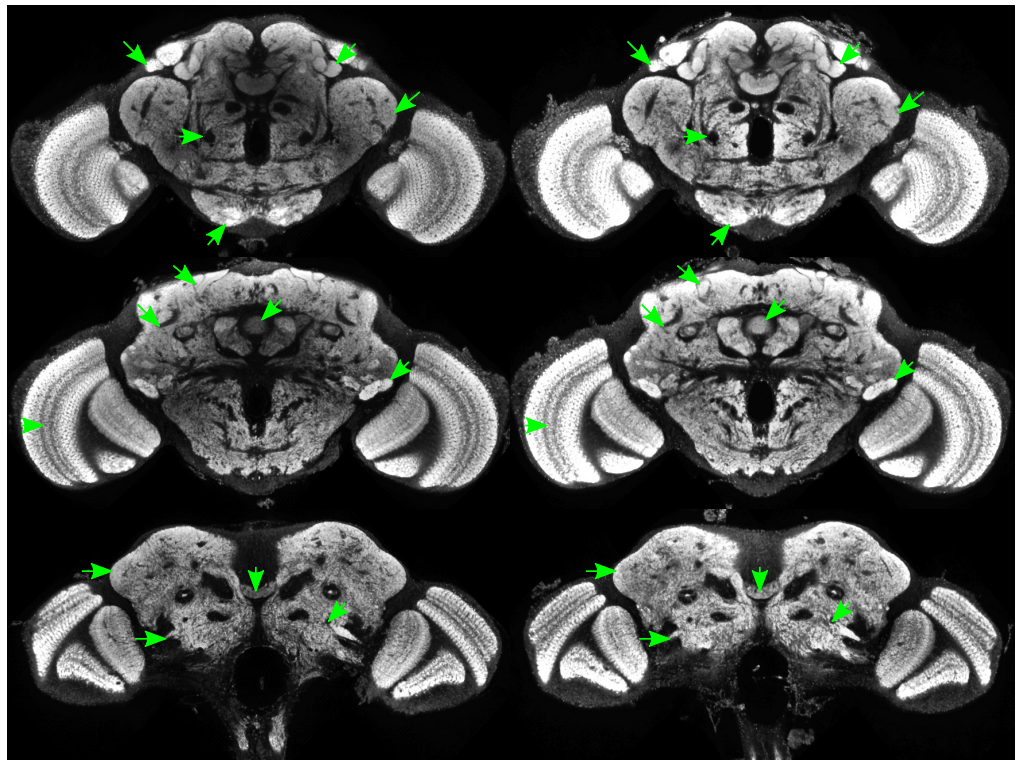

Fig S17. JFRC2013 antsA

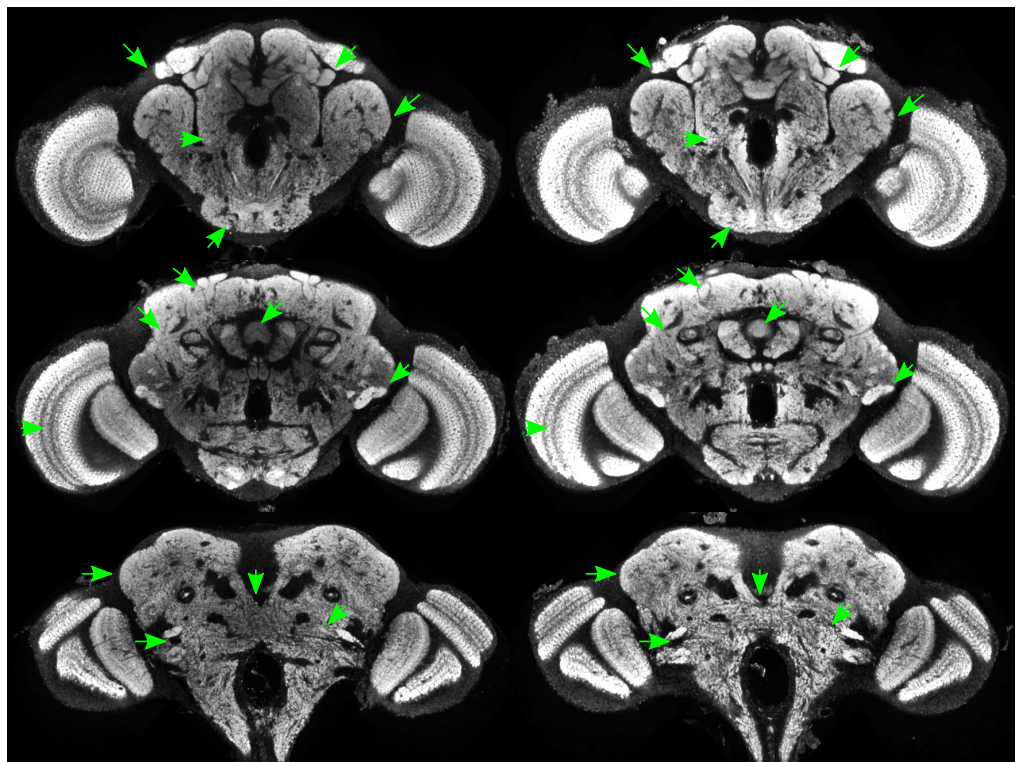

Fig S18. JFRC2013 antsB

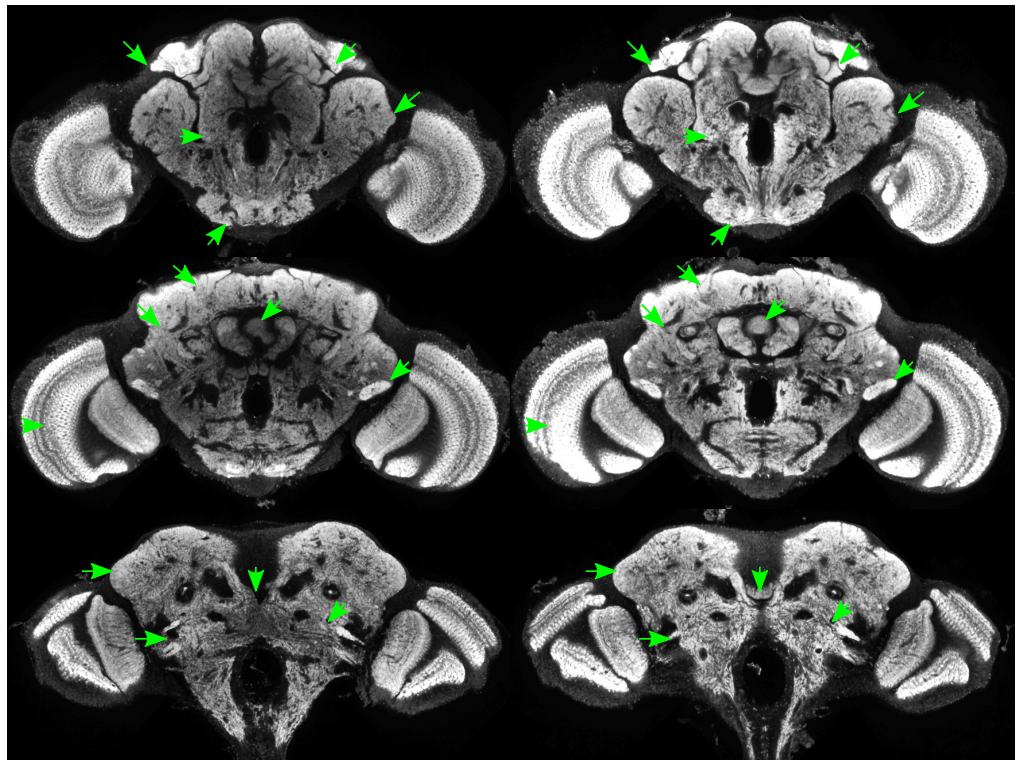

Fig S19. JFRC2013 antsC

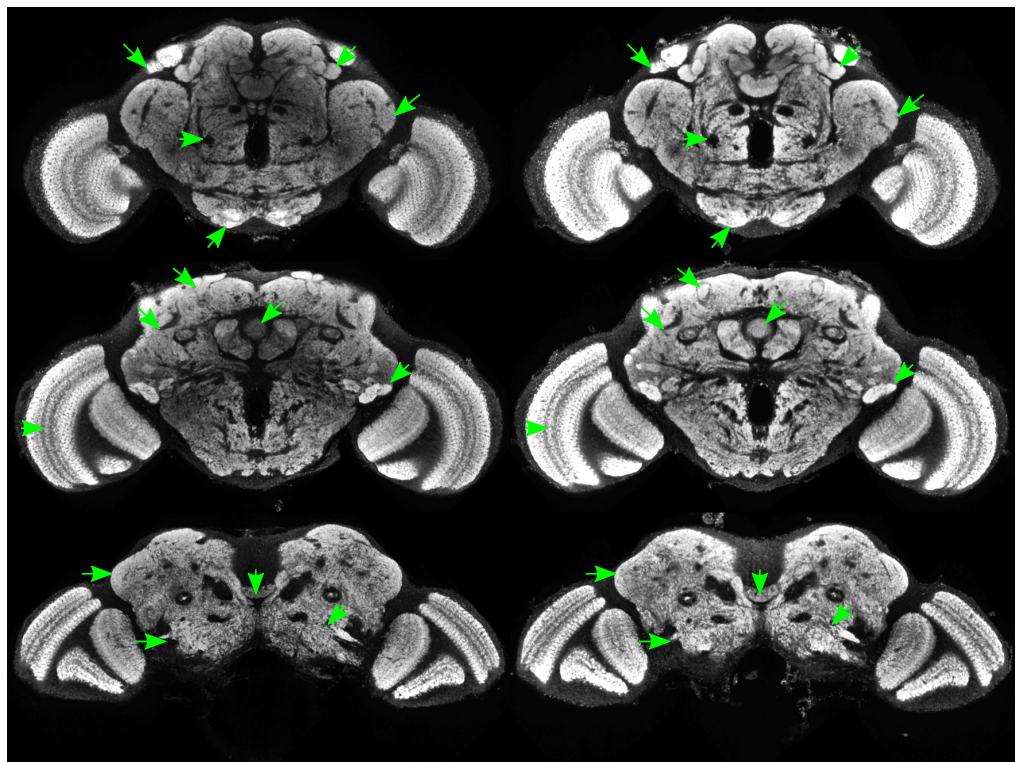

Fig S20. JFRC2013 cmtkA

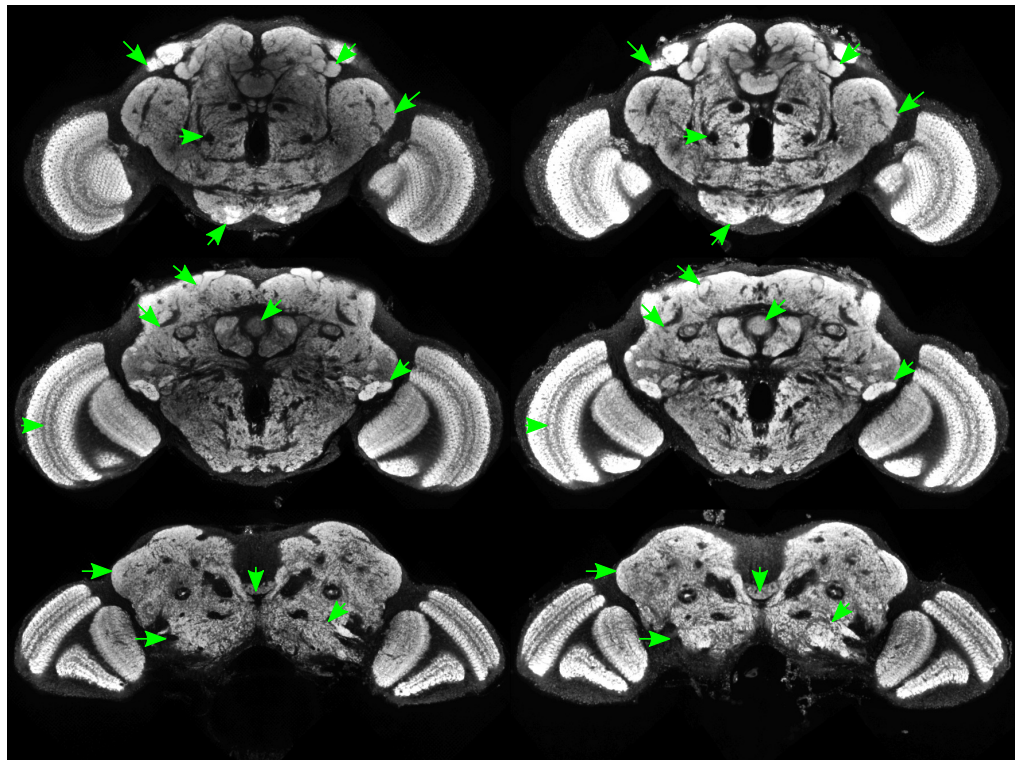

Fig S21. JFRC2013 cmtkB

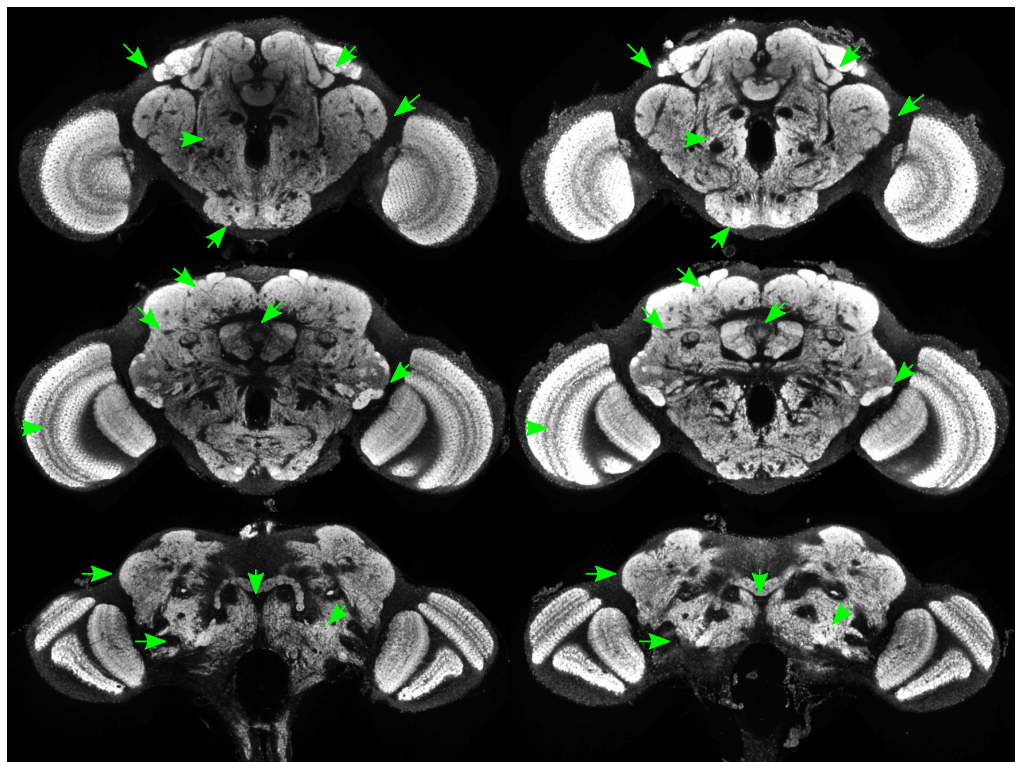

Fig S22. JFRC2013 cmtkC

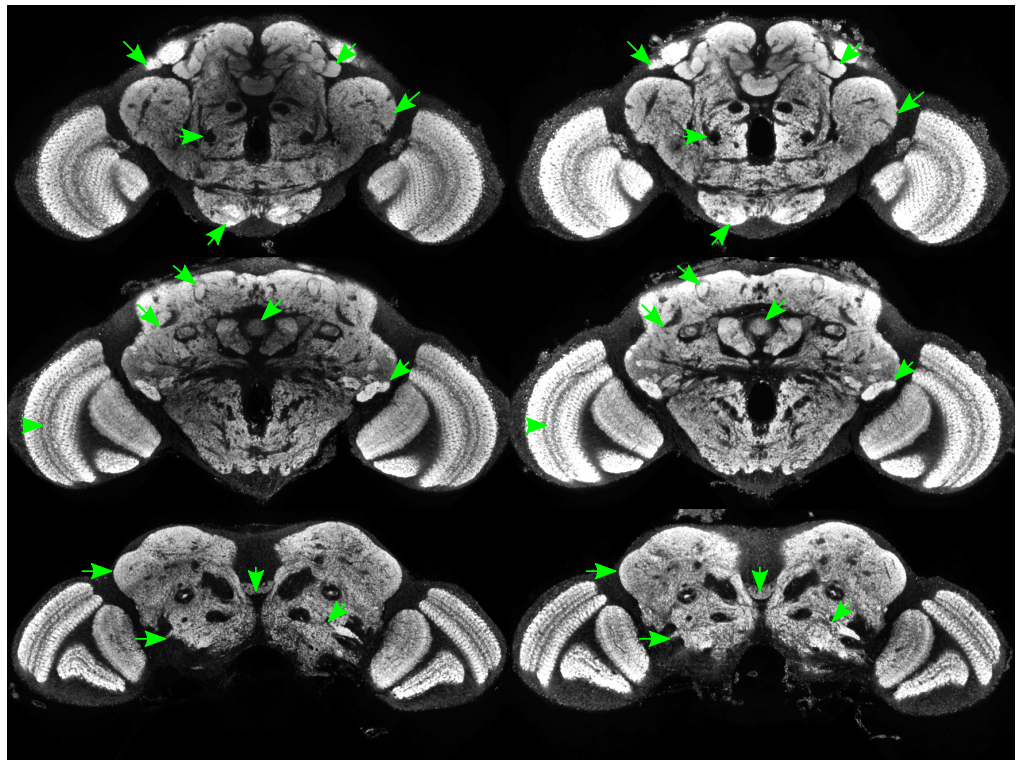

Fig S23. JFRC2013 elastixA

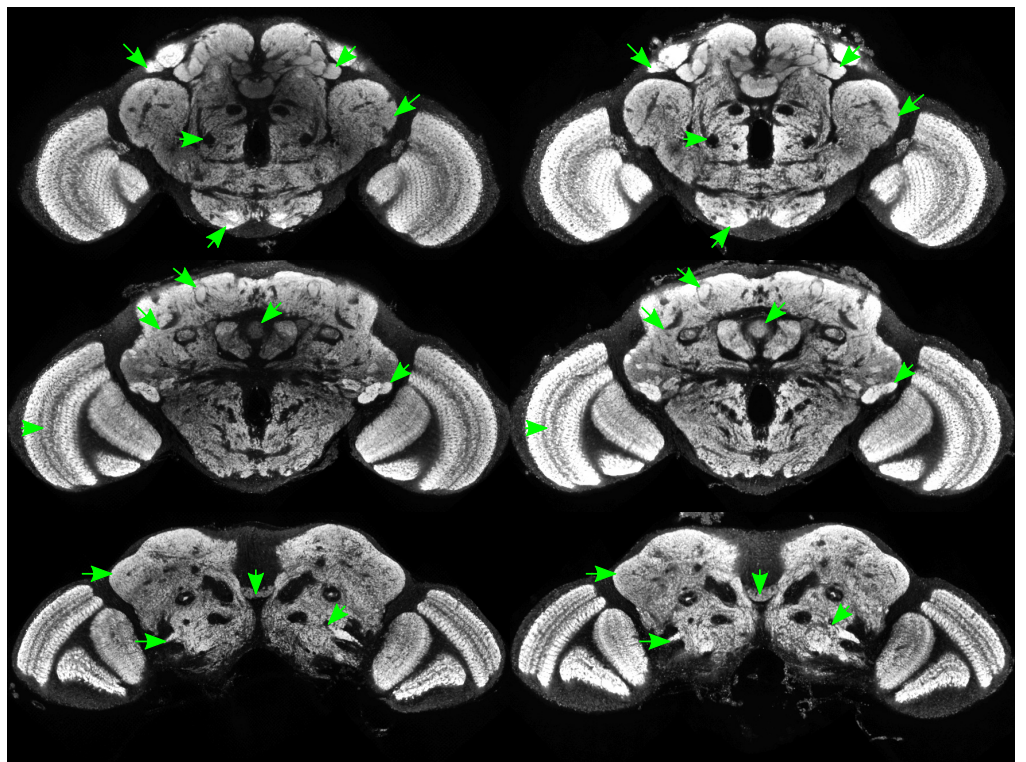

Fig S24. JFRC2013 elastixB

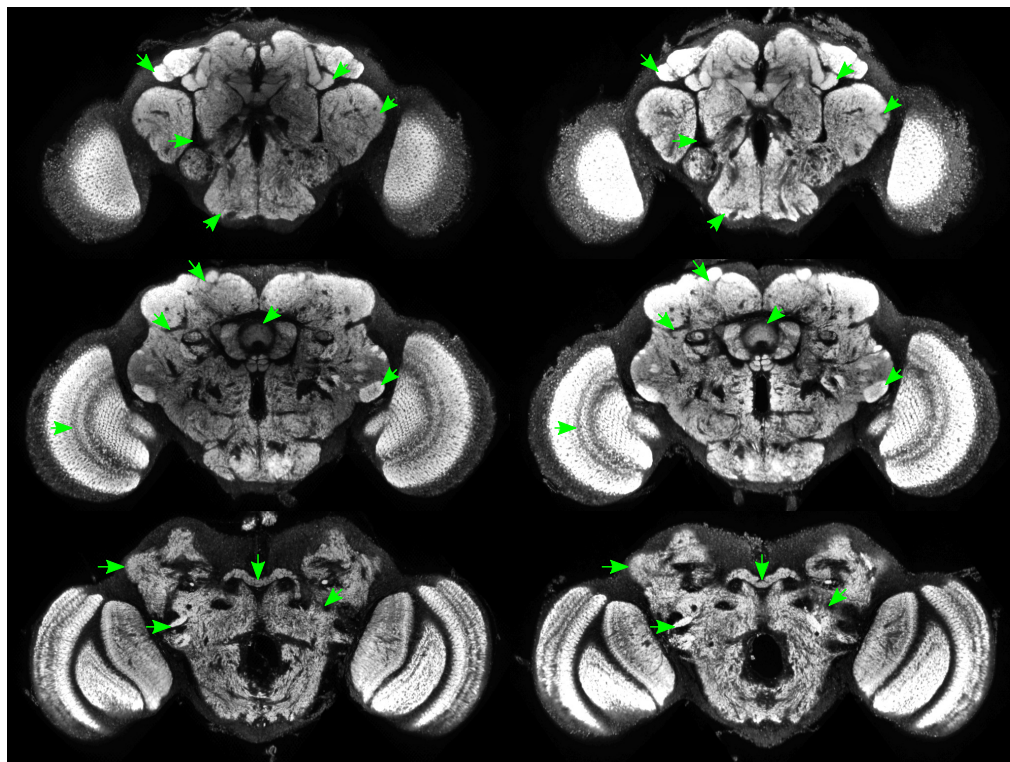

Fig S25. JFRC2010 antsA

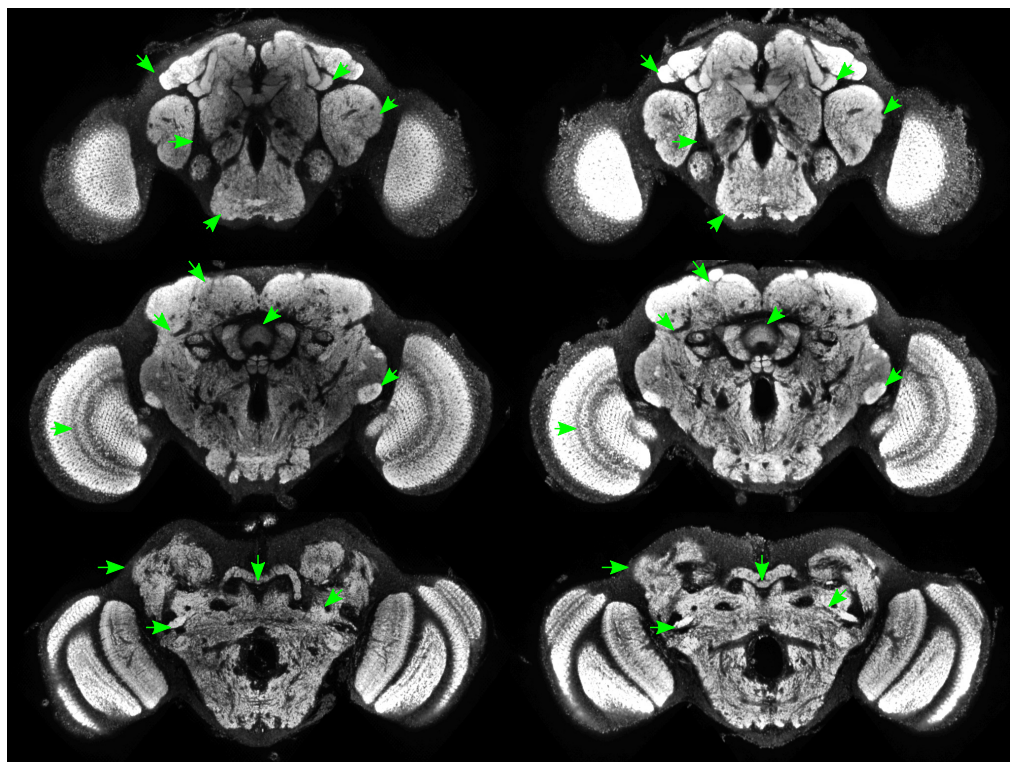

Fig S26. JFRC2010 antsB

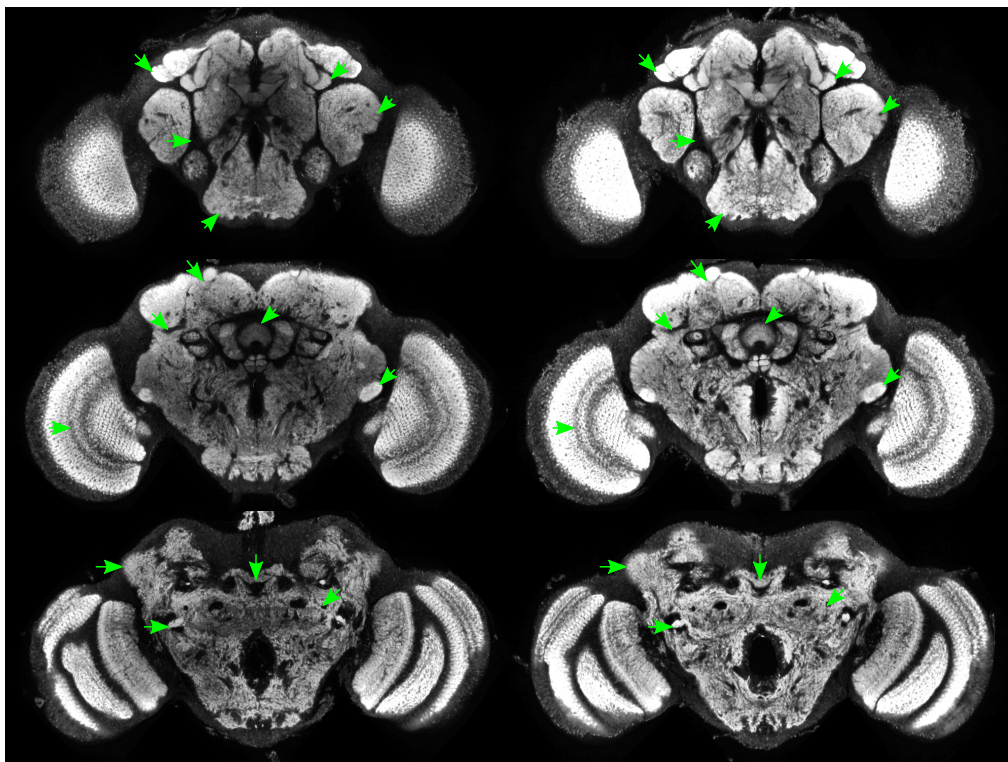

Fig S27. JFRC2010 antsC

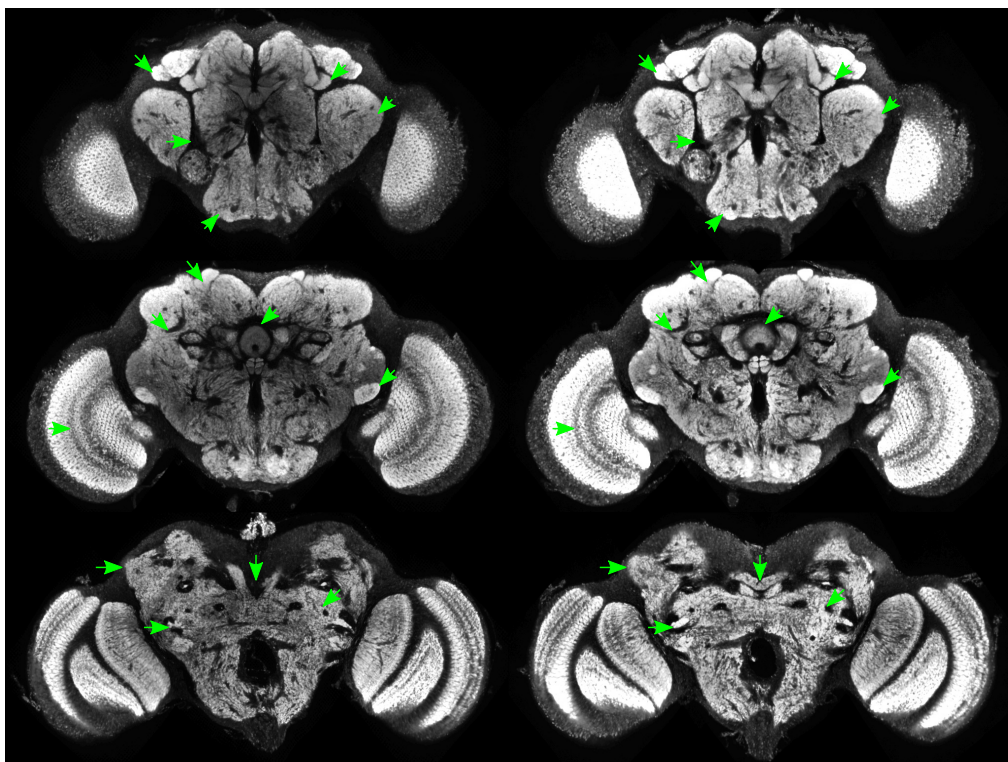

Fig S28. JFRC2010 cmtkA



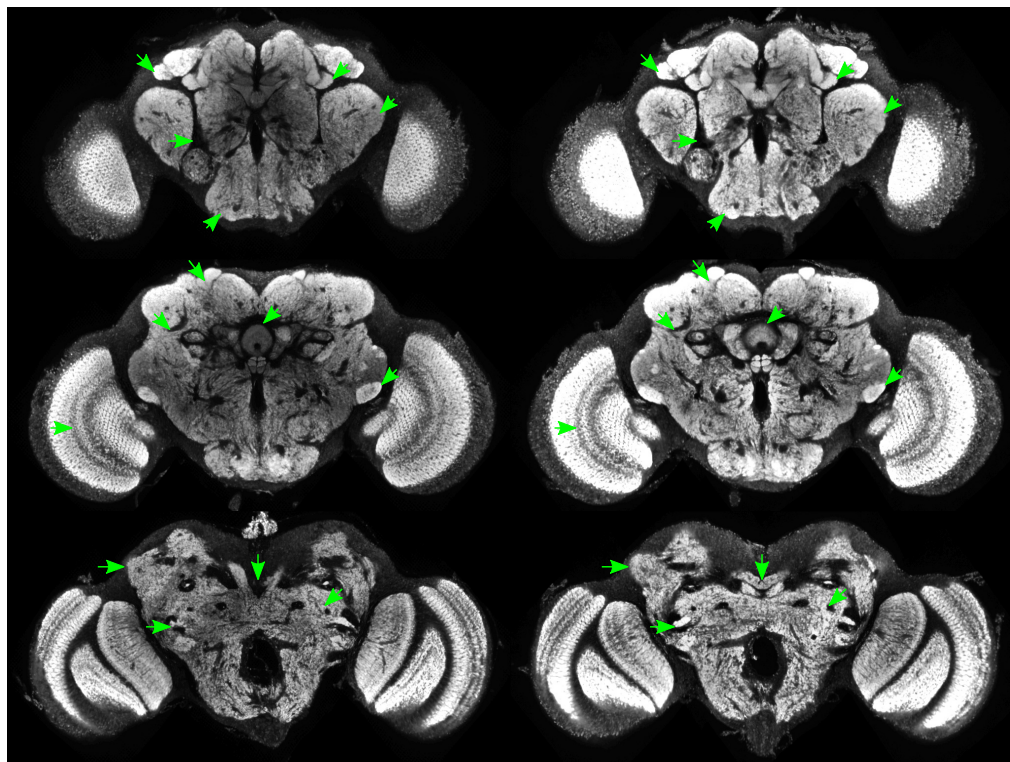

Fig S29. JFRC2010 cmtkB

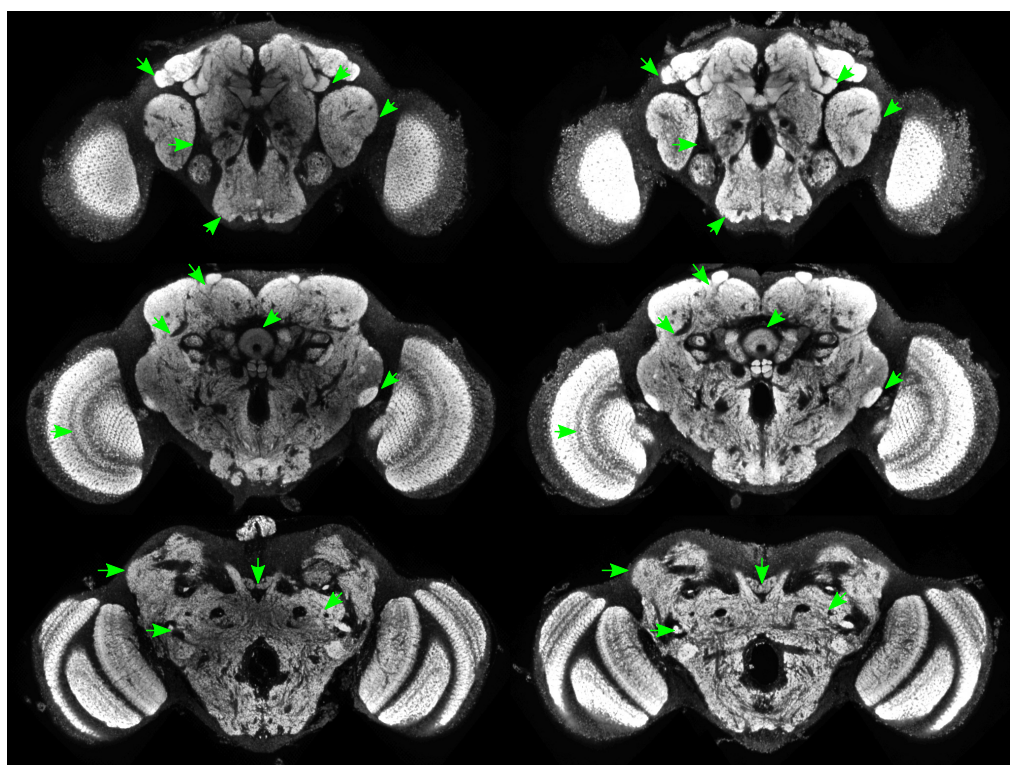

Fig S30. JFRC2010 cmtkC

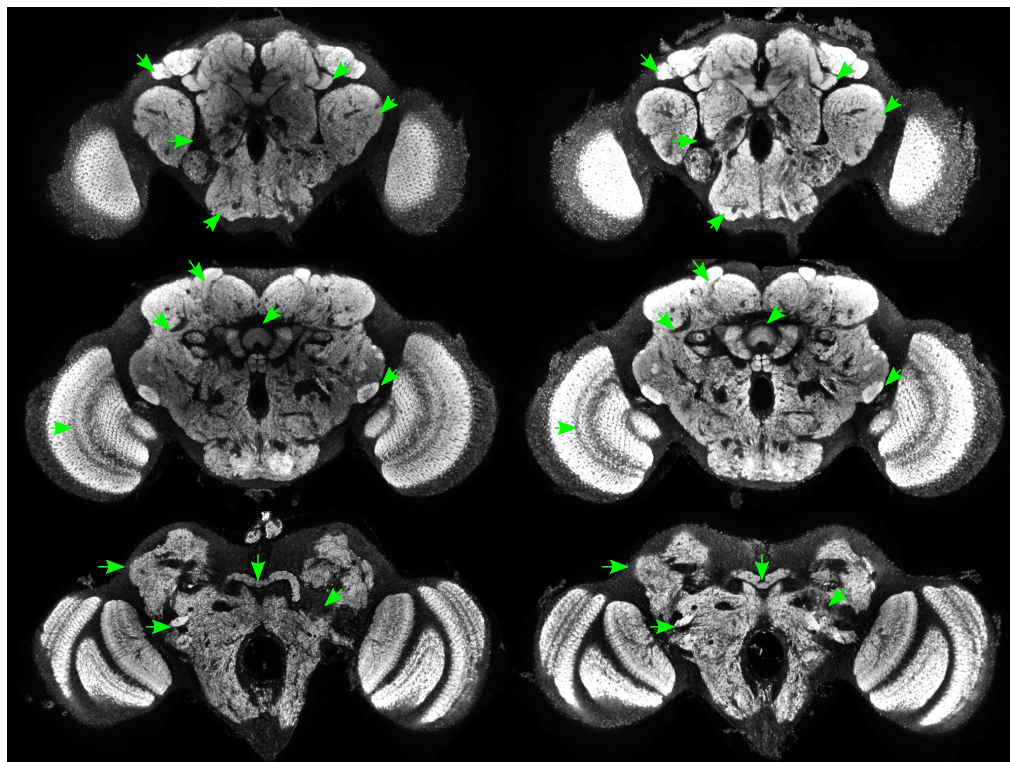

Fig S31. JFRC2010 elastixA

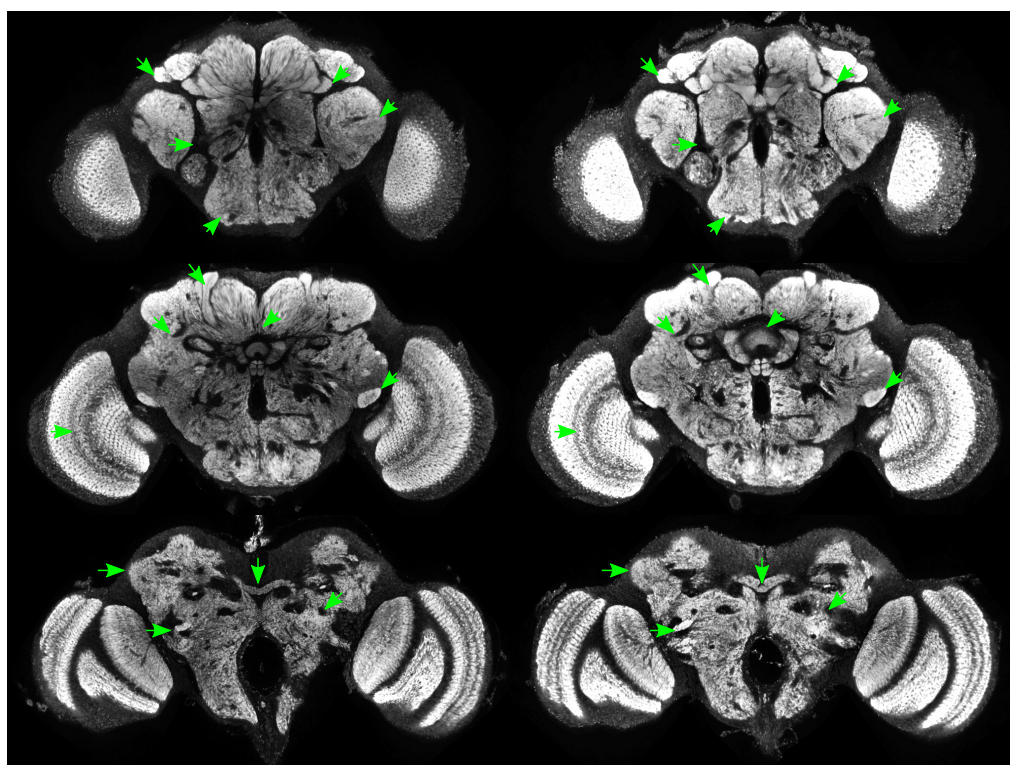

Fig S32. JFRC2010 elastixB

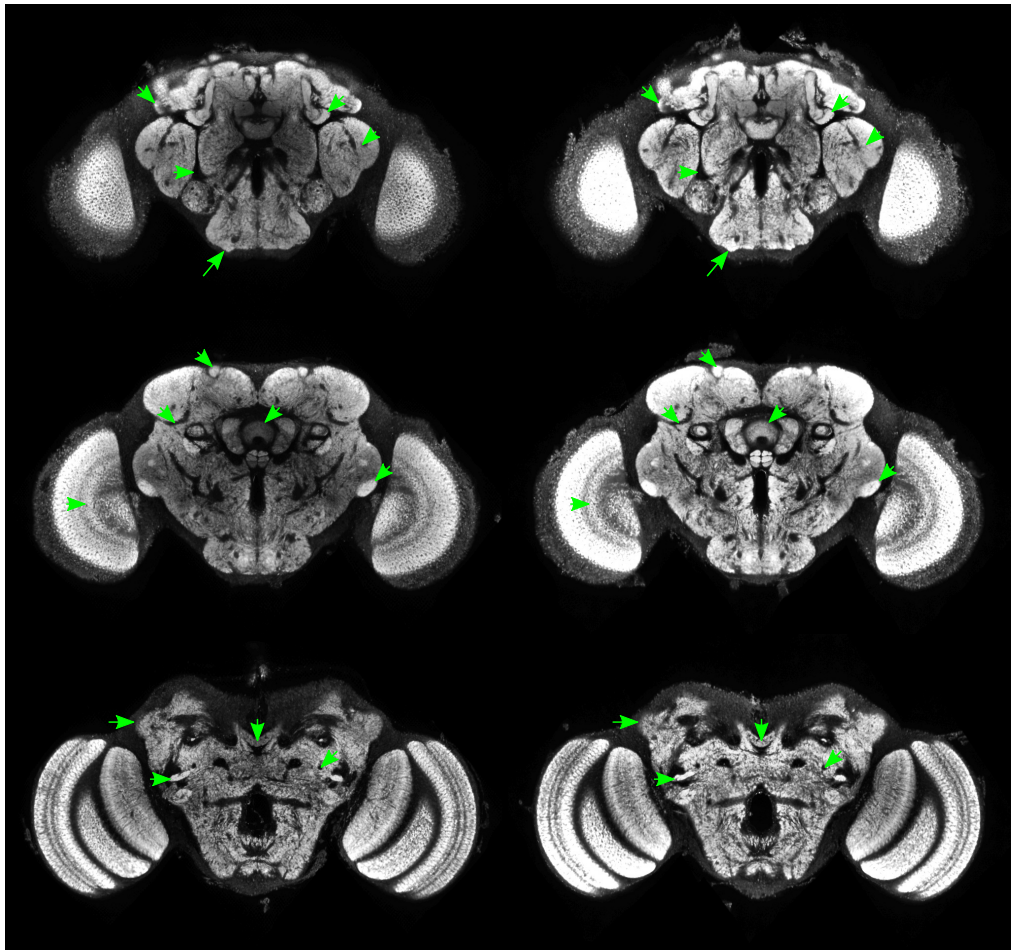

Fig S33. Tefor antsA

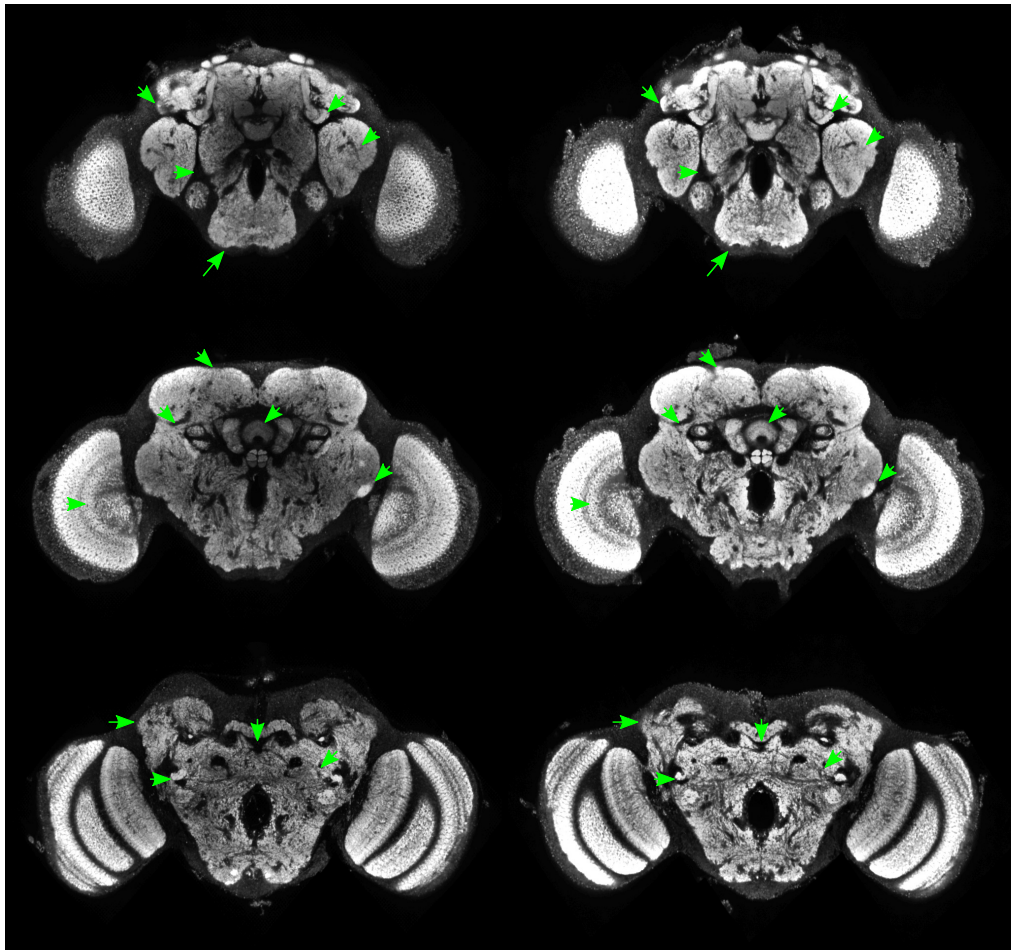

Fig S34. Tefor antsB

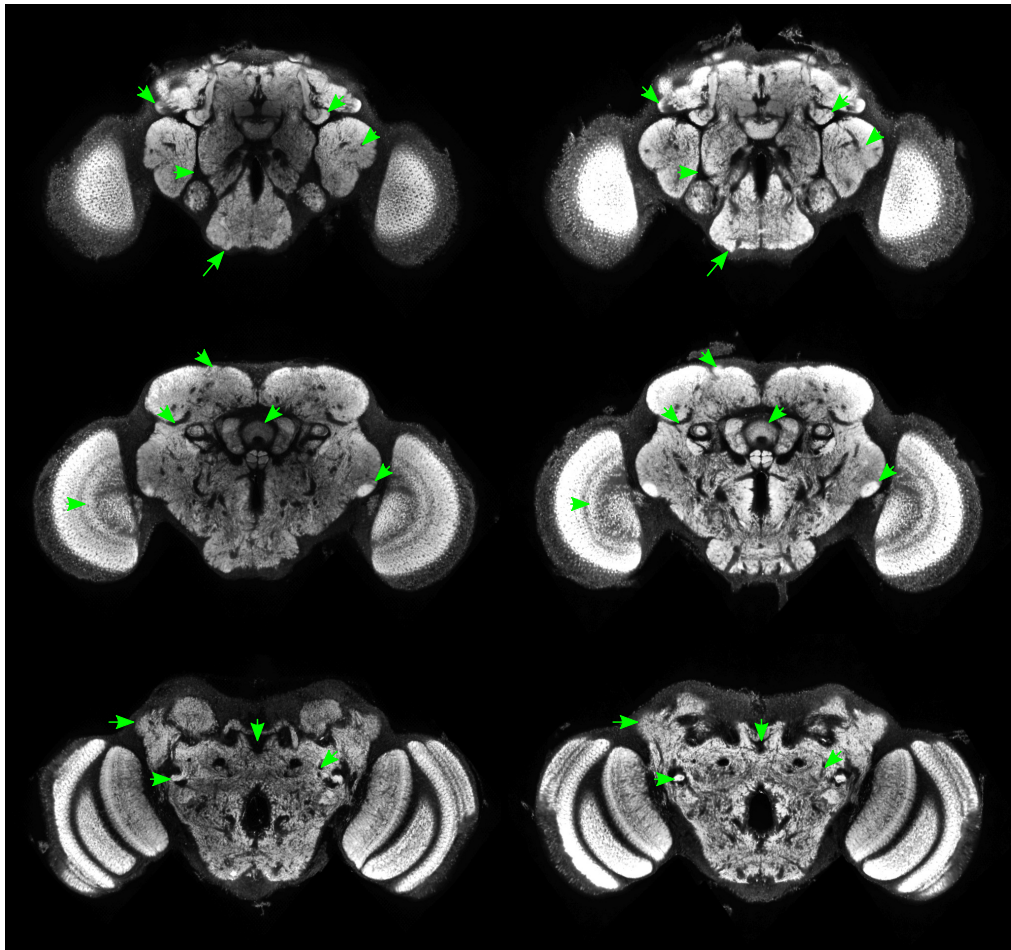

Fig S35. Tefor antsC

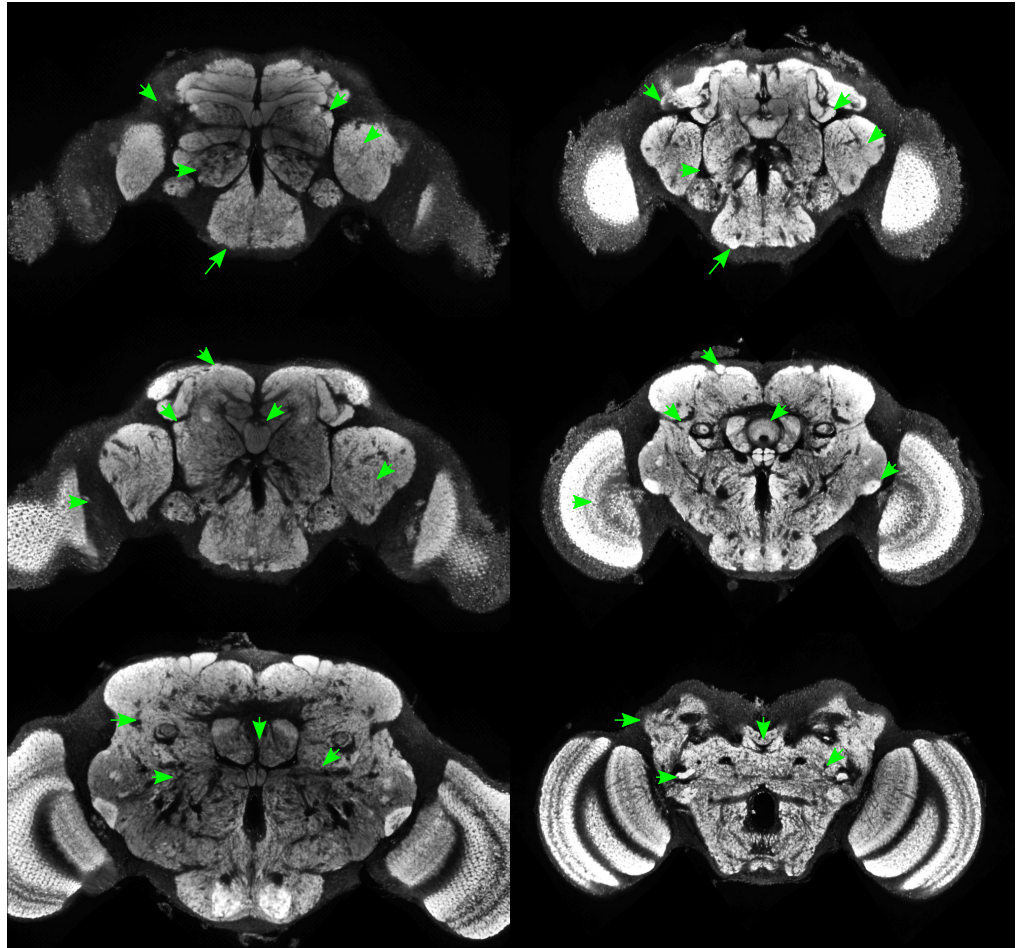

Fig S36. Tefor cmtkA

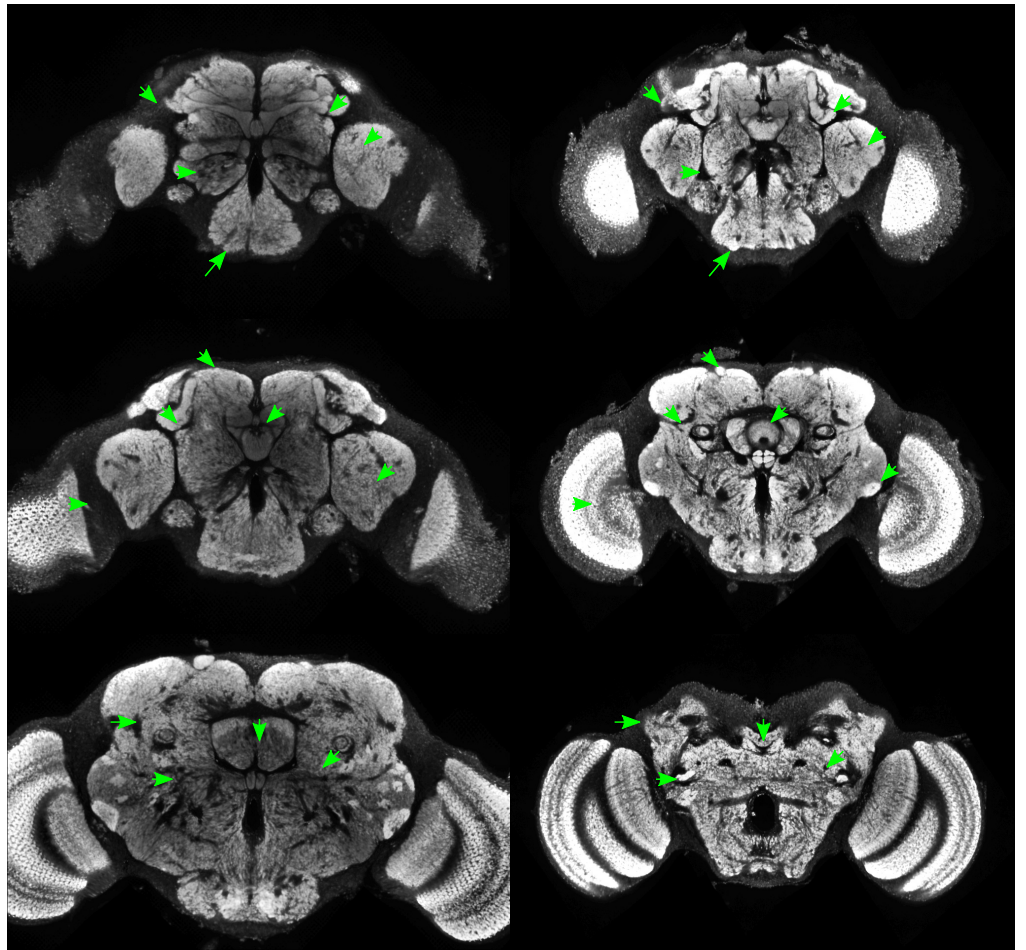

Fig S37. Tefor cmtkB

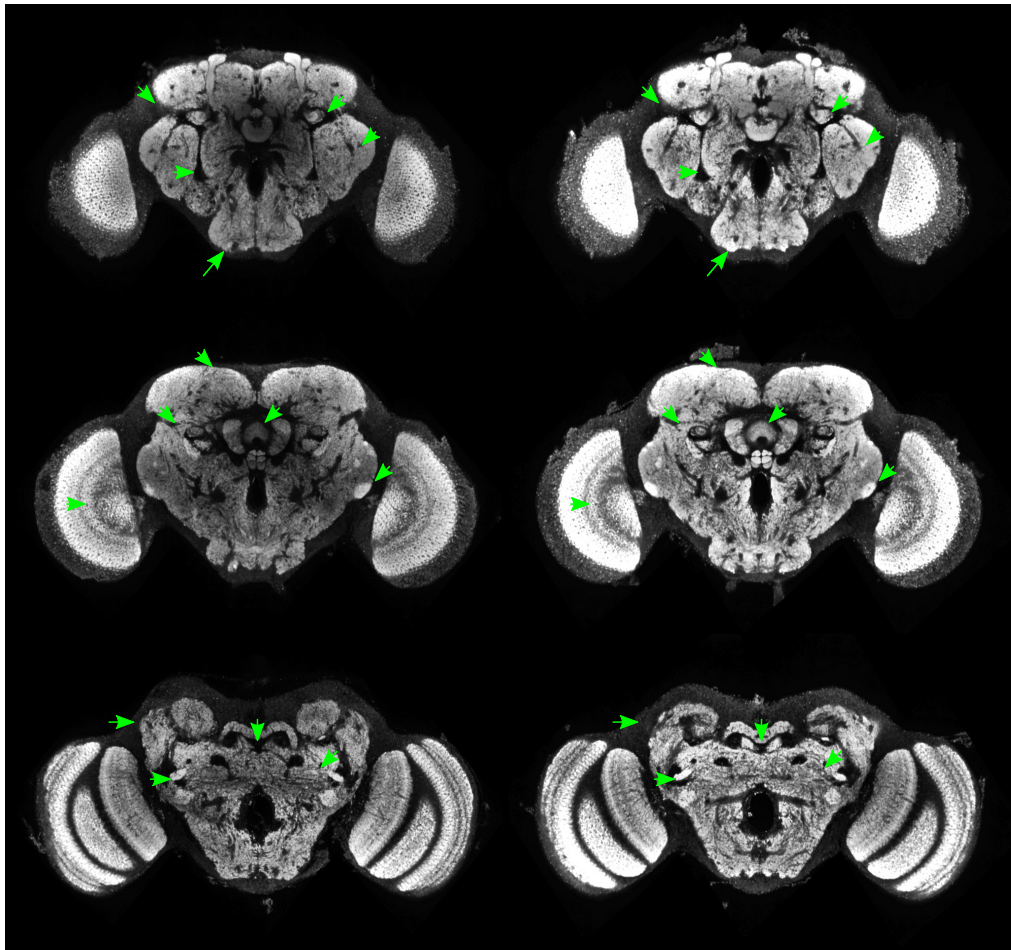

Fig S38. Tefor cmtkC



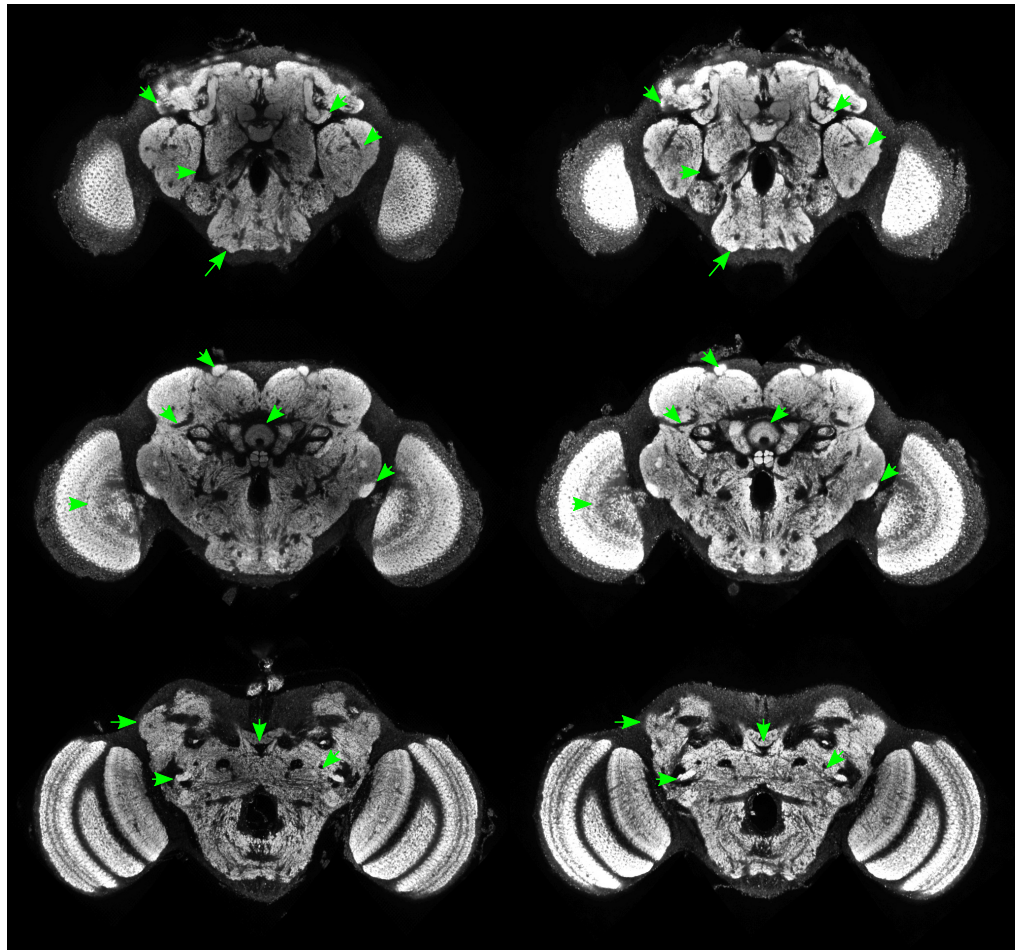

Fig S39. Tefor elastixA

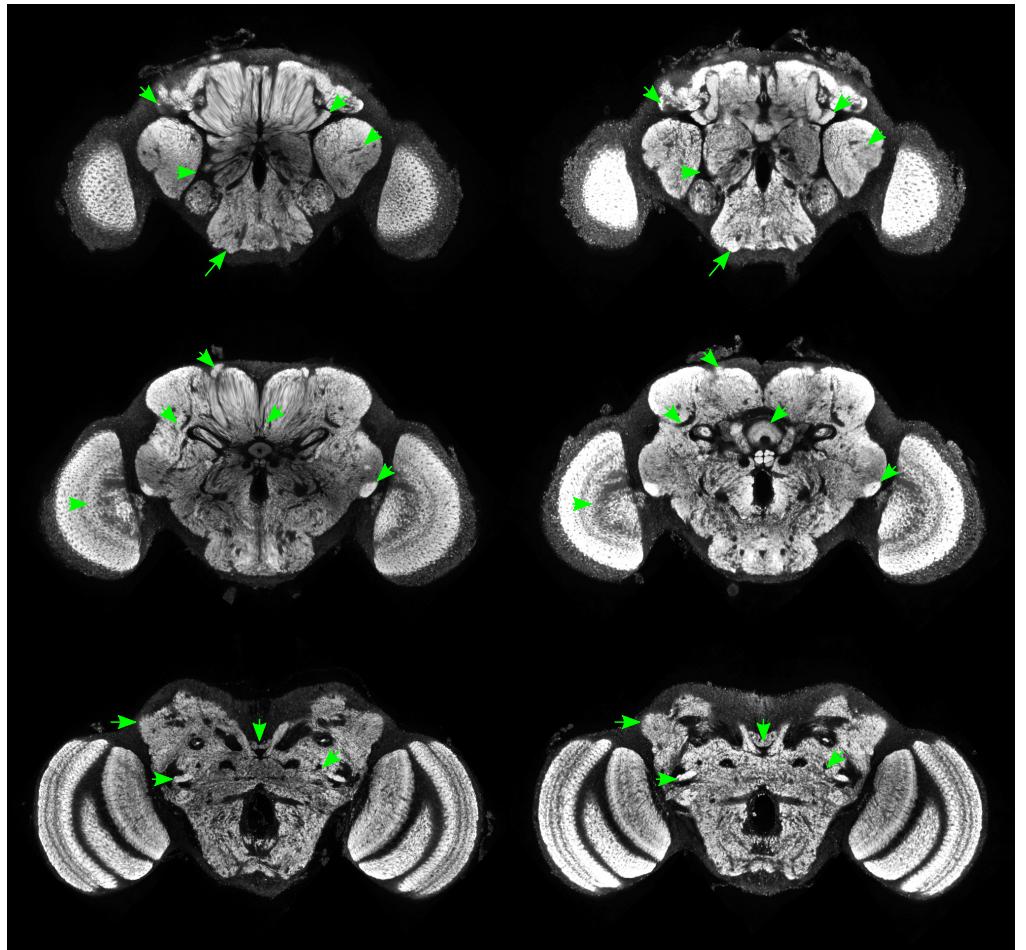

Fig S40. Tefor elastixB
