# Supplementary material for: An unbiased template of the Drosophila brain and ventral nerve cord
Source: PubMed Central journal article supplement (PMC7774840; doi:10.1371/journal.pone.0236495), 2020-12-31

FAFB  
ssTEM

(a)

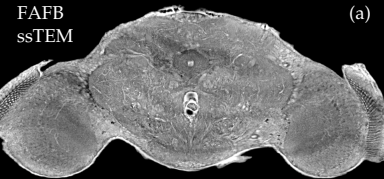

FAFB  
synapses

(b)

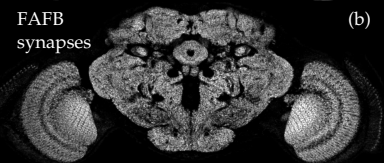

JRC 2018  
atlas

(c)

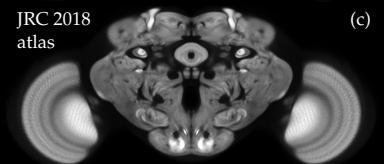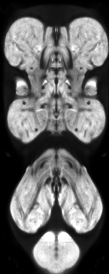

100  $\mu$ m

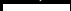

Supplement: pone.0236495.s003.pdf [file pone.0236495.s003.pdf]
